# Supplementary material for: Monocyte-derived APCs are central to the response of PD1 checkpoint blockade and provide a therapeutic target for combination therapy
Source: J Immunother Cancer. 2020 Jul 19;8(2):e000588. doi: 10.1136/jitc-2020-000588 (PMC7371367; doi:10.1136/jitc-2020-000588)
Supplement: Supplementary data [file jitc-2020-000588supp001.xlsx]

## Sheet: Myeloid
Target	Clone	Fluochrome		Company
MHCI	AF6-88.5.5.3	V450		Thermo Fisher
CD86	GL-1	BV510		Biolegend
Ly6C	HK1.4	BV605		Biolegend
CD11c	N418	BV650		Biolegend
NK1.1	PK136	BV711		Biolegend
CD45	30-F11	BV785		Biolegend
CD11b	M1/70	AF488		Thermo Fisher
CD155	TX56	PerCP-Cy5.5		Biolegend
Galectin 9	108A2	PE		Biolegend
PDL1	10F.9G2	PE-Dazzle594		Biolegend
BTLA	REA224	PE-Cy7		Miltenyi
ILT3	H1.1	AF647		Biolegend
MHCII	M5	AF700		Biolegend
FixViaDye		eFluor780		Thermo Fisher
XCR1	ZET	BV421		Biolegend
B220	RA3-6B2	BV510		Biolegend
F4/80	BM8	PE		Thermo Fisher
GR1	RB6-8C5	PE-Cy5		Biolegend
CCR2	SA203G11	PE-Cy7		Biolegend
SIRPa	P84	APC		Biolegend
CD40	1C10	PE		Thermo Fisher
PDL1	10F.9G2	PE-Cy7		Biolegend
CD64	X53-5/7.1	APC		Biolegend
F4/80	BM8	BV510		biolegend
iNOS	CXNFT	PE-Efl610		Thermo Fisher

## Sheet: Lymphoid
Target	Clone	Fluochrome		Company
PD1	29F.1A12	BV421		Biolegend
PD1	HA2-7B1	Vioblue		Miltenyi
CD4	GK1.5	BV510		Biolegend
Ly6C	HK1.4	BV605		Biolegend
CD8a	53-6.7	BV650		Biolegend
NK1.1	PK136	BV711		Biolegend
CD45	30-F11	BV785		Biolegend
TIM3	REA602	FITC		Miltenyi
FoxP3	FJK-16s	PE-Cy5		Thermo Fisher
CD3	145-2C11	PE-Cy7		Thermo Fisher
CD3	17A2	AF700		Biolegend
KI67	16A8	AF700		Biolegend
GITR	DTA-1	APC		Miltenyi
CD8b	H35-17.2	PE		Thermo Fisher
TIGIT	1G9	PEDazzle594		Biolegend
HVEM	REA275	PE-Cy7		Miltenyi
