# Supplementary material for: Monocyte-derived APCs are central to the response of PD1 checkpoint blockade and provide a therapeutic target for combination therapy
Source: J Immunother Cancer. 2020 Jul 19;8(2):e000588. doi: 10.1136/jitc-2020-000588 (PMC7371367; doi:10.1136/jitc-2020-000588)
Supplement: Supplementary data [file jitc-2020-000588supp003.xlsx]

## Sheet: pDC
	logFC	AveExpr	t	P.Value	adj.P.Val	B
GZMB	12.0263	2.05693	171.385	0	0	2406.49
PTPRS	7.16385	1.23284	152.788	0	0	2229.81
IGJ	11.604	2.07178	147.33	0	0	2174.31
AC096579.7	9.03521	1.67003	104.739	0	0	1669
LILRA4	9.53705	2.11615	83.2986	0	0	1352.23
CLIC3	8.1695	1.49045	81.4376	0	0	1322.29
RP11-38J22.6	7.73871	1.37482	79.7401	0	0	1294.62
TSPAN13	7.59913	1.45114	76.9848	0	0	1248.96
ITM2C	8.20524	1.77037	76.1485	0	0	1234.91
IGKC	8.32798	1.76363	73.8438	0	0	1195.75
MZB1	7.17216	1.20828	71.2765	0	0	1151.35
SMPD3	6.86572	1.26658	68.119	0	0	1095.6
C1orf186	4.91585	0.918289	65.4442	0	0	1047.4
DERL3	6.25271	1.14687	60.1377	0	0	949.168
FAM129C	5.21227	0.8748	59.5654	0	0	938.373
IGHM	6.28653	1.08911	58.1648	0	0	911.79
TLR9	4.72023	0.83451	54.9195	0	0	849.354
SPIB	7.45291	1.96747	54.7947	0	0	846.93
IRF4	7.43929	2.00619	54.1657	0	0	834.691
C12orf75	6.7571	1.35995	54.0417	0	0	832.274
ZFAT	6.2502	1.3915	50.7802	0	0	768.151
CXCR3	6.15804	1.30539	47.6435	1.75322224867337e-312	8.99262755789547e-310	705.618
PACSIN1	3.58839	0.584607	45.5889	1.64868e-294	8.13117e-292	664.289
PLD4	7.73296	2.7886	44.3708	8.3036e-284	3.9436e-281	639.679
TCL1A	6.31552	1.03831	43.3546	7.36493e-275	3.37287e-272	619.103
TRAF4	3.96678	0.88419	43.2959	2.42329e-274	1.07151e-271	617.914
BCL11A	7.07744	3.13321	42.8547	1.88283e-270	7.78825e-268	608.967
IL3RA	6.60692	2.38114	41.5705	4.05256e-259	1.62394e-256	582.906
PTPRCAP	5.50617	1.2772	41.2738	1.68606e-256	6.55163e-254	576.883
LIME1	5.23066	1.10865	40.7266	1.14754e-251	4.08748e-249	565.769
MYBL2	4.141	0.779728	40.2774	1.06503e-247	3.69103e-245	556.646
SEL1L3	5.83383	1.83074	39.832	9.12318e-244	3.07859e-241	547.602
SLC15A4	5.50602	1.80931	38.9616	4.40362e-236	1.44789e-233	529.932
LINC00996	4.30104	0.801487	38.9399	6.84462e-236	2.19422e-233	529.492
DNASE1L3	5.31713	1.17751	38.3458	1.19118e-230	3.72548e-228	517.44
PLAC8	8.38593	3.53206	37.6007	4.38378e-224	1.33841e-221	502.341
SERPINF1	8.10904	3.36204	37.4608	7.47743e-223	2.22984e-220	499.509
TPM2	4.62159	0.909589	36.9605	1.88706e-218	5.49949e-216	489.386
TCF4	6.57124	3.30212	36.5314	1.11442e-214	3.10655e-212	480.713
RP4-583P15.14	4.14327	0.875635	36.2597	2.7059e-212	7.2287e-210	475.228
SLA2	3.63227	0.653851	36.0319	2.69472e-210	7.05193e-208	470.633
CARD11	4.41078	1.20796	36.0251	3.08998e-210	7.92458e-208	470.497
UGCG	5.55228	2.42557	35.8824	5.51424e-209	1.38645e-206	467.619
RUNX2	4.50663	1.33812	35.825	1.75648e-208	4.33141e-206	466.462
PTGDS	6.05564	1.07285	34.7809	2.37633e-199	5.74936e-197	445.464
SIDT1	4.45629	0.97237	34.7511	4.32886e-199	1.02795e-196	444.865
RP11-117D22.2	4.52301	0.919825	33.7322	3.21025e-190	7.35089e-188	424.468
CCDC50	5.28729	2.56237	32.8591	1.17141e-182	2.58982e-180	407.08
PHEX	2.64883	0.441923	32.2237	3.5173e-177	7.27458e-175	394.485
CYB561A3	6.83851	3.77944	32.1147	3.04393e-176	6.19561e-174	392.33
PFKFB2	4.34446	1.40144	32.0799	6.06068e-176	1.21431e-173	391.642
IRF7	6.82473	4.60326	30.5849	3.58883e-163	6.8686e-161	362.275
PIM2	5.41839	2.71701	30.5032	1.77085e-162	3.33935e-160	360.681
SLC44A2	5.15309	1.78278	29.4686	9.6015e-154	1.73408e-151	340.6
RASD1	3.73188	0.836149	28.8853	7.34673e-149	1.29051e-146	329.372
NAPSB	6.21836	4.62489	28.8755	8.87105e-149	1.53721e-146	329.184
EGLN3	5.00761	2.03809	28.5984	1.80317e-146	3.04237e-144	323.878
CHAF1A	3.59802	1.08441	28.4765	1.859e-145	3.09584e-143	321.549
TTC24	2.35652	0.401385	28.3758	1.27354e-144	2.09366e-142	319.627
ERN1	4.75701	2.06238	28.3098	4.4987e-144	7.30213e-142	318.367
KIAA0226	4.65909	2.87016	28.1386	1.17514e-142	1.88359e-140	315.11
LY9	4.11861	1.14125	28.0714	4.22577e-142	6.68976e-140	313.832
SLC7A5	4.42939	1.9802	27.6912	5.76721e-139	8.70035e-137	306.625
SLC38A1	3.88192	1.43599	27.681	6.99126e-139	1.04243e-136	306.433
SEMA7A	3.28436	0.838676	27.3386	4.5059e-136	6.49204e-134	299.975
SOX4	4.30748	1.91978	26.9697	4.63189e-133	6.52689e-131	293.051
COBLL1	2.63544	0.500683	26.9174	1.23575e-132	1.72239e-130	292.072
LTB	4.54651	1.47798	26.6583	1.57012e-130	2.14188e-128	287.235
PPP1R14B	3.80757	1.28493	26.4096	1.61568e-128	2.11407e-126	282.61
SELL	5.8356	3.4633	26.2572	2.74371e-127	3.51826e-125	279.782
DUSP5	3.29497	1.13886	26.0648	9.68665e-126	1.21776e-123	276.225
NEK8	2.83525	0.672739	26.0211	2.17143e-125	2.70332e-123	275.419
STAP1	2.89394	0.599045	25.6194	3.55797e-122	4.34513e-120	268.031
AMIGO3	2.75046	0.751391	25.4831	4.33759e-121	5.24725e-119	265.534
POLB	5.24945	2.5434	25.3666	3.65508e-120	4.38028e-118	263.407
GPR114	3.01529	0.758404	24.96	6.02935e-117	7.15874e-115	256.012
GPM6B	2.66083	0.560659	24.9498	7.25895e-117	8.53959e-115	255.827
TNFRSF21	3.76755	1.74169	24.8957	1.93525e-116	2.25597e-114	254.848
IRF8	5.33929	6.49525	24.6385	2.0326e-114	2.30655e-112	250.203
CYFIP2	4.07481	1.56016	24.6277	2.46888e-114	2.77706e-112	250.009
TMIGD2	2.29154	0.401131	24.1155	2.43531e-110	2.6242e-108	240.83
BLNK	4.54076	2.16131	24.1097	2.70374e-110	2.88917e-108	240.726
C10orf118	3.67026	1.5852	23.8826	1.54949e-108	1.62862e-106	236.685
OFD1	3.96703	1.78334	23.718	2.87908e-107	3.0015e-105	233.769
ZDHHC17	3.82678	1.54076	23.4297	4.69845e-105	4.81986e-103	228.685
NOTCH4	3.1477	0.952044	23.2486	1.13428e-103	1.13632e-101	225.507
FCHSD2	3.82885	2.24786	23.0979	1.58953e-102	1.56789e-100	222.873
GNG7	2.56065	0.806372	23.0691	2.63302e-102	2.55782e-100	222.369
HS3ST3B1	3.38871	1.30901	22.7463	7.27912e-100	6.96568e-98	216.759
ADAM19	4.04325	2.93533	22.4487	1.25233e-97	1.13891e-95	211.623
AC023590.1	2.79931	0.713918	22.3101	1.36007e-96	1.20277e-94	209.243
INPP4A	3.09921	1.39034	22.1507	2.09066e-95	1.81139e-93	206.517
P2RY14	3.27687	1.30781	21.7427	2.17541e-92	1.82322e-90	199.585
SIT1	2.46441	0.543247	21.6312	1.4347e-91	1.18692e-89	197.703
FLNB	3.29613	1.40706	21.4025	6.75975e-90	5.48609e-88	193.86
GAB1	2.94227	1.0294	21.307	3.353e-89	2.70412e-87	192.262
KIAA0226L	3.69729	1.61987	21.2037	1.88637e-88	1.50242e-86	190.539
TSPYL2	3.63776	1.60874	21.1066	9.53778e-88	7.54956e-86	188.922
OGT	4.07403	3.48036	21.0845	1.37858e-87	1.08451e-85	188.555
ABHD15	2.30029	0.633785	20.8526	6.46627e-86	4.995e-84	184.716
RAB11FIP1	3.81017	3.09072	20.6544	1.70427e-84	1.25597e-82	181.452
ST6GALNAC4	3.79769	2.01461	20.6172	3.13921e-84	2.30023e-82	180.843
TXNDC5	2.68646	0.911638	20.526	1.40267e-83	1.02196e-81	179.35
PMEPA1	2.40839	0.715472	20.5225	1.48545e-83	1.07615e-81	179.293
PPP1R16B	1.7874	0.413918	20.3818	1.48454e-82	1.04595e-80	176.997
ALOX5AP	5.29247	5.63019	20.3139	4.49555e-82	3.13296e-80	175.892
ADC	2.38409	0.561137	20.2823	7.51364e-82	5.20797e-80	175.379
DCK	3.7258	2.45073	20.1602	5.4652e-81	3.72767e-79	173.4
SUSD1	3.26508	1.19185	20.1275	9.28382e-81	6.29875e-79	172.872
PLA2G16	3.49898	1.45089	20.1054	1.32806e-80	8.91606e-79	172.515
NUCB2	4.04703	2.01859	20.0223	5.09358e-80	3.36675e-78	171.174
NR3C1	4.17377	2.9708	19.9859	9.16388e-80	5.99533e-78	170.588
PTK7	1.71654	0.319069	19.9467	1.72446e-79	1.12247e-77	169.958
HIVEP1	3.09309	1.52823	19.8038	1.71673e-78	1.0952e-76	167.666
AFF3	2.54658	0.862116	19.7837	2.37153e-78	1.50545e-76	167.344
RABGAP1L	3.98743	2.65304	19.7416	4.65037e-78	2.92312e-76	166.672
IFNLR1	1.92379	0.453422	19.6634	1.62572e-77	1.01197e-75	165.424
APP	3.7486	2.80904	19.613	3.63309e-77	2.25058e-75	164.622
ATP2A3	2.2931	0.825574	18.9949	6.30658e-73	3.74395e-71	154.888
PPM1K	3.06167	1.39929	18.6706	9.77089e-71	5.61848e-69	149.86
TMEM8B	1.6774	0.365502	18.6281	1.8842e-70	1.07383e-68	149.205
SLC20A1	4.18229	4.66663	18.612	2.41384e-70	1.36959e-68	148.958
VIMP	4.16341	3.92085	18.5754	4.24523e-70	2.35656e-68	148.396
SNRPN	2.83169	1.56716	18.4212	4.54063e-69	2.47764e-67	146.033
MAPKAPK2	1.65406	0.677636	18.3756	9.13406e-69	4.92126e-67	145.336
ST3GAL4	2.68145	0.965574	18.3214	2.09173e-68	1.11296e-66	144.51
MPEG1	3.60085	5.33082	18.2731	4.36595e-68	2.31341e-66	143.777
SPON2	2.16745	0.589456	18.2346	7.85284e-68	4.12693e-66	143.191
MAP2K6	2.7297	0.865085	18.212	1.1084e-67	5.80124e-66	142.848
NAPSA	1.78129	0.484571	18.1882	1.59176e-67	8.29719e-66	142.487
FUT7	1.83376	0.508809	18.0399	1.50705e-66	7.72998e-65	140.246
USP11	3.3777	2.08547	17.9764	3.92636e-66	1.99792e-64	139.292
HIGD1A	4.06874	4.22104	17.9077	1.10522e-65	5.60167e-64	138.26
HYOU1	3.06771	2.49419	17.765	9.41041e-65	4.67712e-63	136.126
SETBP1	1.50229	0.410079	17.738	1.40961e-64	6.97892e-63	135.723
SMG1	2.53137	4.51196	17.7024	2.39616e-64	1.18177e-62	135.194
GAPT	3.4077	1.56018	17.4915	5.51642e-63	2.63944e-61	132.068
IL18R1	1.94182	0.600635	17.4341	1.28938e-62	6.05629e-61	131.222
MAGED1	2.62685	1.10337	17.3913	2.42526e-62	1.13088e-60	130.592
SNURF	2.98129	1.7782	17.3636	3.64856e-62	1.69513e-60	130.185
STAT4	2.76941	1.27496	17.2509	1.91039e-61	8.81186e-60	128.536
TLR7	2.58692	1.35078	17.2287	2.64589e-61	1.21172e-59	128.211
CBFA2T3	2.06537	0.958144	17.1448	9.03e-61	4.07717e-59	126.988
STRBP	1.63106	0.435224	17.139	9.83375e-61	4.4245e-59	126.903
SIK1	2.78323	2.5853	17.0755	2.48028e-60	1.09294e-58	125.981
AC006129.2	1.50492	0.302461	17.0512	3.53688e-60	1.5479e-58	125.627
GPR183	4.57847	7.00615	17.0018	7.24744e-60	3.16102e-58	124.912
TEX2	2.23668	0.995653	16.999	7.55055e-60	3.28206e-58	124.872
FZD3	1.49651	0.355774	16.9331	1.96181e-59	8.47011e-58	123.92
GAS6	2.89525	1.68736	16.8774	4.39106e-59	1.88316e-57	123.117
SEC61A2	1.98571	0.702116	16.8079	1.19727e-58	5.03363e-57	122.118
LDLRAD4	3.36244	2.78079	16.7978	1.38492e-58	5.80354e-57	121.973
BCL2L11	3.39144	2.81634	16.7741	1.94531e-58	8.12533e-57	121.634
SLAMF7	3.91957	3.6293	16.7065	5.13643e-58	2.11783e-56	120.667
HHAT	1.42024	0.316004	16.6228	1.7035e-57	7.00127e-56	119.473
CD2AP	2.18201	1.04328	16.6168	1.85742e-57	7.6095e-56	119.386
IGFBP3	1.43536	0.252273	16.5445	5.20588e-57	2.1125e-55	118.36
IDH3A	3.70529	3.19371	16.5303	6.37435e-57	2.57849e-55	118.158
GRAMD1B	1.52278	0.439262	16.5118	8.29076e-57	3.34316e-55	117.896
PRMT10	2.84418	2.14425	16.5045	9.19654e-57	3.69678e-55	117.793
SNHG14	2.02346	0.683978	16.4158	3.24023e-56	1.29036e-54	116.538
PTP4A3	2.04293	0.574807	16.3872	4.85661e-56	1.92211e-54	116.135
HERPUD1	3.81605	7.11713	16.3843	5.0647e-56	1.9983e-54	116.093
EPS8L2	1.33947	0.258767	16.3383	9.70084e-56	3.81576e-54	115.446
CHST12	2.34409	0.999323	16.1237	1.97712e-54	7.56795e-53	112.443
NREP	2.62524	1.18842	16.1224	2.01312e-54	7.68281e-53	112.425
SMC6	2.20291	0.996663	16.0412	6.2568e-54	2.3737e-52	111.295
TNFRSF17	1.34071	0.220937	15.9596	1.9456e-53	7.31627e-52	110.166
RP11-72I8.1	2.38036	3.45611	15.9279	3.02263e-53	1.12672e-51	109.727
FAM213A	2.54027	1.4206	15.8918	4.97843e-53	1.82918e-51	109.23
NPIPB4	2.00719	6.58441	15.8416	9.96451e-53	3.65071e-51	108.539
GPX7	2.01936	0.659571	15.8196	1.35022e-52	4.91872e-51	108.236
MCC	1.1377	0.283906	15.7707	2.64772e-52	9.59087e-51	107.565
BCL7A	1.29118	0.375719	15.6654	1.12437e-51	4.01609e-50	106.125
MALAT1	1.15071	10.6463	15.6603	1.20544e-51	4.29369e-50	106.056
B4GALT1	2.265	5.80519	15.6091	2.42939e-51	8.58185e-50	105.358
AHI1	2.68675	1.54727	15.5604	4.71846e-51	1.64415e-49	104.697
TNFSF9	2.05343	0.962116	15.5547	5.10262e-51	1.77319e-49	104.619
ZNF10	1.89794	0.67604	15.4113	3.57498e-50	1.22901e-48	102.681
TTC39C	2.40244	1.78513	15.4109	3.59223e-50	1.23164e-48	102.676
SPCS1	3.63866	5.62634	15.395	4.4566e-50	1.51987e-48	102.461
RGPD5	3.09962	3.79681	15.3451	8.73476e-50	2.9553e-48	101.791
BLK	1.12835	0.209232	15.3433	8.94989e-50	3.02012e-48	101.767
NRP1	2.80602	3.38022	15.189	7.11644e-49	2.37641e-47	99.7025
SEC61B	3.48189	6.39501	15.1201	1.78793e-48	5.86357e-47	98.7854
MCOLN2	2.5326	1.63958	15.0841	2.88657e-48	9.44246e-47	98.3085
RP11-324I22.3	1.89831	0.626572	15.033	5.70028e-48	1.85992e-46	97.6311
N4BP2L1	3.15361	2.66737	15.0255	6.29692e-48	2.03389e-46	97.532
RP11-302F12.10	1.07508	0.258918	14.9055	3.08406e-47	9.83754e-46	95.9504
TP53I13	2.94749	2.1192	14.8457	6.77618e-47	2.15077e-45	95.1668
CD320	1.85267	0.617793	14.8337	7.93741e-47	2.50077e-45	95.0094
TOX2	1.09291	0.198229	14.8168	9.91394e-47	3.10823e-45	94.7881
ARID3A	1.8667	1.23313	14.7201	3.51859e-46	1.0872e-44	93.5273
NR4A3	3.01772	3.66784	14.7079	4.12671e-46	1.26899e-44	93.3686
IRF2BP2	2.55595	3.23376	14.6818	5.80156e-46	1.77975e-44	93.0295
CXCR4	4.03456	7.2535	14.6544	8.29776e-46	2.52745e-44	92.6734
PLP2	3.34489	5.23721	14.6544	8.29804e-46	2.52745e-44	92.6733
USP24	1.96375	1.33213	14.5117	5.28837e-45	1.58441e-43	90.8301
ZC3HAV1	2.69023	4.03583	14.4688	9.20782e-45	2.74586e-43	90.2782
CSF2RB	2.80587	3.46066	14.4125	1.90224e-44	5.62038e-43	89.5561
STMN1	2.83732	1.82799	14.343	4.64198e-44	1.35282e-42	88.6684
PDCD4	3.08334	3.80113	14.2825	1.00676e-43	2.88807e-42	87.898
LPIN1	2.38858	1.55429	14.2132	2.43596e-43	6.89543e-42	87.0188
KIAA0125	1.15482	0.227249	14.2069	2.63982e-43	7.43965e-42	86.9388
YPEL5	3.28734	5.03076	14.1706	4.18291e-43	1.17112e-41	86.4808
FCRLA	1.27489	0.27081	14.1222	7.73413e-43	2.13739e-41	85.8693
NPIPB5	2.19307	6.22519	14.0928	1.1213e-42	3.07233e-41	85.4997
BIK	1.42938	0.343077	14.0617	1.6609e-42	4.53143e-41	85.1089
VEGFB	2.1436	1.0812	14.0589	1.72165e-42	4.68719e-41	85.0731
RGS13	1.13734	0.29234	14.0468	2.00464e-42	5.44609e-41	84.9217
PNOC	1.27647	0.275145	14.0114	3.13287e-42	8.42196e-41	84.4775
RRBP1	2.57566	2.6363	13.9945	3.87473e-42	1.03512e-40	84.2661
CCDC69	2.28536	1.37285	13.9621	5.81664e-42	1.53787e-40	83.8619
ARL4C	2.47107	2.09931	13.931	8.5944e-42	2.26296e-40	83.4736
PALD1	1.9891	1.11138	13.9306	8.64151e-42	2.2707e-40	83.4681
CLN8	3.03216	2.65637	13.9102	1.11527e-41	2.91265e-40	83.2144
RHOH	2.22125	1.2153	13.8429	2.58669e-41	6.72801e-40	82.3775
PAPD7	1.72925	0.789456	13.841	2.64748e-41	6.87219e-40	82.3544
CTD-2547E10.2	2.50007	3.47185	13.8163	3.60299e-41	9.33357e-40	82.0478
RECQL5	2.22057	1.13716	13.7971	4.57038e-41	1.1792e-39	81.8112
RANBP2	2.68922	3.4499	13.7914	4.90933e-41	1.2641e-39	81.7401
ATP13A2	1.85614	0.831439	13.766	6.72974e-41	1.71903e-39	81.4264
MAST3	2.16606	1.68961	13.7315	1.03225e-40	2.6211e-39	81.0008
RNF122	1.50326	0.916802	13.7225	1.15395e-40	2.92434e-39	80.89
STAG3L3	2.67838	2.08111	13.7171	1.23363e-40	3.12009e-39	80.8236
HSP90B1	2.76306	6.78563	13.7144	1.27511e-40	3.21864e-39	80.7907
RHOF	2.38091	1.99007	13.6667	2.30126e-40	5.76349e-39	80.2034
PAPLN	1.5307	0.642195	13.6512	2.78502e-40	6.94791e-39	80.0137
ADA	2.60289	1.48173	13.6003	5.2162e-40	1.28877e-38	79.3895
RP11-1100L3.7	2.4548	1.80669	13.5977	5.38243e-40	1.32729e-38	79.3583
NPC1	2.84284	2.96144	13.5358	1.15e-39	2.80884e-38	78.6033
ETV3	2.58117	2.3739	13.5332	1.18765e-39	2.89529e-38	78.5712
AC141586.5	1.86391	1.12698	13.4942	1.91457e-39	4.64094e-38	78.0963
C12orf44	2.85641	2.28204	13.4601	2.90109e-39	6.99261e-38	77.683
STAMBPL1	1.83649	0.896143	13.4455	3.46875e-39	8.31398e-38	77.5053
ABCA7	2.2393	1.43539	13.4117	5.23489e-39	1.2454e-37	77.0961
WDFY4	2.62432	3.26368	13.3298	1.41267e-38	3.33604e-37	76.1089
MKLN1-AS1	2.78687	2.6281	13.3211	1.57055e-38	3.69527e-37	76.0035
CCDC138	1.23775	0.410375	13.281	2.54823e-38	5.97366e-37	75.5223
HVCN1	2.64034	2.39141	13.1914	7.49362e-38	1.74393e-36	74.4498
SEPHS1	2.24458	1.26278	13.1764	8.97043e-38	2.08007e-36	74.271
HNRNPH1	1.19334	8.69155	13.125	1.65958e-37	3.81376e-36	73.6593
C9orf142	3.20525	3.91943	13.1014	2.20033e-37	5.03837e-36	73.3789
AC010441.1	2.66266	2.03655	13.0388	4.64107e-37	1.05332e-35	72.637
RP11-383F6.1	1.72913	0.632424	13.036	4.79365e-37	1.08603e-35	72.6048
RGS1	4.09694	6.76225	12.9158	1.99202e-36	4.45011e-35	71.1888
ANKRD36	1.81124	1.33588	12.9024	2.33236e-36	5.17438e-35	71.032
SRSF6	2.29057	5.71028	12.8839	2.90179e-36	6.41547e-35	70.8149
TARBP1	1.81742	0.853888	12.8777	3.12187e-36	6.89015e-35	70.7422
RP11-110I1.6	1.93975	1.37021	12.8395	4.89037e-36	1.07563e-34	70.2961
P2RX1	2.28578	1.44519	12.8092	6.97843e-36	1.52704e-34	69.9427
DAAM1	1.66279	0.904734	12.7866	9.09293e-36	1.97625e-34	69.6797
AC006978.6	1.57917	0.562376	12.737	1.62307e-35	3.49793e-34	69.1038
SH2D3C	2.32017	1.69083	12.6066	7.39045e-35	1.55357e-33	67.5973
ZNF589	1.8348	0.991935	12.5929	8.65875e-35	1.80833e-33	67.44
CNP	2.67605	3.2397	12.5902	8.92719e-35	1.86136e-33	67.4096
CREB3L2	2.04328	2.10837	12.5883	9.12966e-35	1.8974e-33	67.3873
RBM38	1.33325	0.540333	12.5495	1.42936e-34	2.942e-33	66.9419
DAPK2	1.15107	0.328549	12.5282	1.82649e-34	3.74738e-33	66.6983
ULK1	1.31703	0.566318	12.5252	1.89046e-34	3.87243e-33	66.6641
GOLGA8B	1.30969	0.543646	12.4959	2.64867e-34	5.40826e-33	66.329
CCR7	1.79574	0.678622	12.4461	4.68628e-34	9.53844e-33	65.762
IFI44L	2.98179	2.45971	12.415	6.68792e-34	1.35695e-32	65.4087
RPLP0P6	1.34256	3.89484	12.4111	6.99282e-34	1.41434e-32	65.3644
RP1-168P16.3	1.92691	1.18181	12.3977	8.15375e-34	1.64137e-32	65.2118
MDFIC	1.46985	0.836892	12.381	9.85892e-34	1.98152e-32	65.0231
RASSF2	2.30709	2.89976	12.374	1.06849e-33	2.14416e-32	64.9432
TBC1D32	1.13027	0.372007	12.3205	1.9632e-33	3.9151e-32	64.3388
MALT1	1.70986	1.16843	12.2438	4.68351e-33	9.23949e-32	63.4751
MTMR1	1.49842	0.693398	12.2431	4.7163e-33	9.28987e-32	63.4681
ZNF165	1.24312	0.418615	12.2161	6.40213e-33	1.25527e-31	63.1646
RNASE6	3.14813	5.34741	12.2133	6.60415e-33	1.2929e-31	63.1337
GRASP	1.94992	1.60975	12.2014	7.5511e-33	1.47603e-31	63.0006
REPIN1	1.42472	0.662443	12.1661	1.12333e-32	2.18912e-31	62.6061
RP4-717I23.3	2.40052	1.60489	12.1636	1.1556e-32	2.2452e-31	62.5779
MX1	2.98181	3.16941	12.1265	1.75195e-32	3.37823e-31	62.1646
SELPLG	2.84744	5.13912	12.1072	2.17693e-32	4.18513e-31	61.9489
GNB5	1.48609	0.616929	12.0492	4.15804e-32	7.93431e-31	61.3062
GPR65	2.8146	2.97044	12.0479	4.22119e-32	8.04283e-31	61.2912
ZNRF2	1.20867	0.564559	12.0421	4.5042e-32	8.56934e-31	61.2268
MDN1	1.52851	0.870417	12.0337	4.94497e-32	9.38008e-31	61.1341
NPIPB3	1.81188	5.20689	12.0249	5.4561e-32	1.03344e-30	61.0364
PRMT7	2.14599	1.36158	12.0199	5.76385e-32	1.09012e-30	60.9819
PRKCB	1.93905	2.06579	12.002	7.03674e-32	1.32694e-30	60.7837
FAM214A	1.55649	0.705	12.0004	7.16264e-32	1.3487e-30	60.7661
OCIAD2	1.60778	0.654389	11.9933	7.74959e-32	1.45708e-30	60.6879
HIST1H2AC	2.10652	1.24785	11.9867	8.3433e-32	1.56642e-30	60.6146
SPNS3	1.46014	0.607781	11.9756	9.43749e-32	1.76667e-30	60.4922
RAP1GAP2	1.40877	0.755284	11.9529	1.21301e-31	2.26081e-30	60.2429
STAG3L1	1.74145	1.35698	11.9436	1.34474e-31	2.49185e-30	60.1406
CBX6	1.82861	3.44375	11.9165	1.8157e-31	3.34505e-30	59.8424
ANKRD11	1.97929	2.34967	11.9136	1.87482e-31	3.44425e-30	59.8106
RP1-313I6.12	1.3365	0.544504	11.869	3.06324e-31	5.59544e-30	59.323
DSTN	2.56099	3.67106	11.8409	4.17345e-31	7.56946e-30	59.016
AP000476.1	1.0806	0.373857	11.8234	5.05944e-31	9.13763e-30	58.8248
SLC12A2	1.16205	0.620695	11.7245	1.49209e-30	2.66107e-29	57.751
DDX24	2.55259	3.43054	11.7063	1.81972e-30	3.23637e-29	57.554
MAP4K1	2.12722	1.93057	11.6951	2.05541e-30	3.64545e-29	57.433
ABCA2	1.34481	0.62162	11.6741	2.58323e-30	4.55413e-29	57.2061
CDCA7L	1.85062	1.13213	11.6504	3.34158e-30	5.83776e-29	56.9506
CTNS	2.1304	1.82583	11.568	8.14813e-30	1.40624e-28	56.0658
ZCCHC11	2.03091	1.49771	11.5537	9.49837e-30	1.63487e-28	55.9136
RP11-347C12.1	1.56188	2.33398	11.453	2.80001e-29	4.74927e-28	54.8406
EMB	2.32847	2.2399	11.4433	3.10336e-29	5.243e-28	54.7385
DHTKD1	1.65903	1.06453	11.4424	3.13474e-29	5.28904e-28	54.7285
ZDHHC4	2.15592	1.57295	11.4243	3.80275e-29	6.39929e-28	54.5368
FMNL3	1.84091	2.60079	11.423	3.85746e-29	6.48287e-28	54.5227
STAG3L2	1.94435	1.7133	11.4129	4.29592e-29	7.21029e-28	54.4158
SUZ12P	1.43855	0.772733	11.4111	4.37564e-29	7.33449e-28	54.3976
PPT2	1.18512	0.40708	11.3673	6.97692e-29	1.16038e-27	53.9346
RPS3AP26	1.53141	3.14741	11.3631	7.29498e-29	1.2117e-27	53.8903
RPS3AP6	1.469	5.40765	11.357	7.78e-29	1.29059e-27	53.8264
TXN	2.56877	5.28235	11.3246	1.09705e-28	1.81281e-27	53.4854
RPS3A	1.35933	10.6131	11.3087	1.29896e-28	2.14094e-27	53.3178
CD4	2.15217	6.61226	11.2937	1.52107e-28	2.5006e-27	53.1612
TTTY15	1.70741	0.908356	11.2678	1.99953e-28	3.2704e-27	52.8898
RBM6	2.35034	5.51891	11.2602	2.16599e-28	3.52469e-27	52.8105
GNL3	2.39596	2.65611	11.2347	2.83518e-28	4.57878e-27	52.5433
SLC35A2	1.78501	1.27878	11.2222	3.23195e-28	5.20645e-27	52.4134
HIST1H2BK	2.53934	2.27719	11.2015	4.0152e-28	6.44391e-27	52.1981
DNAJB9	2.28925	2.24221	11.1699	5.59435e-28	8.93354e-27	51.869
DPP4	1.06365	0.395133	11.1671	5.76111e-28	9.18839e-27	51.8399
CREM	2.99456	4.05035	11.148	7.0355e-28	1.11654e-26	51.6416
SNX29P2	1.16791	1.45297	11.1465	7.14636e-28	1.13273e-26	51.6261
EDEM1	1.95583	3.52607	11.1319	8.31841e-28	1.31525e-26	51.4755
FAM53C	2.12401	2.07954	11.1059	1.0912e-27	1.72109e-26	51.2062
RP11-166B2.1	1.88282	2.42516	11.0925	1.25478e-27	1.96699e-26	51.0677
FUZ	1.37903	0.777533	11.0775	1.46582e-27	2.28943e-26	50.9135
SGSM3	2.35989	2.63699	10.9561	5.14806e-27	7.86812e-26	49.6675
N4BP2	1.38753	0.83393	10.9411	6.00888e-27	9.11856e-26	49.5141
ALG2	2.24939	2.41926	10.8851	1.06735e-26	1.60641e-25	48.9443
ST3GAL2	1.34372	0.817763	10.73	5.17772e-26	7.65789e-25	47.3785
SH3KBP1	2.2778	3.34501	10.6857	8.0962e-26	1.18513e-24	46.9353
RNF5P1	1.19519	0.850333	10.6811	8.48462e-26	1.23916e-24	46.8888
HCG18	1.72855	1.35655	10.65	1.16008e-25	1.69042e-24	46.5787
ERP29	2.36646	5.04351	10.6463	1.20395e-25	1.75236e-24	46.5419
RP11-325K4.2	1.11453	0.420738	10.6304	1.41149e-25	2.04284e-24	46.3842
C3orf58	2.1988	2.64476	10.6129	1.68306e-25	2.42766e-24	46.2098
PI4KA	2.06448	2.39929	10.5974	1.96641e-25	2.81735e-24	46.0556
PARP10	1.91728	1.65833	10.5593	2.87682e-25	4.09883e-24	45.6784
RPL13AP5	1.2658	4.38281	10.5507	3.13491e-25	4.45171e-24	45.5933
DDX5	1.15594	9.26636	10.5034	5.01882e-25	7.11119e-24	45.1269
CDYL	1.18479	0.609232	10.4296	1.04191e-24	1.45856e-23	44.403
KCTD5	1.43482	0.890865	10.404	1.34207e-24	1.87262e-23	44.1521
ARHGAP24	1.80517	1.18435	10.3926	1.50076e-24	2.08271e-23	44.0413
RP3-508I15.21	1.40763	0.700762	10.3894	1.54965e-24	2.14824e-23	44.0096
SLC35E2B	1.51473	1.31693	10.3455	2.38341e-24	3.27924e-23	43.583
SLC7A6	2.00054	2.01063	10.3182	3.11581e-24	4.25949e-23	43.3175
GALNT3	1.29255	0.676463	10.3015	3.66793e-24	5.0036e-23	43.1559
USP36	2.2098	3.2505	10.2858	4.27555e-24	5.80778e-23	43.004
SMG1P1	1.94233	4.26333	10.2456	6.32595e-24	8.55672e-23	42.6159
RP11-677O4.6	1.49382	1.10308	10.2224	7.92464e-24	1.06741e-22	42.3927
BTAF1	1.81677	2.2114	10.2199	8.11853e-24	1.09238e-22	42.3688
BTLA	1.15797	0.506953	10.2047	9.40936e-24	1.26342e-22	42.2226
TRIM22	2.46778	5.07109	10.1674	1.34929e-23	1.80229e-22	41.8655
SH2B3	1.97048	2.95932	10.0975	2.64542e-23	3.48636e-22	41.1987
AREG	2.70408	3.07592	10.0816	3.08229e-23	4.04961e-22	41.0473
LETM1	1.43362	1.79105	10.0609	3.7573e-23	4.91631e-22	40.8512
LILRB4	2.25976	6.14633	10.0515	4.1124e-23	5.35907e-22	40.7618
DANCR	1.91505	1.38754	10.0472	4.2822e-23	5.57468e-22	40.7217
UBE2J1	1.84291	2.49961	10.0456	4.34886e-23	5.65572e-22	40.7064
CENPC	1.5157	1.29729	9.98082	8.06688e-23	1.03235e-21	40.0946
TP53I11	1.98875	2.41762	9.97656	8.3996e-23	1.07386e-21	40.0546
RP11-138A9.2	2.09104	2.84299	9.97121	8.83787e-23	1.12877e-21	40.0042
CYSLTR1	1.42122	0.935689	9.95594	1.02164e-22	1.30094e-21	39.8607
RGPD6	1.42886	1.63761	9.92395	1.38318e-22	1.75262e-21	39.5607
C12orf23	1.38165	0.982449	9.90764	1.6137e-22	2.04068e-21	39.4081
AC159540.1	1.06549	0.56705	9.89724	1.78021e-22	2.24903e-21	39.3109
PIK3CG	1.56728	1.51266	9.89453	1.82628e-22	2.30496e-21	39.2856
RNF126	1.60125	1.24047	9.87826	2.12917e-22	2.67933e-21	39.1337
ANKRD36B	1.43095	1.14716	9.87085	2.28306e-22	2.86736e-21	39.0646
ZNF331	2.66063	4.67548	9.85768	2.58428e-22	3.23615e-21	38.9419
ANKRD36C	1.46823	1.16345	9.85276	2.70656e-22	3.38267e-21	38.8961
RUFY4	1.37443	0.788482	9.84885	2.80787e-22	3.49906e-21	38.8597
EIF2AK4	1.75657	1.85317	9.83087	3.32422e-22	4.12248e-21	38.6926
CTB-131B5.2	1.27318	0.756421	9.80564	4.21107e-22	5.20217e-21	38.4586
RP11-231C14.4	1.80393	3.54439	9.80354	4.29464e-22	5.30031e-21	38.4391
IGF2R	1.35927	1.30465	9.76871	5.94668e-22	7.30405e-21	38.117
MDM4	1.99535	3.96421	9.75427	6.80321e-22	8.33215e-21	37.9838
CDC42SE2	1.94845	4.2943	9.73477	8.15791e-22	9.96275e-21	37.8041
P2RY6	2.11137	2.38496	9.70066	1.11985e-21	1.3637e-20	37.4905
ANKRD36BP1	2.16164	3.8484	9.69475	1.18293e-21	1.43779e-20	37.4363
NUP210	1.53585	1.6081	9.67918	1.3664e-21	1.65765e-20	37.2936
ARID3B	1.36977	1.17738	9.6541	1.72301e-21	2.08043e-20	37.0641
DCPS	1.87973	1.65121	9.6523	1.75186e-21	2.11328e-20	37.0477
NBPF10	1.50083	2.96097	9.62393	2.27561e-21	2.73735e-20	36.7889
SLC25A45	1.52508	1.39784	9.60763	2.64395e-21	3.16263e-20	36.6404
RPLP0	1.27809	9.86799	9.59478	2.97537e-21	3.55575e-20	36.5236
EIF4A3	2.35005	5.74712	9.57303	3.63271e-21	4.32118e-20	36.3261
TASP1	1.32147	0.772461	9.55694	4.20963e-21	4.99354e-20	36.1803
AMICA1	2.49275	5.6478	9.55518	4.27768e-21	5.06957e-20	36.1644
PRPF40B	1.86815	2.78105	9.49535	7.38514e-21	8.66419e-20	35.6242
TATDN3	1.85126	1.69479	9.48322	8.24731e-21	9.65801e-20	35.515
KPTN	1.19101	0.588265	9.48286	8.27424e-21	9.68071e-20	35.5118
TRGV3	1.14076	0.567854	9.46782	9.48504e-21	1.1067e-19	35.3767
TBL1XR1	1.70532	3.20108	9.45443	1.07103e-20	1.24626e-19	35.2565
SLC25A29	1.13817	0.61078	9.43099	1.32442e-20	1.53832e-19	35.0465
JAZF1	1.23547	0.859891	9.39719	1.79727e-20	2.07625e-19	34.7445
DDIT4	2.66862	5.90274	9.39337	1.86028e-20	2.14711e-19	34.7105
POLR2A	1.82373	3.81536	9.31161	3.87711e-20	4.41529e-19	33.9843
LGMN	2.50412	3.81478	9.24673	6.91563e-20	7.79939e-19	33.4121
TNRC6B	1.57076	2.66982	9.22607	8.30871e-20	9.33765e-19	33.2307
SVIP	1.07104	0.611276	9.17531	1.30225e-19	1.44704e-18	32.7865
CHD9	2.09247	3.31091	9.15421	1.5687e-19	1.7326e-18	32.6025
RP11-256P1.1	1.38512	1.14555	9.11886	2.14104e-19	2.34454e-18	32.295
ZNF506	1.28397	0.851439	9.11037	2.30682e-19	2.52393e-18	32.2213
PIK3CD	1.70815	2.28573	9.10828	2.34955e-19	2.56629e-18	32.2032
RP11-864N7.2	1.2533	2.92543	9.06342	3.47983e-19	3.77512e-18	31.8151
C12orf45	1.80083	2.05245	9.06187	3.52725e-19	3.82332e-18	31.8017
FYTTD1	1.98919	3.49845	9.02751	4.75966e-19	5.13315e-18	31.5056
CTC1	1.52716	1.25057	9.02036	5.06515e-19	5.45802e-18	31.4441
UBL7	2.14541	3.0949	9.01158	5.46728e-19	5.87589e-18	31.3686
DSN1	1.20062	0.763972	8.98745	6.74115e-19	7.20348e-18	31.1617
MSL2	1.29318	1.07134	8.97069	7.79493e-19	8.3226e-18	31.0182
ZHX2	1.00724	0.617854	8.96875	7.92692e-19	8.45648e-18	31.0016
PDE4B	2.17574	4.24341	8.8962	1.48209e-18	1.5565e-17	30.3834
CDKN1A	1.95874	5.78439	8.88724	1.60067e-18	1.67281e-17	30.3074
EZR	1.92927	5.65098	8.8777	1.73716e-18	1.81102e-17	30.2266
C18orf8	1.90621	2.24866	8.84506	2.29755e-18	2.38362e-17	29.9504
CIDECP	1.5654	1.25718	8.83591	2.4844e-18	2.57538e-17	29.8732
RELL1	1.15072	0.77321	8.83547	2.49381e-18	2.58305e-17	29.8695
CD36	2.28887	3.07369	8.82172	2.80443e-18	2.9001e-17	29.7535
RPL3	1.10763	10.2813	8.80376	3.26816e-18	3.36608e-17	29.6024
ARHGAP17	1.75832	3.19773	8.77597	4.13931e-18	4.22935e-17	29.3691
PDIA4	1.8545	3.87762	8.76859	4.40689e-18	4.49559e-17	29.3072
RP11-138A9.1	1.85344	2.23193	8.76394	4.58421e-18	4.66534e-17	29.2683
ST6GALNAC6	1.08515	0.682025	8.72781	6.2245e-18	6.29469e-17	28.9663
DNAJC4	2.04148	3.27073	8.70256	7.70249e-18	7.77097e-17	28.7559
ACAP1	1.66424	1.73371	8.67965	9.34105e-18	9.41669e-17	28.5655
SLC35E1	1.3349	1.1099	8.67556	9.66758e-18	9.7382e-17	28.5316
SPN	1.78787	2.32519	8.6648	1.05825e-17	1.06264e-16	28.4424
NKG7	1.56976	1.15631	8.66105	1.09209e-17	1.09491e-16	28.4113
PAFAH2	1.07611	0.697177	8.64192	1.28206e-17	1.27837e-16	28.253
IVD	1.69783	1.875	8.63019	1.41431e-17	1.40587e-16	28.1561
NGLY1	1.85755	3.28247	8.60049	1.81253e-17	1.78785e-16	27.9112
CRYZ	1.36314	0.949625	8.55635	2.61698e-17	2.55579e-16	27.5487
HIST2H2AA3	1.49596	2.85091	8.54788	2.80771e-17	2.73789e-16	27.4793
GALNT2	1.44875	1.89582	8.54628	2.84523e-17	2.77237e-16	27.4662
KAT2B	1.20632	0.942406	8.51873	3.57418e-17	3.46422e-16	27.2412
RNF11	1.16695	0.882896	8.51483	3.69133e-17	3.57237e-16	27.2093
ARGLU1	1.4869	4.07931	8.47907	4.95846e-17	4.76987e-16	26.9182
ITCH	1.59118	2.36912	8.45261	6.16385e-17	5.89844e-16	26.7035
RP11-3P17.3	1.24042	5.53422	8.45186	6.20167e-17	5.93021e-16	26.6975
SNORD3B-1	1.72595	3.37164	8.44614	6.50017e-17	6.19715e-16	26.6511
FAM65B	1.66356	1.99398	8.44529	6.54535e-17	6.23096e-16	26.6443
MEF2C	1.83707	3.25229	8.44479	6.57237e-17	6.25204e-16	26.6402
ARID2	1.40576	1.94105	8.41756	8.21554e-17	7.75187e-16	26.4201
OPTN	1.35222	1.31094	8.4043	9.1561e-17	8.61399e-16	26.3132
RNF149	1.50734	6.37798	8.4042	9.16359e-17	8.61471e-16	26.3123
ISG20	1.99197	2.55522	8.40359	9.20954e-17	8.65157e-16	26.3074
PPP1R10	1.6905	2.65582	8.40189	9.33836e-17	8.75335e-16	26.2937
IKZF1	1.43029	1.79999	8.371	1.20132e-16	1.11951e-15	26.0453
ZFP36	1.23527	9.10729	8.35405	1.37893e-16	1.28131e-15	25.9093
ARID1B	1.02345	1.13996	8.32817	1.70125e-16	1.57056e-15	25.7022
SRP14	1.56867	7.70184	8.32135	1.79794e-16	1.65863e-15	25.6476
RNASET2	1.88251	6.34397	8.31376	1.91183e-16	1.7599e-15	25.5871
PAIP1	1.64615	1.91814	8.29517	2.22184e-16	2.04088e-15	25.4389
SLC2A1	1.57257	1.83801	8.27931	2.52526e-16	2.31296e-15	25.3127
ODC1	1.19586	0.979135	8.25358	3.10628e-16	2.83703e-15	25.1085
EIF1AY	1.26606	0.838434	8.25046	3.18517e-16	2.90494e-15	25.0838
RPS27A	1.15028	9.21144	8.23272	3.6729e-16	3.33316e-15	24.9433
HSH2D	1.33582	1.07123	8.20671	4.52365e-16	4.07924e-15	24.738
HIST1H1C	1.46318	1.27813	8.205	4.58586e-16	4.13243e-15	24.7245
KDM5A	1.62752	2.6189	8.15766	6.69013e-16	5.95334e-15	24.3523
ZBTB33	1.08584	0.835895	8.1482	7.21308e-16	6.40979e-15	24.2781
MED13L	1.30805	1.65252	8.1406	7.66166e-16	6.79429e-15	24.2186
BTG2	2.03317	5.58134	8.14017	7.68786e-16	6.81282e-15	24.2153
CSNK1E	1.08975	0.85243	8.13672	7.9014e-16	6.98756e-15	24.1883
PTPRE	1.64915	5.63568	8.12865	8.42399e-16	7.42922e-15	24.1252
KLF13	1.27871	1.12184	8.09426	1.10593e-15	9.66691e-15	23.857
CNPY3	1.67241	5.85025	8.08377	1.20149e-15	1.04452e-14	23.7753
NFX1	1.45594	1.93927	8.06953	1.3443e-15	1.16316e-14	23.6646
KDM5D	1.09291	0.715054	8.0632	1.41298e-15	1.22175e-14	23.6155
SULF2	1.6801	2.77733	8.05335	1.52683e-15	1.31753e-14	23.5392
BANP	1.50047	1.91455	8.01997	1.98424e-15	1.7008e-14	23.2811
RNF5	1.67686	2.70778	8.01276	2.09953e-15	1.79482e-14	23.2254
PPP2R5C	1.63864	5.0081	8.00792	2.18064e-15	1.85796e-14	23.1881
SNORD3B-2	1.61066	2.6543	7.97242	2.87724e-15	2.4353e-14	22.915
GMPPB	1.39592	1.39737	7.96109	3.14274e-15	2.65476e-14	22.8281
SFT2D2	1.60221	4.17536	7.93859	3.74349e-15	3.13744e-14	22.6558
TULP4	1.07516	1.50991	7.8686	6.43223e-15	5.32819e-14	22.1228
NCF1C	1.68252	3.64313	7.86415	6.65633e-15	5.50316e-14	22.0891
CIITA	1.69597	5.47371	7.86066	6.83773e-15	5.64222e-14	22.0626
PAG1	1.26816	1.85885	7.8434	7.80809e-15	6.41815e-14	21.932
MORF4L2	1.80431	4.14942	7.84028	7.99763e-15	6.56553e-14	21.9084
PPIB	1.44864	8.01527	7.80355	1.05972e-14	8.66078e-14	21.6314
HNRNPUL1	1.2561	2.77761	7.76119	1.46384e-14	1.18503e-13	21.3134
C16orf54	1.52146	2.61976	7.73829	1.74204e-14	1.40139e-13	21.1422
SNORD3A	2.05031	4.55238	7.73587	1.77427e-14	1.42642e-13	21.1241
TMEM19	1.37518	1.56788	7.71647	2.05539e-14	1.64726e-13	20.9794
RP11-51O6.1	1.09909	3.42612	7.71018	2.15545e-14	1.7253e-13	20.9326
RPS27	1.11642	10.5374	7.70765	2.1971e-14	1.75644e-13	20.9138
HIST1H2BC	1.14248	0.808918	7.70249	2.2845e-14	1.82518e-13	20.8754
NOP58	1.66396	3.59709	7.68803	2.54798e-14	2.03063e-13	20.768
PARK7	1.75832	6.48987	7.66483	3.03475e-14	2.40511e-13	20.5961
RP4-781K5.2	1.34134	1.28068	7.65866	3.17875e-14	2.51302e-13	20.5504
KLHDC4	1.16568	1.15278	7.65785	3.19817e-14	2.52681e-13	20.5445
NCF1B	1.7707	3.81865	7.62987	3.94573e-14	3.09267e-13	20.3378
RPL3P4	1.13373	4.13479	7.62625	4.05417e-14	3.17573e-13	20.3112
CORO1C	1.69072	5.64667	7.58868	5.36807e-14	4.16423e-13	20.0351
ARHGAP15	1.71724	2.8867	7.58568	5.48967e-14	4.25084e-13	20.013
RPS12	1.14048	9.78701	7.57948	5.74921e-14	4.44377e-13	19.9676
SND1	1.55843	4.64033	7.56389	6.45629e-14	4.97231e-13	19.8536
PPP6R1	1.32284	1.81947	7.56202	6.54641e-14	5.03869e-13	19.8399
AC090186.1	1.43644	1.92177	7.54577	7.38632e-14	5.67155e-13	19.7212
MYL12A	1.31689	8.861	7.54295	7.54225e-14	5.78089e-13	19.7007
MEF2D	1.23182	2.1023	7.54071	7.66833e-14	5.87051e-13	19.6844
RPS4X	1.02222	9.44209	7.53354	8.08728e-14	6.17648e-13	19.6321
GGA2	1.63233	2.71525	7.51559	9.23561e-14	7.01589e-13	19.5016
TM9SF2	1.50811	5.23649	7.5067	9.86298e-14	7.47918e-13	19.4369
TMEM63A	1.33638	1.69617	7.46725	1.31884e-13	9.88974e-13	19.1513
MOB1B	1.1965	1.49319	7.43907	1.62168e-13	1.2076e-12	18.9482
RMDN3	1.28338	1.36429	7.43601	1.65846e-13	1.23355e-12	18.9261
GNA15	1.55271	3.70185	7.41584	1.92199e-13	1.42708e-12	18.7812
CTSC	1.76836	6.63549	7.40204	2.12573e-13	1.57017e-12	18.6822
LDHB	1.772	5.49912	7.37595	2.57016e-13	1.88974e-12	18.4957
TSPAN3	1.69284	3.7725	7.36927	2.69813e-13	1.9759e-12	18.4479
WDFY2	1.45559	2.48235	7.35876	2.91187e-13	2.12636e-12	18.373
PHC3	1.73875	3.55126	7.33686	3.41231e-13	2.47629e-12	18.2172
NIN	1.1253	1.35085	7.3305	3.57281e-13	2.58691e-12	18.1721
AC007192.6	1.11829	0.959528	7.32399	3.74503e-13	2.70855e-12	18.1258
AGPAT5	1.10505	1.10006	7.32242	3.78764e-13	2.73628e-12	18.1147
KLHL6	1.23502	2.27036	7.30753	4.2171e-13	3.03968e-12	18.0092
IGFLR1	1.79792	4.97468	7.30481	4.30055e-13	3.09809e-12	17.99
DHRS7	1.81227	4.13975	7.30004	4.45083e-13	3.20096e-12	17.9562
SSR4	1.69753	6.65133	7.29142	4.73569e-13	3.402e-12	17.8953
TRAM1	1.56174	4.76522	7.28305	5.02939e-13	3.6029e-12	17.8362
SEC61A1	1.5669	5.20555	7.27898	5.17879e-13	3.70578e-12	17.8075
DDX17	1.26683	5.16215	7.25582	6.11411e-13	4.34597e-12	17.6444
SCRN1	1.04259	0.938319	7.25108	6.32516e-13	4.49349e-12	17.6111
CD37	1.41724	6.5937	7.24863	6.4369e-13	4.57034e-12	17.5939
LPXN	1.72454	4.7334	7.23159	7.27054e-13	5.14799e-12	17.4743
MNAT1	1.06372	0.90055	7.2007	9.06061e-13	6.36625e-12	17.2582
RAC2	1.70706	5.93945	7.19894	9.17456e-13	6.43575e-12	17.246
PCED1B-AS1	1.6324	2.37993	7.18703	9.98509e-13	6.9852e-12	17.1629
FAM65A	1.6657	4.42073	7.18426	1.01832e-12	7.11216e-12	17.1436
HINT1	1.62557	5.62404	7.15953	1.21335e-12	8.41471e-12	16.9716
XBP1	1.64861	2.89782	7.14278	1.36583e-12	9.41111e-12	16.8554
RPS28	1.01173	9.88163	7.13538	1.43908e-12	9.89983e-12	16.8041
C12orf57	1.39344	1.62498	7.12704	1.52619e-12	1.0471e-11	16.7464
NFKBID	1.78	4.14324	7.11903	1.61477e-12	1.10433e-11	16.6911
KDM6B	1.32037	2.88966	7.11625	1.64659e-12	1.12489e-11	16.6719
ACTN4	1.49512	2.95013	7.10148	1.82677e-12	1.24666e-11	16.57
RPL6	1.01346	9.48585	7.07644	2.17734e-12	1.47882e-11	16.3978
RAP1GDS1	1.48809	3.35169	7.06131	2.42042e-12	1.63611e-11	16.294
RPL23A	1.12707	9.89047	7.04533	2.70594e-12	1.82334e-11	16.1846
TMEM39A	1.37066	2.082	7.00024	3.70218e-12	2.47384e-11	15.8771
SLC33A1	1.14197	1.23001	6.99324	3.88619e-12	2.59545e-11	15.8296
SMIM14	1.57813	2.61822	6.98875	4.00897e-12	2.67189e-11	15.799
SLC35C2	1.4283	2.25157	6.94004	5.61027e-12	3.69115e-11	15.4695
RP11-645C24.2	1.3043	2.90461	6.93434	5.83488e-12	3.83499e-11	15.4311
PAN3	1.33221	3.68139	6.9264	6.16187e-12	4.04576e-11	15.3776
ZMYM2	1.28351	2.03331	6.92241	6.3327e-12	4.15367e-11	15.3508
TUBG1	1.29496	1.71598	6.90473	7.14854e-12	4.66255e-11	15.232
UCK2	1.23443	1.41137	6.87626	8.68394e-12	5.59685e-11	15.0413
TRA2A	1.09209	5.91537	6.84806	1.05224e-11	6.73967e-11	14.8531
POLR3E	1.36005	1.90869	6.83678	1.136e-11	7.2436e-11	14.7781
GTPBP1	1.32189	2.38631	6.83621	1.14036e-11	7.26778e-11	14.7743
TBC1D8	1.02496	1.14383	6.82702	1.21366e-11	7.712e-11	14.7133
SNORD3C	1.30881	2.8936	6.8248	1.23211e-11	7.82145e-11	14.6985
ENPP2	1.28827	1.75924	6.81053	1.35698e-11	8.57171e-11	14.6039
TGFBR1	1.00203	1.28902	6.79979	1.45917e-11	9.19909e-11	14.5328
CBLB	1.04284	1.29432	6.77878	1.68125e-11	1.05525e-10	14.394
AKAP9	1.499	3.88063	6.77532	1.72083e-11	1.07903e-10	14.3712
MICAL1	1.4086	3.21083	6.76929	1.79204e-11	1.12314e-10	14.3315
IL16	1.43927	2.46725	6.76085	1.89663e-11	1.18752e-10	14.276
RPPH1	1.08558	0.845248	6.74107	2.16577e-11	1.35011e-10	14.146
SRSF3	1.0725	6.59472	6.70138	2.82341e-11	1.74648e-10	13.8864
CCDC57	1.15146	1.43736	6.69648	2.91711e-11	1.80097e-10	13.8544
THEMIS2	1.36078	6.61363	6.66492	3.59775e-11	2.21266e-10	13.6491
SUMF2	1.31678	3.82411	6.65898	3.74226e-11	2.30043e-10	13.6106
C15orf39	1.09438	2.00291	6.64374	4.13931e-11	2.53599e-10	13.5119
CD38	1.46221	2.19343	6.63612	4.35305e-11	2.66186e-10	13.4626
IDS	1.2203	3.40614	6.61181	5.10981e-11	3.11126e-10	13.3057
SP110	1.50749	4.25138	6.60822	5.23216e-11	3.18273e-10	13.2826
HDAC9	1.14293	1.55375	6.59946	5.54221e-11	3.36655e-10	13.2263
IL2RG	1.65202	4.53109	6.59084	5.86498e-11	3.55251e-10	13.1709
ZNF22	1.02888	1.22474	6.54902	7.71121e-11	4.63359e-10	12.9032
KPNA2	1.46588	2.76379	6.52976	8.74276e-11	5.22894e-10	12.7804
GCC2	1.34157	2.1947	6.51785	9.44653e-11	5.64196e-10	12.7046
SMARCB1	1.22667	2.68313	6.51658	9.52486e-11	5.68345e-10	12.6966
AKNA	1.08686	2.10518	6.51274	9.76575e-11	5.81096e-10	12.6721
HIST2H2AA4	1.72727	5.1663	6.47114	1.2784e-10	7.5197e-10	12.4088
COMMD6	1.53038	4.71498	6.45167	1.44935e-10	8.50186e-10	12.2861
PSD4	1.05689	1.54822	6.42796	1.68791e-10	9.83821e-10	12.1372
CLASP2	1.22257	2.23572	6.41652	1.81641e-10	1.05632e-09	12.0655
TMX3	1.27891	2.41156	6.39088	2.13997e-10	1.23663e-09	11.9053
FAM60A	1.25197	1.89167	6.38862	2.17111e-10	1.25349e-09	11.8912
ANKRD12	1.39259	4.30466	6.34535	2.85895e-10	1.63443e-09	11.6223
FNBP4	1.33685	3.18788	6.32104	3.3345e-10	1.8928e-09	11.472
ATRX	1.23999	2.90405	6.27391	4.48675e-10	2.51238e-09	11.1822
TMED4	1.19594	3.98908	6.18055	8.02985e-10	4.39653e-09	10.6142
ATF7IP	1.36888	3.11661	6.173	8.41381e-10	4.59303e-09	10.5686
SEC16A	1.08804	2.15147	6.16626	8.77195e-10	4.77837e-09	10.5279
IL6ST	1.20719	2.04619	6.16609	8.78109e-10	4.78131e-09	10.5269
RP11-16E23.4	1.46674	3.07267	6.15638	9.32346e-10	5.05944e-09	10.4685
PMAIP1	1.25312	1.86526	6.15455	9.42928e-10	5.11255e-09	10.4575
RP1-257A7.5	1.65493	4.53463	6.14272	1.01423e-09	5.47701e-09	10.3864
RPS5	1.15795	9.13316	6.12665	1.11959e-09	6.01695e-09	10.29
RFTN1	1.08405	1.82097	6.12048	1.1628e-09	6.23613e-09	10.253
CYTH4	1.3111	4.42783	6.08943	1.4063e-09	7.49814e-09	10.0676
CTB-63M22.1	1.38771	4.22923	6.08897	1.41028e-09	7.51619e-09	10.0649
RPS15A	1.04751	9.31138	6.08841	1.41512e-09	7.53573e-09	10.0616
DFFA	1.03957	1.41947	6.08716	1.42591e-09	7.59006e-09	10.0542
SNORD118	1.2756	1.3238	6.07015	1.58178e-09	8.38145e-09	9.95302
SUB1	1.3726	6.54264	6.06996	1.58366e-09	8.38795e-09	9.95186
FOXP1	1.11412	2.80669	6.03734	1.93072e-09	1.01549e-08	9.75873
STAT2	1.24388	4.53208	6.02884	2.03274e-09	1.06653e-08	9.70855
UVRAG	1.20672	2.48736	5.99524	2.48992e-09	1.29737e-08	9.51089
MIA3	1.20717	2.17145	5.97917	2.74274e-09	1.42216e-08	9.41669
EEF1B2	1.23113	7.99469	5.97891	2.74693e-09	1.42376e-08	9.4152
OXR1	1.07272	1.55253	5.96151	3.04933e-09	1.57287e-08	9.31348
PPP1R15A	1.07682	8.31265	5.94086	3.45014e-09	1.77391e-08	9.19321
GAK	1.2872	3.20815	5.93768	3.51639e-09	1.80724e-08	9.17469
SPG20	1.18214	2.1186	5.92752	3.73606e-09	1.9163e-08	9.11569
PNISR	1.3451	3.84163	5.9221	3.85876e-09	1.97529e-08	9.08423
PCBP1-AS1	1.11355	1.5555	5.9167	3.98467e-09	2.03648e-08	9.05297
C5orf45	1.05198	2.14805	5.91388	4.0521e-09	2.0693e-08	9.03663
CD164	1.24522	5.92598	5.90536	4.26265e-09	2.17336e-08	8.98732
RGS2	1.69112	7.74094	5.90255	4.33438e-09	2.20817e-08	8.97107
UTRN	1.30346	3.21089	5.89	4.66957e-09	2.37328e-08	8.89856
CIRBP	1.21554	5.16368	5.87723	5.03626e-09	2.55156e-08	8.82499
CDK2AP2	1.36541	3.70895	5.86887	5.29125e-09	2.67441e-08	8.77692
ADD3	1.02168	1.33892	5.86416	5.44054e-09	2.7477e-08	8.74984
CD99	1.14847	4.86172	5.84829	5.9741e-09	3.00298e-08	8.65881
FIP1L1	1.16809	2.22163	5.83478	6.46846e-09	3.23499e-08	8.58146
CTBP1	1.0086	3.21858	5.82256	6.94927e-09	3.46464e-08	8.51171
PCM1	1.24171	2.83283	5.81863	7.11139e-09	3.54134e-08	8.48927
IFIT2	1.22689	1.74731	5.81815	7.13147e-09	3.54995e-08	8.48653
PCNXL4	1.11473	1.99915	5.8141	7.30244e-09	3.62943e-08	8.46349
RPSA	1.03304	8.92975	5.78793	8.50961e-09	4.20334e-08	8.31469
TMED2	1.21113	5.35642	5.75747	1.016e-08	4.9764e-08	8.14233
RP11-147L13.2	1.01513	1.53291	5.73702	1.14386e-08	5.56861e-08	8.02711
TSPYL1	1.14031	3.40783	5.73223	1.17597e-08	5.70975e-08	8.0002
IFRD1	1.36202	4.33371	5.70706	1.35979e-08	6.56003e-08	7.85905
ARHGEF7	1.03056	2.05073	5.69747	1.43698e-08	6.91164e-08	7.8054
DDX18	1.00952	2.79948	5.68557	1.53861e-08	7.38109e-08	7.739
CXorf40A	1.08587	1.71461	5.67391	1.64508e-08	7.87712e-08	7.674
SRSF7	1.33006	5.5166	5.62258	2.20479e-08	1.03865e-07	7.38959
AMZ2	1.18793	2.11738	5.61389	2.3163e-08	1.08918e-07	7.34169
TTC3	1.16454	2.83368	5.6129	2.32932e-08	1.0945e-07	7.33625
SEC11C	1.37507	3.07194	5.60764	2.39979e-08	1.12678e-07	7.30731
MAPK1IP1L	1.14407	5.35209	5.6066	2.41409e-08	1.13263e-07	7.30155
SRPR	1.18332	3.56244	5.59509	2.57651e-08	1.2044e-07	7.23834
FKBP2	1.33164	4.19877	5.59451	2.58507e-08	1.20759e-07	7.23511
TMEM109	1.33065	4.53466	5.59188	2.6237e-08	1.22519e-07	7.22072
SSR1	1.17827	5.21731	5.57012	2.96663e-08	1.3813e-07	7.10149
ANKRD10	1.05957	6.50862	5.56775	3.00656e-08	1.39789e-07	7.08852
SPCS3	1.14798	4.61667	5.56302	3.08757e-08	1.43345e-07	7.06272
CCS	1.22215	2.19923	5.52656	3.78834e-08	1.74364e-07	6.86427
CXorf40B	1.14894	2.27362	5.52514	3.8186e-08	1.75631e-07	6.85655
CAT	1.26857	3.95252	5.47117	5.15724e-08	2.3401e-07	6.56513
PIP5K1A	1.10129	2.10408	5.40067	7.60553e-08	3.39929e-07	6.18866
PEBP1	1.20087	4.04629	5.38649	8.21889e-08	3.66322e-07	6.11353
SEC61G	1.31827	4.6443	5.38603	8.23951e-08	3.67114e-07	6.1111
RP11-543P15.1	1.01142	2.35051	5.35372	9.82597e-08	4.34028e-07	5.94058
IDI1	1.19148	2.68348	5.33963	1.0607e-07	4.66279e-07	5.86653
TACC1	1.03439	2.8097	5.33765	1.07213e-07	4.70818e-07	5.85616
SIVA1	1.3308	3.64328	5.32584	1.14298e-07	5.0005e-07	5.79421
NAPA	1.0294	5.46238	5.31738	1.19645e-07	5.22726e-07	5.74996
BRD2	1.01935	4.76074	5.29635	1.34009e-07	5.82114e-07	5.64024
ANAPC16	1.20093	3.5725	5.26542	1.58207e-07	6.83061e-07	5.47965
SRC	1.04982	2.2858	5.25129	1.70624e-07	7.32967e-07	5.40658
LUC7L3	1.32236	3.89631	5.19999	2.24134e-07	9.48849e-07	5.14286
GRSF1	1.13398	3.30153	5.18848	2.38206e-07	1.00544e-06	5.08401
ELP2	1.1096	2.25177	5.13896	3.09082e-07	1.28639e-06	4.83237
PHYKPL	1.12459	3.17193	5.12237	3.37085e-07	1.39704e-06	4.74862
HSPA5	1.11547	6.12671	5.11839	3.44172e-07	1.42503e-06	4.72854
RNF138	1.10261	2.30868	5.11764	3.45511e-07	1.42965e-06	4.72478
ANTXR2	1.00947	2.04912	5.11664	3.47318e-07	1.4362e-06	4.71975
RNASEH2B	1.01952	2.07876	5.1061	3.66936e-07	1.51245e-06	4.6667
CLK1	1.18286	6.33117	5.09343	3.91929e-07	1.60771e-06	4.6031
NPM1	1.05172	8.1106	5.08216	4.15545e-07	1.69752e-06	4.54662
C17orf76-AS1	1.05691	7.13767	5.07077	4.4078e-07	1.79375e-06	4.48973
NR4A1	1.22448	5.47141	5.06753	4.48225e-07	1.82174e-06	4.47357
ELMO2	1.00381	1.77541	5.0432	5.08188e-07	2.05438e-06	4.35244
STT3A	1.06902	4.36291	4.99934	6.36385e-07	2.5398e-06	4.13552
NCF1	1.24759	4.7846	4.97045	7.37303e-07	2.91714e-06	3.99365
SIRPB1	1.1526	3.44765	4.96247	7.67803e-07	3.035e-06	3.95459
EIF4A2	1.10849	6.32648	4.92602	9.2323e-07	3.62147e-06	3.77701
PPP1R2	1.15737	4.23608	4.89356	1.08684e-06	4.22191e-06	3.61993
PLEKHG2	1.03045	2.59081	4.87039	1.22031e-06	4.71044e-06	3.50844
ARHGAP9	1.18291	3.95834	4.85493	1.31804e-06	5.06934e-06	3.43432
OAS1	1.22208	3.34218	4.85392	1.32469e-06	5.09128e-06	3.42947
RBBP4	1.06996	4.42691	4.76475	2.05651e-06	7.69497e-06	3.00661
MAD2L2	1.03598	2.31354	4.72294	2.52126e-06	9.28493e-06	2.81092
ARHGAP27	1.0337	3.0169	4.67517	3.1758e-06	1.15331e-05	2.58941
TOR3A	1.00269	2.5967	4.66311	3.36507e-06	1.21653e-05	2.53387
TAP1	1.11469	5.04894	4.62514	4.03496e-06	1.43963e-05	2.35978
ILF2	1.08462	4.26941	4.49801	7.33764e-06	2.5131e-05	1.78712
SAP30BP	1.11732	3.36577	4.47878	8.02169e-06	2.72555e-05	1.70188
CD83	1.08656	5.99876	4.4116	1.09238e-05	3.62985e-05	1.40679
AL162151.3	1.03381	2.16514	4.40541	1.12369e-05	3.72712e-05	1.3798
RAB4B	1.0305	3.11606	4.39874	1.15839e-05	3.83231e-05	1.35076
STAT1	1.02469	5.31088	4.36188	1.36922e-05	4.48584e-05	1.19117
APEX1	1.02052	4.6512	4.29773	1.82622e-05	5.87644e-05	0.916556
ERCC1	1.02218	3.90231	4.10251	4.28589e-05	0.000129801	0.10532
SNHG5	1.02408	5.36574	3.94331	8.37248e-05	0.000241205	-0.528902

## Sheet: MoDC
	logFC	AveExpr	t	P.Value	adj.P.Val	B
CST7	3.92057	0.886324	27.179	9.09726e-135	2.91635e-131	296.566
CD1C	4.48734	1.33139	22.9703	1.47823e-101	3.15922e-98	220.627
HLA-DOB	2.62122	0.563416	21.1434	5.16361e-88	7.35699e-85	189.662
ASB2	2.28297	0.460593	20.7459	3.7701e-85	4.02867e-82	183.115
ITGAX	3.18266	5.29822	20.7382	4.28281e-85	4.22449e-82	182.989
IDO1	3.97863	1.15793	20.3677	1.86773e-82	1.49687e-79	176.955
NAPSB	4.59056	4.62489	20.2552	1.16748e-81	8.80626e-79	175.135
COTL1	3.6577	6.91487	18.8379	7.29667e-72	4.45548e-69	152.744
GIPR	1.38323	0.24526	18.024	1.91455e-66	9.09268e-64	140.36
AGPAT9	3.09794	1.16557	17.9311	7.78059e-66	3.56323e-63	138.969
NDRG2	3.17385	1.45561	17.6477	5.41738e-64	2.39542e-61	134.758
LYZ	3.17617	8.85103	17.0319	4.67816e-60	1.9996e-57	125.765
CLEC10A	4.09486	2.22862	16.8687	4.98052e-59	2.06017e-56	123.419
ACTB	1.20425	12.6727	15.5113	9.20295e-51	2.95024e-48	104.539
FGL2	3.10853	4.67656	15.3986	4.24162e-50	1.32659e-47	103.024
LGALS2	3.76212	2.32308	15.2194	4.73659e-49	1.44613e-46	100.632
CFP	3.84168	3.48433	14.3875	2.6222e-44	7.30965e-42	89.8062
CLNK	1.00446	0.162152	14.1603	4.77139e-43	1.24864e-40	86.9313
HLA-DQA2	2.93964	4.1661	13.7623	7.04414e-41	1.67272e-38	81.9828
CNN2	3.25088	4.89608	13.6221	3.98704e-40	8.96943e-38	80.2657
PPA1	3.71716	4.64578	13.6173	4.22934e-40	9.3505e-38	80.2073
HLA-DQA1	3.51848	7.11366	13.5889	5.99708e-40	1.3034e-37	79.8614
ATP1B1	1.96088	1.37323	13.4456	3.46487e-39	7.16614e-37	78.1242
RP11-1143G9.4	2.69375	9.13624	13.2056	6.31794e-38	1.26586e-35	75.249
TLR10	1.52528	0.534438	13.0075	6.73027e-37	1.28809e-34	72.9066
HLA-DPB2	1.84334	1.84071	12.8897	2.70889e-36	5.04989e-34	71.528
HDAC9	2.33923	1.55375	12.8345	5.18692e-36	9.5017e-34	70.8849
HLA-DPB1	2.44032	9.97859	12.7838	9.39129e-36	1.69612e-33	70.2973
HLA-DRB6	1.55934	6.38525	12.6184	6.4444e-35	1.14773e-32	68.3909
HLA-DRB5	1.79675	8.4282	12.5886	9.09842e-35	1.57661e-32	68.0496
LSP1	2.55291	6.27201	12.475	3.36652e-34	5.53447e-32	66.7548
HLA-DQB2	2.25853	4.68354	12.4698	3.57092e-34	5.7962e-32	66.6964
CPVL	3.21302	5.21048	12.2903	2.76747e-33	4.38114e-31	64.6702
PDLIM1	1.54711	0.523319	12.235	5.1712e-33	7.98919e-31	64.0517
AC011558.5	2.62401	3.32534	12.1446	1.43002e-32	2.13222e-30	63.0454
HLA-DQB1	2.40396	8.35609	12.0385	4.68831e-32	6.75485e-30	61.8708
DUSP4	1.60366	0.743283	12.0259	5.39036e-32	7.68007e-30	61.7328
HLA-DRB1	1.56196	10.2065	11.8782	2.76949e-31	3.778e-29	60.114
CYP2S1	2.3618	1.97892	11.7882	7.44377e-31	9.84035e-29	59.1362
TMSB4X	1.00037	12.7516	11.7553	1.06656e-30	1.39556e-28	58.7806
HLA-DPA1	2.22542	11.1296	11.7114	1.72181e-30	2.23017e-28	58.307
INSIG1	3.04145	3.49495	11.6495	3.37249e-30	4.32454e-28	57.6423
CD5	1.11133	0.329946	11.3519	8.21174e-29	9.48641e-27	54.4862
AIM1	1.87592	1.70698	11.3245	1.09882e-28	1.24692e-26	54.1984
PAK1	2.65907	3.77932	11.2778	1.80001e-28	2.00709e-26	53.7106
MAP4K1	2.13553	1.93057	11.1562	6.45419e-28	6.83984e-26	52.4487
IFI30	1.86447	10.4445	11.1007	1.15165e-27	1.21046e-25	51.8765
IFITM1	2.78922	2.17288	11.0359	2.25786e-27	2.33488e-25	51.2114
CLIC2	2.01656	1.41065	10.9559	5.15945e-27	5.25076e-25	50.3949
ITGB2-AS1	1.93871	2.08576	10.9116	8.13324e-27	8.0225e-25	49.9453
IL1R2	1.81179	0.787666	10.8954	9.6076e-27	9.26303e-25	49.7808
HLA-DRA	1.54949	12.4467	10.8849	1.06935e-26	1.0233e-24	49.675
LAMP3	1.21972	0.420441	10.8682	1.26908e-26	1.20543e-24	49.5059
CST3	1.76056	9.80139	10.7066	6.55479e-26	6.09073e-24	47.8843
TMSB4XP8	1.14352	5.66629	10.6717	9.32726e-26	8.60457e-24	47.5359
TUBA1A	2.89127	5.74626	10.6464	1.20232e-25	1.07065e-23	47.2852
ENTPD1	2.29116	2.67788	10.5963	1.98672e-25	1.74492e-23	46.7893
C1orf162	2.60782	6.06972	10.5918	2.07949e-25	1.81396e-23	46.7443
HLA-DOA	2.52399	3.00371	10.5693	2.60407e-25	2.24107e-23	46.5222
AHR	1.9741	2.26506	10.5066	4.86179e-25	4.15618e-23	45.9058
SYTL1	1.18149	0.452086	10.4748	6.66887e-25	5.55292e-23	45.5938
CD74	1.05567	13.514	10.4054	1.3233e-24	1.07397e-22	44.9174
C10orf128	2.12374	1.7884	10.3373	2.58429e-24	2.08417e-22	44.2568
CD200R1	1.20753	0.470254	10.2704	4.96874e-24	3.98213e-22	43.6116
FGR	2.27238	5.12804	10.0519	4.09456e-23	3.12527e-21	41.5307
DUSP2	2.94376	4.04082	10.0115	6.02521e-23	4.54478e-21	41.1497
LIMD2	2.24052	4.0042	9.97332	8.66239e-23	6.42069e-21	40.7916
AXL	2.39482	2.34495	9.96845	9.07218e-23	6.68578e-21	40.746
NET1	1.51123	0.885254	9.94279	1.15726e-22	8.38393e-21	40.5059
NAV1	1.40039	1.14676	9.93053	1.29966e-22	9.36269e-21	40.3915
TES	2.17072	2.79585	9.9271	1.3426e-22	9.61798e-21	40.3594
RUNX3	1.26288	0.991233	9.853	2.70033e-22	1.89215e-20	39.6704
CD48	2.65745	4.30112	9.85231	2.7179e-22	1.89411e-20	39.664
STK17B	1.86878	5.33086	9.80357	4.29331e-22	2.97584e-20	39.2131
ICAM3	2.00486	1.69577	9.77591	5.55992e-22	3.83305e-20	38.9583
BIRC3	2.44011	2.80068	9.72178	9.20465e-22	6.24504e-20	38.4613
ADAM19	1.8373	2.93533	9.69301	1.20215e-21	8.07079e-20	38.1981
SLC38A1	1.41112	1.43599	9.56129	4.04528e-21	2.66014e-19	37.0021
SP140	1.66834	1.18446	9.5561	4.24185e-21	2.77517e-19	36.9553
GPR35	1.49473	0.9126	9.45692	1.04711e-20	6.68016e-19	36.0649
ABI3	2.097	2.86638	9.39269	1.87176e-20	1.16513e-18	35.4927
ITGB7	1.52616	0.911264	9.37405	2.21386e-20	1.36482e-18	35.3273
TIMP1	2.30789	7.1598	9.30674	4.04952e-20	2.43788e-18	34.7325
LY75	1.41227	1.31126	9.16831	1.38533e-19	8.1862e-18	33.5213
RHOF	1.67635	1.99007	9.14334	1.72631e-19	1.0108e-17	33.3046
RPS4Y1	2.22424	2.31071	9.01054	5.51654e-19	3.08902e-17	32.161
CHN2	1.51066	1.19609	8.96916	7.89871e-19	4.347e-17	31.8077
IFITM2	2.30678	7.30437	8.94538	9.70218e-19	5.31671e-17	31.6053
ARF6	1.42585	3.25721	8.85164	2.17181e-18	1.18507e-16	30.8125
IFITM3	2.25731	6.11276	8.85073	2.18883e-18	1.1893e-16	30.8048
CD1D	1.85637	2.02122	8.73201	6.00704e-18	3.14401e-16	29.8117
HCK	1.81725	5.86378	8.72193	6.54132e-18	3.40973e-16	29.7279
BTLA	1.03881	0.506953	8.69876	7.95334e-18	4.12898e-16	29.5357
RIN3	1.61446	2.9487	8.67126	1.00239e-17	5.18294e-16	29.3082
MAFF	1.57473	1.56495	8.65889	1.11201e-17	5.72663e-16	29.2061
DAPP1	1.89885	2.39654	8.6498	1.20016e-17	6.15586e-16	29.1311
NABP1	2.04438	4.063	8.56841	2.36763e-17	1.18594e-15	28.4631
ISG20	2.13101	2.55522	8.54253	2.93496e-17	1.46439e-15	28.252
WARS	2.12759	7.45022	8.50073	4.14738e-17	2.05335e-15	27.9121
ASAP1	1.57708	2.48083	8.49062	4.50799e-17	2.22331e-15	27.8301
ITGA4	1.93186	3.03738	8.39902	9.55939e-17	4.67863e-15	27.0915
ACTG1	1.3316	9.80828	8.39302	1.00392e-16	4.87622e-15	27.0434
MAT2A	2.10801	5.44368	8.37847	1.13045e-16	5.44955e-15	26.9267
ACTR3	1.83616	6.76351	8.36605	1.25073e-16	6.00677e-15	26.8274
RNH1	1.9192	6.43116	8.35907	1.32382e-16	6.31055e-15	26.7716
SPECC1	1.6232	1.77764	8.34794	1.44912e-16	6.85684e-15	26.6828
OXSR1	1.38575	1.45246	8.31476	1.89641e-16	8.90758e-15	26.4185
ITGB2	1.32143	8.17154	8.2519	3.1487e-16	1.46289e-14	25.9205
AREG	2.3267	3.07592	8.24266	3.39134e-16	1.56993e-14	25.8476
CD226	1.06003	0.600877	8.21823	4.12515e-16	1.89594e-14	25.6552
SERPINB9	1.88836	5.72501	8.13466	8.03151e-16	3.61362e-14	25.0011
ATG3	1.95887	5.38634	8.12615	8.59234e-16	3.85243e-14	24.9348
CIITA	1.84482	5.47371	8.12484	8.68203e-16	3.87908e-14	24.9246
PRCP	1.94332	3.63083	8.11809	9.1596e-16	4.07825e-14	24.8721
FLNA	1.60728	5.73267	8.03162	1.811e-15	7.89879e-14	24.203
TTYH2	1.40982	1.37322	7.9752	2.81569e-15	1.2116e-13	23.77
KCNK6	1.1612	0.936868	7.96507	3.04683e-15	1.30232e-13	23.6926
GBP4	1.58461	1.86352	7.95314	3.34325e-15	1.41955e-13	23.6015
TNFRSF10B	1.65242	2.21174	7.91599	4.46071e-15	1.86927e-13	23.3186
SERPINB1	1.81017	5.36538	7.88958	5.4715e-15	2.27575e-13	23.1182
LCP1	1.20206	8.06485	7.8144	9.75261e-15	3.99545e-13	22.5514
AKAP2	1.38502	1.43952	7.79152	1.1617e-14	4.6992e-13	22.3799
HLA-DQB1-AS1	1.18427	1.75568	7.76209	1.45387e-14	5.84417e-13	22.1599
PTP4A2	1.94846	4.04811	7.73727	1.75564e-14	7.01327e-13	21.975
RPL8	1.09302	10.2989	7.72958	1.86107e-14	7.41135e-13	21.9179
GSTP1	1.72606	8.14157	7.72362	1.94696e-14	7.72936e-13	21.8737
FAM110A	1.14943	0.896366	7.70047	2.31969e-14	9.12437e-13	21.702
FOXN2	1.41514	1.85749	7.66108	3.12144e-14	1.21292e-12	21.411
LST1	1.847	6.42896	7.65039	3.38266e-14	1.31045e-12	21.3323
RGS10	1.82009	4.95683	7.59092	5.27906e-14	2.0207e-12	20.8962
CAPN2	1.6266	2.98056	7.56729	6.29514e-14	2.40246e-12	20.7237
FNIP2	1.18332	1.45889	7.4881	1.1313e-13	4.22936e-12	20.1496
MSN	1.28023	5.81661	7.46547	1.33619e-13	4.96635e-12	19.9866
GLIPR2	1.74964	4.42378	7.40509	2.07895e-13	7.68254e-12	19.5538
LINC00152	1.70446	2.78989	7.36674	2.74814e-13	9.95464e-12	19.2807
MARCKSL1	1.10115	0.901318	7.35235	3.05038e-13	1.10183e-11	19.1786
TCTN3	1.33482	1.36292	7.35178	3.06291e-13	1.10325e-11	19.1746
DENND1B	1.11295	1.0061	7.31477	4.00278e-13	1.42974e-11	18.9127
DUSP1	1.82213	9.08288	7.31156	4.09642e-13	1.45912e-11	18.8901
SLC8A1-AS1	1.15468	1.27935	7.23737	6.97679e-13	2.4377e-11	18.3691
NUBPL	1.01602	0.709534	7.21649	8.0977e-13	2.78383e-11	18.2234
CCND2	1.21315	1.48347	7.19703	9.30049e-13	3.1634e-11	18.088
CERKL	1.18666	1.92449	7.17094	1.11921e-12	3.75697e-11	17.9069
MIR4435-1HG	1.54339	2.1573	7.15479	1.25471e-12	4.17901e-11	17.7952
RUFY3	1.16249	1.10685	7.13982	1.39468e-12	4.62119e-11	17.6918
HLA-DMA	1.47518	8.36553	7.10957	1.72581e-12	5.61678e-11	17.4835
MBOAT7	1.47091	2.49538	7.08873	1.9977e-12	6.45252e-11	17.3405
APOBR	1.09229	1.32352	7.06739	2.31973e-12	7.43649e-11	17.1944
MNDA	1.69644	4.95691	7.05054	2.60938e-12	8.30273e-11	17.0795
ACAA1	1.86958	4.50664	7.03924	2.82339e-12	8.93934e-11	17.0024
MYADM	1.52901	5.76504	6.99646	3.80057e-12	1.18132e-10	16.712
GDI2	1.54262	6.3171	6.98888	4.00533e-12	1.24059e-10	16.6608
CD52	2.18895	4.71934	6.98849	4.01629e-12	1.24098e-10	16.6581
ADAM8	1.57286	2.94398	6.96462	4.73666e-12	1.4496e-10	16.4969
CSRNP1	1.4639	3.30778	6.96035	4.8782e-12	1.48936e-10	16.4682
GPR137B	1.07783	1.34085	6.94564	5.39824e-12	1.64422e-10	16.3692
RPL18AP3	1.018	5.62411	6.93673	5.73953e-12	1.74403e-10	16.3094
S100B	1.0469	0.666306	6.92644	6.15995e-12	1.86735e-10	16.2403
CD72	1.52463	1.9017	6.8938	7.70378e-12	2.31891e-10	16.0219
APOL3	1.44768	1.86669	6.88501	8.18039e-12	2.45661e-10	15.9633
P2RY14	1.08764	1.30781	6.85735	9.87776e-12	2.932e-10	15.7793
NDEL1	1.63465	3.10592	6.85528	1.00182e-11	2.96681e-10	15.7655
S100A10	1.61623	8.66592	6.8411	1.10318e-11	3.24031e-10	15.6714
HLA-DMB	1.78803	7.24216	6.82393	1.23938e-11	3.62017e-10	15.5578
GSN	1.6777	6.3058	6.79943	1.46268e-11	4.21481e-10	15.3961
CORO1A	1.54763	7.51134	6.78713	1.58927e-11	4.56933e-10	15.3151
PON2	1.48002	2.21148	6.78476	1.61488e-11	4.62225e-10	15.2995
SLAMF7	1.67055	3.6293	6.76592	1.83319e-11	5.21219e-10	15.1758
ETV6	1.23514	3.29203	6.72823	2.36013e-11	6.65143e-10	14.9293
TRMT6	1.06695	1.06152	6.72345	2.43671e-11	6.83719e-10	14.8981
CIB1	1.5632	4.7079	6.6705	3.46698e-11	9.62276e-10	14.5542
SUSD3	1.0147	0.751028	6.66175	3.67404e-11	1.01754e-09	14.4976
CUL1	1.28668	2.12642	6.62872	4.57087e-11	1.25777e-09	14.2847
STK4	1.45913	3.45501	6.62501	4.68428e-11	1.28347e-09	14.2608
CSF2RA	1.39077	4.36425	6.62269	4.75654e-11	1.30049e-09	14.2459
EIF5A	1.12379	6.77334	6.58513	6.08887e-11	1.65419e-09	14.0052
ARL5B	1.02688	1.30687	6.56206	7.08192e-11	1.9078e-09	13.8579
LRMP	1.30809	1.53559	6.55827	7.25948e-11	1.94339e-09	13.8338
STK38L	1.4234	2.0485	6.5568	7.32951e-11	1.95805e-09	13.8244
ANXA5	1.2324	7.74444	6.55067	7.62885e-11	2.02117e-09	13.7854
REL	1.27598	3.43216	6.54782	7.77203e-11	2.05486e-09	13.7673
DOCK5	1.06595	3.08222	6.54146	8.10109e-11	2.13306e-09	13.7269
SAMHD1	1.27759	6.0724	6.51331	9.72975e-11	2.53072e-09	13.5484
RAB7A	1.20758	6.78166	6.50923	9.99074e-11	2.58289e-09	13.5226
CHD1	1.36645	2.97543	6.50655	1.01661e-10	2.62293e-09	13.5057
SCIMP	1.4207	3.32729	6.50384	1.03461e-10	2.65869e-09	13.4886
IL2RG	1.71115	4.53109	6.48684	1.15506e-10	2.95046e-09	13.3813
CAMK2D	1.20394	1.85612	6.44093	1.55302e-10	3.91244e-09	13.093
EDEM1	1.1908	3.52607	6.44015	1.56086e-10	3.9245e-09	13.0881
ANXA6	1.4734	2.61778	6.4303	1.66274e-10	4.17246e-09	13.0265
ATP2B1	1.42451	2.98157	6.42287	1.74393e-10	4.36767e-09	12.9801
JAK3	1.29347	2.61513	6.39353	2.10401e-10	5.1884e-09	12.7974
PRELID1	1.55491	6.40065	6.37642	2.34658e-10	5.74241e-09	12.6912
MOB3A	1.39993	3.39435	6.36935	2.45459e-10	5.97253e-09	12.6474
PPT1	1.48653	6.12191	6.36497	2.52394e-10	6.12965e-09	12.6202
ELOVL5	1.4758	3.43233	6.32773	3.19638e-10	7.67551e-09	12.3904
LY86	1.57298	3.86767	6.30082	3.78822e-10	9.06275e-09	12.2251
GPR132	1.25475	1.79554	6.28153	4.27728e-10	1.01947e-08	12.107
PPIF	1.47694	3.72596	6.27496	4.4573e-10	1.05844e-08	12.0669
RHOC	1.63504	3.88533	6.25281	5.12125e-10	1.20495e-08	11.9319
CAP1	1.13443	6.82982	6.24974	5.22043e-10	1.22604e-08	11.9132
ZNF516	1.00046	1.21019	6.23813	5.61323e-10	1.31347e-08	11.8427
HMGN1	1.46288	5.31905	6.23026	5.89565e-10	1.37454e-08	11.795
RGS18	1.23434	1.60211	6.20972	6.70034e-10	1.55087e-08	11.6706
C20orf27	1.26575	2.83279	6.18737	7.69766e-10	1.76894e-08	11.5357
CKLF	1.57587	4.11626	6.18311	7.90325e-10	1.81294e-08	11.5101
TPM3	1.05154	8.44622	6.17705	8.20564e-10	1.8756e-08	11.4736
ACAP1	1.24481	1.73371	6.16891	8.62895e-10	1.96186e-08	11.4247
DCXR	1.62711	3.72971	6.1627	8.96675e-10	2.03146e-08	11.3874
CD86	1.4547	4.69666	6.12782	1.11159e-09	2.50069e-08	11.1786
SLC8A1	1.10804	2.60903	6.1038	1.28796e-09	2.88016e-08	11.0355
KIAA0922	1.00691	1.11759	6.10037	1.31528e-09	2.93206e-08	11.0151
FGD2	1.12254	5.30238	6.08045	1.48551e-09	3.27297e-08	10.8969
TMEM123	1.47902	3.86626	6.07194	1.56461e-09	3.43545e-08	10.8465
SPINT2	1.54599	4.81913	6.03218	1.99209e-09	4.31226e-08	10.612
PTGER4	1.40392	2.89564	6.032	1.99421e-09	4.31226e-08	10.611
EIF4G3	1.15262	2.2936	6.00347	2.36951e-09	5.08641e-08	10.4436
TET2	1.30257	3.76817	6.00329	2.37205e-09	5.08641e-08	10.4426
SNRPA	1.28087	2.42907	6.00226	2.38685e-09	5.09405e-08	10.4365
HAVCR2	1.41916	4.23674	5.99889	2.43583e-09	5.17987e-08	10.4168
AIF1	1.1534	7.60068	5.97902	2.74513e-09	5.79915e-08	10.3008
NFKB1	1.15581	2.1682	5.97659	2.78546e-09	5.87467e-08	10.2866
THAP9-AS1	1.24197	1.85674	5.958	3.11403e-09	6.53539e-08	10.1784
CASP9	1.14452	1.60626	5.95176	3.23253e-09	6.75093e-08	10.1422
HCLS1	1.20787	6.99361	5.93849	3.49946e-09	7.24937e-08	10.0652
PIP4K2A	1.18952	4.56339	5.92188	3.86368e-09	7.95249e-08	9.96919
ELMO1	1.42357	3.83005	5.91732	3.97003e-09	8.13222e-08	9.94286
CXCL16	1.44333	5.40203	5.9053	4.26408e-09	8.70673e-08	9.87356
RASSF5	1.32294	2.74154	5.88686	4.75702e-09	9.65178e-08	9.76747
GABARAPL2	1.54644	4.85663	5.85392	5.77923e-09	1.16338e-07	9.57876
HGSNAT	1.05313	1.83921	5.84926	5.94027e-09	1.19205e-07	9.55212
AOAH	1.39286	4.28783	5.83352	6.5162e-09	1.29949e-07	9.46242
FAM118A	1.08838	1.34797	5.79904	7.97523e-09	1.5685e-07	9.26663
TUBA1B	1.37872	7.854	5.74293	1.10538e-08	2.13791e-07	8.95042
HSPD1	1.44656	5.28752	5.69295	1.47481e-08	2.81002e-07	8.67126
TPI1	1.15289	8.69562	5.68744	1.52224e-08	2.89609e-07	8.64062
PHLDA2	1.12605	1.49309	5.6756	1.62922e-08	3.08134e-07	8.57489
HMHA1	1.33982	3.86793	5.66565	1.72471e-08	3.24758e-07	8.51976
NR4A1	1.43778	5.47141	5.65403	1.8432e-08	3.45546e-07	8.45547
CYTIP	1.37812	4.78989	5.64559	1.93407e-08	3.60998e-07	8.40891
ARL4C	1.05297	2.09931	5.64067	1.98906e-08	3.69648e-07	8.38178
MYD88	1.38555	6.06302	5.62806	2.1371e-08	3.96012e-07	8.31233
BLOC1S6	1.07865	2.2833	5.6114	2.34917e-08	4.32808e-07	8.22082
MAP3K13	1.14143	1.63765	5.58069	2.79498e-08	5.1127e-07	8.05278
MKL1	1.19822	3.41033	5.57593	2.87101e-08	5.2443e-07	8.02683
ZYX	1.01573	5.11207	5.55502	3.22973e-08	5.84955e-07	7.91301
VPS35	1.21381	4.13626	5.53903	3.53285e-08	6.32705e-07	7.8263
TYMP	1.15668	5.97258	5.51845	3.96411e-08	7.03068e-07	7.71499
EIF3CL	1.07851	3.84568	5.49724	4.46181e-08	7.81669e-07	7.60072
HAPLN3	1.01545	1.24586	5.49115	4.61552e-08	8.06332e-07	7.568
LILRA1	1.18871	2.29345	5.486	4.74959e-08	8.28625e-07	7.54034
BCL6	1.31869	3.34212	5.46625	5.29954e-08	9.18526e-07	7.43451
AMICA1	1.50075	5.6478	5.46621	5.3007e-08	9.18526e-07	7.4343
C19orf38	1.09742	1.55	5.43302	6.36738e-08	1.09156e-06	7.25726
GBP1	1.40066	3.3174	5.43234	6.39116e-08	1.09418e-06	7.25366
SUB1	1.29034	6.54264	5.42206	6.76292e-08	1.15628e-06	7.19908
STX11	1.25082	2.57105	5.38274	8.38915e-08	1.42106e-06	6.99111
CASP1	1.36835	4.01825	5.37184	8.90298e-08	1.49575e-06	6.93375
WBSCR22	1.29942	3.33423	5.35717	9.64371e-08	1.60808e-06	6.85665
NAAA	1.31749	3.15632	5.3513	9.95636e-08	1.65376e-06	6.82588
RIPK2	1.24141	4.0413	5.34391	1.03637e-07	1.71697e-06	6.78721
TNFAIP2	1.31764	4.63255	5.32794	1.13005e-07	1.85777e-06	6.70375
PLCB2	1.31253	4.09341	5.30578	1.27372e-07	2.07798e-06	6.58835
EEF1B2	1.14835	7.99469	5.29918	1.31983e-07	2.1423e-06	6.55407
RP11-386G11.10	1.15204	6.49929	5.29332	1.36209e-07	2.20254e-06	6.52368
PSME2	1.33237	7.84556	5.28123	1.45353e-07	2.33567e-06	6.46106
UVRAG	1.11437	2.48736	5.2608	1.62175e-07	2.57373e-06	6.35552
FES	1.23141	2.86196	5.25827	1.64381e-07	2.60028e-06	6.3425
ARF5	1.28882	5.13644	5.25587	1.66502e-07	2.62615e-06	6.33015
RAB7L1	1.13772	2.33366	5.25534	1.66973e-07	2.63034e-06	6.32743
FAM26F	1.52755	4.57152	5.25322	1.68877e-07	2.65381e-06	6.31651
FLOT2	1.1482	2.92129	5.24269	1.78646e-07	2.79704e-06	6.26233
SULF2	1.14669	2.77733	5.22283	1.98561e-07	3.08998e-06	6.16052
DOCK10	1.20249	3.76124	5.18366	2.44344e-07	3.76023e-06	5.96074
CD69	1.29609	2.11094	5.1788	2.50693e-07	3.84527e-06	5.93604
ANXA1	1.20094	6.79782	5.17793	2.51837e-07	3.85819e-06	5.93166
EIF3L	1.25151	6.71295	5.1595	2.77504e-07	4.20618e-06	5.83825
TSC22D2	1.03439	2.66961	5.1543	2.85192e-07	4.31252e-06	5.81195
CPPED1	1.10393	2.85158	5.12336	3.35356e-07	5.01782e-06	5.65605
UNC119	1.09675	1.80764	5.11704	3.46605e-07	5.17405e-06	5.62431
NR4A3	1.10272	3.66784	5.10691	3.65385e-07	5.43542e-06	5.57356
ANKRD44	1.20393	3.2477	5.1049	3.69226e-07	5.47985e-06	5.5635
LDHA	1.12559	8.49381	5.06641	4.50836e-07	6.63728e-06	5.3715
CMTM6	1.05863	5.38496	5.05806	4.70723e-07	6.91896e-06	5.33
PLSCR1	1.21175	6.08871	5.05792	4.71049e-07	6.91896e-06	5.32934
CSK	1.12538	3.1002	5.02384	5.61371e-07	8.12467e-06	5.16077
LGALS9	1.09408	6.37848	5.01874	5.76249e-07	8.31186e-06	5.13564
PRMT2	1.19139	3.72076	4.99335	6.56166e-07	9.39065e-06	5.0109
TOB1	1.23696	4.72018	4.98083	6.99404e-07	9.96495e-06	4.94962
CDC37	1.11344	6.3122	4.97447	7.2239e-07	1.02583e-05	4.91857
TAOK3	1.17645	3.85018	4.97246	7.29807e-07	1.03521e-05	4.90877
DDX3Y	1.06187	1.76098	4.96588	7.54625e-07	1.06688e-05	4.87666
SCNM1	1.21089	3.02033	4.95569	7.94669e-07	1.11733e-05	4.82703
RPL36	1.008	7.71242	4.93272	8.92546e-07	1.24278e-05	4.71556
SELK	1.29934	4.96208	4.93152	8.9798e-07	1.24889e-05	4.70974
ZFP36L1	1.08683	7.51511	4.92139	9.45002e-07	1.30019e-05	4.66077
EIF3K	1.18437	6.79383	4.90213	1.04108e-06	1.41717e-05	4.56789
RP11-1100L3.8	1.25011	4.54439	4.89308	1.08942e-06	1.47359e-05	4.52436
C7orf50	1.11852	2.68614	4.87068	1.21852e-06	1.63957e-05	4.41697
ETS2	1.12144	3.55911	4.86875	1.23037e-06	1.65377e-05	4.4077
MAP3K8	1.23866	3.92255	4.86277	1.26758e-06	1.69836e-05	4.37913
SRSF2	1.14109	5.98387	4.84984	1.35182e-06	1.80191e-05	4.31746
LILRA2	1.10914	2.41513	4.84804	1.36399e-06	1.81436e-05	4.30887
NAP1L1	1.09991	6.20924	4.82235	1.54922e-06	2.04523e-05	4.18686
RP1-257A7.5	1.36622	4.53463	4.81862	1.57804e-06	2.0763e-05	4.1692
CTSH	1.21831	7.35078	4.81853	1.57872e-06	2.0763e-05	4.16879
FBL	1.21386	3.306	4.81215	1.62929e-06	2.13188e-05	4.13858
DCTPP1	1.00098	2.08527	4.79055	1.81216e-06	2.3426e-05	4.03671
ID2	1.33614	5.10491	4.75172	2.1917e-06	2.79922e-05	3.85468
SNX20	1.07582	3.06116	4.73514	2.37611e-06	3.01076e-05	3.77737
NFE2L2	1.15003	4.79665	4.73444	2.3843e-06	3.01815e-05	3.77408
DECR1	1.2323	4.00048	4.72423	2.5055e-06	3.14672e-05	3.72665
EIF3M	1.29433	5.6583	4.70422	2.76062e-06	3.43018e-05	3.63391
MFNG	1.09082	3.05053	4.69973	2.82121e-06	3.49868e-05	3.61315
EIF3H	1.09317	5.84349	4.69934	2.82654e-06	3.5019e-05	3.61134
VRK2	1.02993	2.45432	4.69187	2.93033e-06	3.62e-05	3.57686
RHOG	1.10588	5.74586	4.68005	3.10202e-06	3.82105e-05	3.52243
NAMPT	1.02968	6.83212	4.67619	3.16022e-06	3.88529e-05	3.50466
DBNL	1.06611	5.95999	4.65849	3.44054e-06	4.18975e-05	3.42344
TYK2	1.2212	3.57842	4.65173	3.55383e-06	4.30319e-05	3.39248
CYB5R3	1.04353	3.91381	4.65145	3.55847e-06	4.30475e-05	3.39123
LMNA	1.19271	4.05505	4.64549	3.66155e-06	4.41278e-05	3.36395
ATP1A1	1.03022	3.90253	4.64513	3.66772e-06	4.41607e-05	3.36234
DEF6	1.04898	2.70256	4.64189	3.72499e-06	4.48082e-05	3.34754
NFKBID	1.21187	4.14324	4.60547	4.43032e-06	5.25046e-05	3.18193
G3BP2	1.0214	3.06792	4.56158	5.45118e-06	6.28602e-05	2.98403
CRIP1	1.19102	4.68181	4.498	7.33783e-06	8.19626e-05	2.70064
TRAF3IP3	1.03019	1.98585	4.49661	7.38544e-06	8.23508e-05	2.69448
CECR1	1.07526	5.12999	4.48195	7.90501e-06	8.7611e-05	2.6297
RP11-345J4.6	1.31194	4.8955	4.47229	8.2664e-06	9.10654e-05	2.58712
CCNH	1.177	3.97735	4.4633	8.61649e-06	9.44353e-05	2.54761
UBE2E2	1.04045	3.07337	4.44651	9.30915e-06	0.00010082	2.47399
FAM49B	1.03696	6.4271	4.41965	1.05297e-05	0.000112706	2.35672
PSMB10	1.03821	6.16334	4.30041	1.8045e-05	0.000183062	1.84471
XRCC6	1.0043	5.76961	4.29555	1.84404e-05	0.000186631	1.82413
PSMB9	1.20407	5.5505	4.27793	1.99443e-05	0.000200584	1.74972
RPS21	1.04248	7.42959	4.2718	2.04947e-05	0.00020546	1.72389
SNRPD1	1.00922	3.46398	4.25905	2.16858e-05	0.000216739	1.6703
RILPL2	1.04731	3.63479	4.22922	2.47356e-05	0.000242681	1.54551
HSD17B10	1.02376	2.94661	4.22242	2.54849e-05	0.00024927	1.51722
PSMD8	1.02233	5.26019	4.21389	2.64566e-05	0.000257595	1.48176
LY6E	1.03444	3.75196	4.20761	2.71952e-05	0.000263985	1.45566
EPSTI1	1.00044	3.25011	4.14313	3.59927e-05	0.000337764	1.19027
ETFA	1.05642	3.74023	4.14057	3.63931e-05	0.000340416	1.1798
NME1-NME2	1.00668	6.86954	4.08916	4.53744e-05	0.000415005	0.971224
RAB24	1.04935	3.31874	4.07604	4.79845e-05	0.000435768	0.918375
CLNS1A	1.07937	3.85885	4.06548	5.01868e-05	0.000452563	0.875983
EIF6	1.04955	4.18607	4.04874	5.38774e-05	0.000481513	0.808971
MTHFD2	1.03061	4.49463	4.00644	6.43791e-05	0.000560444	0.640915
TAP1	1.01572	5.04894	4.00463	6.48684e-05	0.00056432	0.633774
CCND3	1.03431	4.09144	3.97781	7.25574e-05	0.000621005	0.528154

## Sheet: Monocytes
	logFC	AveExpr	t	P.Value	adj.P.Val	B
SERPINA1	3.88439	6.9765	28.4958	1.28571e-145	8.67717e-143	321.96
LYZ	3.60349	8.85103	27.6858	6.39033e-139	3.56275e-136	306.592
IFI30	3.17711	10.4445	27.102	3.87075e-134	1.98538e-131	295.617
C5AR1	3.39818	3.47004	25.9551	7.35432e-125	3.36802e-122	274.324
FCGR2A	3.4796	5.89303	24.6754	1.04432e-114	4.05796e-112	251.028
LRP1	2.56988	3.84317	24.5713	6.82607e-114	2.57443e-111	249.158
CD14	3.83645	6.63528	24.4333	8.1849e-113	2.91542e-110	246.682
PILRA	3.31825	5.20747	23.4491	3.33707e-105	1.09721e-102	229.221
LILRA6	3.05804	4.35676	23.088	1.89022e-102	5.50871e-100	222.904
ITGAX	2.44834	5.29822	22.8573	1.05724e-100	2.88448e-98	218.895
TIMP1	3.74248	7.1598	21.6229	1.6507e-91	4.31979e-89	197.805
APLP2	2.86605	5.589	21.5989	2.47474e-91	6.34672e-89	197.402
APOBEC3A	3.67865	2.11503	21.5025	1.25651e-90	3.15927e-88	195.784
FCGR3A	3.77029	5.27406	21.2116	1.65279e-88	4.07571e-86	190.923
SLC11A1	3.24777	4.43243	21.0538	2.29796e-87	5.35758e-85	188.301
LILRB2	2.83858	4.97977	20.9044	2.74626e-86	6.17812e-84	185.83
FPR1	3.5029	4.29002	20.7811	2.11077e-85	4.51106e-83	183.799
LILRB3	2.4315	3.94693	20.6841	1.04365e-84	2.15851e-82	182.207
RP11-1143G9.4	2.93143	9.13624	20.5898	4.92118e-84	1.00166e-81	180.662
SAT1	1.93896	11.8518	20.4202	7.93473e-83	1.56534e-80	177.893
CD300E	3.34083	2.94826	20.2067	2.57204e-81	4.99717e-79	174.429
CLEC7A	2.35394	5.79972	19.7314	5.47998e-78	1.0184e-75	166.796
VCAN	3.50553	3.81148	19.6283	2.84569e-77	4.99867e-75	165.156
FCN1	4.18562	4.96256	19.266	8.93122e-75	1.50691e-72	159.431
IFITM3	3.38833	6.11276	19.0347	3.38433e-73	5.49333e-71	155.812
LGALS3	2.84368	6.30342	18.4369	3.56742e-69	4.97229e-67	146.589
S100A9	3.57237	5.7258	18.3275	1.90328e-68	2.62427e-66	144.923
CEBPB	1.61783	1.80876	18.1643	2.28568e-67	3.08519e-65	142.448
LCP2	2.50577	4.74704	18.0122	2.28959e-66	2.93594e-64	140.154
ASAH1	2.89745	5.99725	18.0028	2.63824e-66	3.34952e-64	140.013
CFD	3.00628	2.53306	17.8951	1.33609e-65	1.67968e-63	138.399
XXbac-BPG252P9.10	2.48044	2.61335	17.65	5.23568e-64	5.99439e-62	134.747
LILRA3	2.47609	2.10501	17.5873	1.33211e-63	1.47255e-61	133.818
CTSL	3.15244	4.63688	17.521	3.56079e-63	3.83697e-61	132.839
AIF1	2.33518	7.60068	17.3437	4.88642e-62	5.13595e-60	130.233
MS4A7	2.95495	4.20091	17.3418	5.02452e-62	5.23816e-60	130.205
IER3	3.16505	4.25384	16.9158	2.51891e-59	2.46565e-57	124.018
RP11-290F20.3	2.71091	3.17328	16.7639	2.25463e-58	2.12581e-56	121.837
CSF3R	2.61846	4.33672	16.6766	7.89545e-58	7.2837e-56	120.59
MSR1	2.52417	3.07962	16.6142	1.92574e-57	1.75133e-55	119.703
FCGR3B	1.99785	1.97492	16.5906	2.70056e-57	2.43869e-55	119.367
FTH1	1.05209	12.9374	16.3891	4.72594e-56	4.01329e-54	116.519
MAFB	2.20783	2.45924	16.3351	1.01393e-55	8.33436e-54	115.76
TLR2	2.19211	3.83084	16.3344	1.02454e-55	8.36798e-54	115.75
FTL	1.1688	13.1591	16.2907	1.89751e-55	1.53998e-53	115.137
BEST1	1.45613	2.70692	16.1245	1.9554e-54	1.54503e-52	112.816
SOD2	2.70299	7.04302	15.9618	1.88725e-53	1.45785e-51	110.561
COTL1	2.11248	6.91487	15.5879	3.24327e-51	2.34963e-49	105.442
SLC25A37	2.38265	3.24322	15.3624	6.91862e-50	4.87459e-48	102.399
PLIN2	3.00919	4.69771	15.1258	1.65664e-48	1.12397e-46	99.2415
NAMPT	2.30669	6.83212	15.009	7.83631e-48	5.23359e-46	97.6965
S100A8	3.09183	4.13654	14.7678	1.8847e-46	1.22678e-44	94.535
FTH1P10	1.16683	3.25607	14.5838	2.07739e-45	1.27456e-43	92.1495
TNFAIP2	2.51204	4.63255	14.5533	3.08703e-45	1.84977e-43	91.7558
HIF1A	2.22907	5.96676	14.5328	4.02315e-45	2.39948e-43	91.4926
S100A11	1.60802	9.77521	14.5052	5.75597e-45	3.41708e-43	91.1366
VMP1	1.85385	6.98845	14.3221	6.06652e-44	3.44208e-42	88.7959
STAB1	2.38511	3.40266	14.3068	7.37565e-44	4.16643e-42	88.6018
HK3	2.1346	3.89628	14.2566	1.40062e-43	7.74142e-42	87.9645
NEAT1	1.27233	6.40773	14.2244	2.11069e-43	1.15172e-41	87.5569
ARRB2	1.44367	3.20356	14.2188	2.26705e-43	1.2318e-41	87.4859
DUSP6	2.45875	3.58551	14.146	5.71782e-43	3.09366e-41	86.5666
UBXN11	1.95371	3.99953	13.9245	9.32742e-42	4.70888e-40	83.7925
FTLP3	1.2206	5.47122	13.8441	2.54779e-41	1.27122e-39	82.7942
ZFP36L1	2.12671	7.51511	13.7977	4.53967e-41	2.23893e-39	82.2204
SIGLEC14	1.93084	3.11782	13.7898	5.00519e-41	2.44037e-39	82.1234
CTSD	2.2424	7.49245	13.7636	6.92974e-41	3.35321e-39	81.8002
TYROBP	1.47991	10.6158	13.7422	9.04421e-41	4.32739e-39	81.5356
NAMPTL	1.94081	4.07769	13.622	3.99189e-40	1.82164e-38	80.0608
DPYD	1.73482	3.56524	13.5842	6.35683e-40	2.86013e-38	79.5986
FGL2	1.89229	4.67656	13.4304	4.17054e-39	1.79459e-37	77.7303
PLAUR	2.29294	7.78668	13.3472	1.14435e-38	4.82696e-37	76.7278
FGR	2.10463	5.12804	13.3388	1.26749e-38	5.31143e-37	76.6263
TREM1	2.35062	4.61889	13.3046	1.91821e-38	7.96025e-37	76.2149
AQP9	1.82416	2.32294	13.0138	6.2463e-37	2.39093e-35	72.7562
SDS	1.9119	1.37736	12.9563	1.23416e-36	4.60047e-35	72.0801
CFP	2.4011	3.48433	12.8838	2.90335e-36	1.05169e-34	71.2309
IFNGR2	1.90259	5.58268	12.7023	2.43278e-35	8.4085e-34	69.1208
GBP1	2.28351	3.3174	12.689	2.83987e-35	9.71084e-34	68.9672
CSF1R	1.88052	5.77765	12.6384	5.11257e-35	1.72978e-33	68.3836
IFI6	2.43231	4.6003	12.5511	1.40275e-34	4.64794e-33	67.3819
DDX60L	1.65121	1.60127	12.5077	2.31336e-34	7.56741e-33	66.8855
DMXL2	1.77372	3.00186	12.484	3.0356e-34	9.87956e-33	66.6159
LILRA5	2.14771	2.82362	12.4392	5.07322e-34	1.61826e-32	66.1062
GBP2	2.10065	4.04349	12.3882	9.08284e-34	2.85464e-32	65.5283
MARCKS	1.50575	2.68934	12.25	4.3655e-33	1.31406e-31	63.9706
SIGLEC1	1.50812	1.60179	12.2435	4.69833e-33	1.41093e-31	63.8977
SLC7A7	1.85078	4.1008	12.1919	8.40306e-33	2.4601e-31	63.321
CD63	1.93313	7.64543	12.182	9.39564e-33	2.74443e-31	63.2102
GBP5	1.85973	2.02684	12.1686	1.09242e-32	3.14082e-31	63.0607
ANXA5	1.58723	7.74444	12.0878	2.70445e-32	7.60507e-31	62.1614
FTH1P7	1.22436	3.90407	11.937	1.44689e-31	3.98999e-30	60.4979
CD44	1.61268	7.69138	11.8305	4.68274e-31	1.26949e-29	59.3332
C3AR1	1.89197	4.00733	11.7784	8.28991e-31	2.21461e-29	58.7668
ANXA1	1.89004	6.79782	11.6756	2.54067e-30	6.54197e-29	57.6563
CD163	2.013	4.59414	11.5902	6.41026e-30	1.6277e-28	56.7387
RP11-701P16.2	1.16844	0.994238	11.5792	7.22027e-30	1.82975e-28	56.6208
FPR2	1.61508	1.4406	11.5548	9.39208e-30	2.35684e-28	56.3601
NCF2	1.77439	5.17917	11.4816	2.06022e-29	5.06095e-28	55.5814
PID1	1.449	1.49129	11.4486	2.93383e-29	7.16791e-28	55.231
UPP1	1.87404	4.44969	11.4465	3.00173e-29	7.30384e-28	55.2083
OASL	1.42828	1.07851	11.4341	3.42532e-29	8.27173e-28	55.0774
ACSL1	1.84725	3.70878	11.412	4.33605e-29	1.0354e-27	54.8438
FLNA	1.58569	5.73267	11.3528	8.14107e-29	1.90498e-27	54.2194
SLC43A2	1.4516	2.66022	11.346	8.74272e-29	2.04204e-27	54.1487
RHOB	1.28718	1.76281	11.2567	2.24853e-28	5.15795e-27	53.2126
LILRA2	1.79571	2.41513	11.2458	2.52195e-28	5.76452e-27	53.0988
ITGB2	1.25451	8.17154	11.2242	3.16434e-28	7.11866e-27	52.874
AOAH	1.86966	4.28783	11.2191	3.33872e-28	7.48469e-27	52.8208
IL1B	2.58988	4.39791	11.1236	9.0771e-28	1.97616e-26	51.8298
OLR1	1.89389	3.61788	11.104	1.11359e-27	2.40803e-26	51.6273
FTH1P16	1.04144	2.19811	11.0386	2.19673e-27	4.71048e-26	50.9542
THBS1	1.59311	1.11678	11.0188	2.69635e-27	5.75297e-26	50.7512
BCL2A1	2.18758	5.71761	10.995	3.44798e-27	7.32011e-26	50.5076
SAMSN1	1.7552	3.60567	10.9289	6.81229e-27	1.42039e-25	49.8331
GLUL	1.81918	7.76021	10.9108	8.20052e-27	1.69519e-25	49.6494
FTH1P20	1.0406	2.42399	10.8556	1.44411e-26	2.93003e-25	49.0889
SLA	1.7233	3.61881	10.7788	3.15496e-26	6.29177e-25	48.3149
NLRP3	1.7175	2.91035	10.7619	3.74819e-26	7.44011e-25	48.1443
FCGR1A	1.85509	4.04018	10.7506	4.2004e-26	8.32416e-25	48.0315
ARHGAP26	1.45548	2.28537	10.736	4.87138e-26	9.59451e-25	47.8848
TSPO	1.76591	6.88064	10.7104	6.31232e-26	1.23766e-24	47.6282
ALDH1A2	1.18286	1.03476	10.6905	7.7137e-26	1.49667e-24	47.4296
IFIT3	1.64891	1.70463	10.6633	1.01441e-25	1.95606e-24	47.1584
FNDC3B	1.39502	2.72843	10.6586	1.064e-25	2.04247e-24	47.1112
PLXDC2	1.43091	4.56774	10.6143	1.65883e-25	3.12811e-24	46.6715
C9orf72	1.64309	4.87406	10.5251	4.04457e-25	7.47313e-24	45.7892
DUSP1	1.81567	9.08288	10.4385	9.54407e-25	1.71406e-23	44.9393
RCBTB2	1.46545	1.87818	10.3689	1.89584e-24	3.32109e-23	44.2601
ETS2	1.66551	3.55911	10.36	2.06768e-24	3.60243e-23	44.1742
FTH1P23	1.02183	2.49461	10.2743	4.7819e-24	8.12164e-23	43.3446
TNFAIP3	2.01605	5.78054	10.1804	1.18967e-23	1.93839e-22	42.4428
MERTK	1.15767	1.18364	9.93355	1.26309e-22	1.92359e-21	40.106
SIRPA	1.09318	2.69018	9.84578	2.88997e-22	4.29908e-21	39.2876
FTH1P8	1.02729	2.47646	9.84515	2.90723e-22	4.31974e-21	39.2817
SLC31A2	1.62612	4.08585	9.81659	3.80036e-22	5.59495e-21	39.0169
CASP1	1.74254	4.01825	9.80128	4.3863e-22	6.43542e-21	38.8751
CCRL2	1.53678	2.09008	9.77625	5.54239e-22	8.04871e-21	38.6438
HPSE	1.23636	1.35125	9.72933	8.58141e-22	1.22949e-20	38.2117
IL8	2.14038	4.14552	9.71167	1.01107e-21	1.44215e-20	38.0496
HBEGF	1.64642	3.6307	9.69054	1.22999e-21	1.74857e-20	37.8559
HMOX1	1.54395	2.88469	9.68171	1.33474e-21	1.88495e-20	37.7751
GCH1	1.0488	1.04681	9.6627	1.59145e-21	2.23517e-20	37.6012
PDK4	1.10071	0.908108	9.62147	2.32794e-21	3.24469e-20	37.2253
CCL3	2.08234	5.18438	9.59536	2.95964e-21	4.09843e-20	36.9881
PTGER2	1.13749	1.14282	9.56829	3.79383e-21	5.21723e-20	36.7427
TNFRSF1B	1.49106	4.70089	9.50313	6.88019e-21	9.32607e-20	36.1545
GPBAR1	1.09095	0.864045	9.4728	9.06569e-21	1.21855e-19	35.882
PRAM1	1.25713	1.83369	9.42864	1.35289e-20	1.80334e-19	35.4865
EREG	1.23424	1.31542	9.38735	1.96412e-20	2.57525e-19	35.1183
MYO1F	1.3039	4.96229	9.30079	4.27093e-20	5.46568e-19	34.3511
EGR1	1.58133	3.79244	9.29391	4.54174e-20	5.78339e-19	34.2903
CLEC4E	1.49616	2.25126	9.29304	4.57709e-20	5.81685e-19	34.2827
CTSS	1.11579	9.15416	9.27588	5.33448e-20	6.73059e-19	34.1315
NINJ1	1.67824	5.70056	9.26978	5.63257e-20	7.08797e-19	34.0778
LYST	1.27716	2.29534	9.22067	8.71675e-20	1.07891e-18	33.6466
CCL3L3	1.3039	2.08776	9.21496	9.16898e-20	1.13161e-18	33.5967
MPP1	1.54935	4.24663	9.206	9.92653e-20	1.22157e-18	33.5183
TMEM176B	1.80484	3.61944	9.18068	1.2419e-19	1.51521e-18	33.2971
ALOX5	1.28755	4.95845	9.16071	1.4813e-19	1.79874e-18	33.1231
IL1RN	1.8809	4.19869	9.15908	1.50282e-19	1.82314e-18	33.1088
DOCK5	1.03944	3.08222	9.13924	1.7898e-19	2.16108e-18	32.9363
ZEB2	1.31966	6.14404	9.08215	2.95408e-19	3.49126e-18	32.4417
ZYX	1.15728	5.11207	9.06816	3.33861e-19	3.92043e-18	32.3209
GIMAP4	1.45827	2.88907	9.06182	3.52868e-19	4.13983e-18	32.2663
MTSS1	1.30962	2.05771	9.01725	5.20417e-19	6.01198e-18	31.8828
NFKBIA	1.60348	8.41545	9.00264	5.90888e-19	6.76515e-18	31.7575
IRAK3	1.14805	2.02323	9.0021	5.9364e-19	6.78675e-18	31.7529
APOBEC3B	1.0231	1.08583	8.88705	1.60331e-18	1.76323e-17	30.7726
GPCPD1	1.25642	3.72132	8.86535	1.93121e-18	2.11657e-17	30.589
FCGR1B	1.3429	2.80398	8.70275	7.69007e-18	7.98459e-17	29.2262
MXD1	1.48304	4.55251	8.69925	7.9206e-18	8.2173e-17	29.1971
CXCL2	1.85089	3.37885	8.66878	1.02346e-17	1.05243e-16	28.9444
MGAT1	1.26049	6.65996	8.6561	1.13843e-17	1.16692e-16	28.8394
FCER1G	1.12283	10.4372	8.65524	1.14662e-17	1.17388e-16	28.8323
PTAFR	1.24729	3.72063	8.55023	2.75334e-17	2.71794e-16	27.9688
RN7SL368P	1.2764	1.56481	8.5442	2.89458e-17	2.85297e-16	27.9195
TBXAS1	1.33535	4.51914	8.46674	5.48775e-17	5.28299e-16	27.2891
CCR1	1.23946	2.94317	8.45972	5.81397e-17	5.5761e-16	27.2322
LILRA1	1.27921	2.29345	8.45853	5.87119e-17	5.61838e-16	27.2226
P2RX4	1.30441	2.73834	8.45023	6.28547e-17	5.99692e-16	27.1554
ANPEP	1.40149	3.74805	8.41689	8.26052e-17	7.81155e-16	26.8862
OAS3	1.23691	2.13042	8.41199	8.59807e-17	8.11281e-16	26.8467
NFAM1	1.03828	2.42302	8.40896	8.8136e-17	8.30395e-16	26.8223
C19orf38	1.18016	1.55	8.37106	1.20071e-16	1.12139e-15	26.5177
GRINA	1.09116	3.06465	8.35614	1.35576e-16	1.25795e-15	26.3981
CD68	1.09262	8.22638	8.34812	1.44695e-16	1.336e-15	26.334
IL10	1.05038	1.07501	8.27421	2.63116e-16	2.37768e-15	25.7451
GK	1.26899	4.04484	8.19355	5.02555e-16	4.40483e-15	25.1079
S100A4	1.50148	7.54045	8.15109	7.04871e-16	6.10714e-15	24.7749
C10orf54	1.32271	5.61908	8.14826	7.2095e-16	6.23802e-15	24.7527
ITM2B	1.0234	8.1	8.12953	8.36553e-16	7.22365e-15	24.6063
TXNIP	1.47575	5.85713	8.08041	1.23373e-15	1.04978e-14	24.2239
ZCCHC6	1.05983	2.21621	8.07321	1.30587e-15	1.10822e-14	24.168
MMP19	1.16948	1.69045	8.05684	1.48551e-15	1.2532e-14	24.0412
SDCBP	1.28104	6.62897	8.01646	2.03965e-15	1.69394e-14	23.7292
HCK	1.15692	5.86378	7.95566	3.27851e-15	2.6591e-14	23.2623
EMP3	1.13642	6.90096	7.93874	3.73909e-15	3.0155e-14	23.133
ARAP1	1.15507	3.99664	7.91521	4.4875e-15	3.59421e-14	22.9536
TNF	1.30093	2.09286	7.87584	6.08335e-15	4.78569e-14	22.6543
IVNS1ABP	1.27732	4.41741	7.87133	6.29849e-15	4.94887e-14	22.6202
NPL	1.17337	2.4905	7.84902	7.47805e-15	5.83989e-14	22.4514
PELI1	1.11866	1.87742	7.81935	9.38987e-15	7.25776e-14	22.2275
CCL2	1.60271	2.59791	7.64905	3.4169e-14	2.50945e-13	20.958
XAF1	1.24778	3.01404	7.63598	3.76886e-14	2.75177e-13	20.8617
ADM	1.39187	2.48981	7.62065	4.22769e-14	3.07149e-13	20.7488
TYMP	1.1116	5.97258	7.59846	4.99022e-14	3.60505e-13	20.5859
RP11-34P13.13	1.01753	2.91384	7.56432	6.43578e-14	4.60525e-13	20.3361
TNFRSF1A	1.18762	4.56741	7.55552	6.8705e-14	4.89991e-13	20.2719
CXCL10	1.37466	1.40382	7.55422	6.93698e-14	4.93908e-13	20.2624
CECR1	1.25996	5.12999	7.52458	8.6419e-14	6.07539e-13	20.0466
FYB	1.13319	5.08761	7.49877	1.04571e-13	7.27287e-13	19.8594
RP11-325F22.2	1.06567	1.68646	7.32917	3.60746e-13	2.37101e-12	18.644
MYO1G	1.09843	2.59377	7.26337	5.79222e-13	3.7174e-12	18.1795
TCN2	1.06301	1.75709	7.24899	6.42059e-13	4.10425e-12	18.0785
CPVL	1.31709	5.21048	7.21831	7.99317e-13	5.06155e-12	17.8636
LPAR6	1.0566	2.12307	7.18257	1.03062e-12	6.44982e-12	17.6144
CREG1	1.16028	3.66301	7.11815	1.62477e-12	9.94006e-12	17.1682
C19orf59	1.10222	1.74505	7.08726	2.01839e-12	1.21625e-11	16.9556
SLC15A3	1.16304	2.46054	7.08096	2.10958e-12	1.26644e-11	16.9123
CLEC12A	1.2081	2.51167	7.07561	2.19004e-12	1.31228e-11	16.8756
LST1	1.18821	6.42896	7.05151	2.59189e-12	1.53941e-11	16.7105
PTK2B	1.11976	3.86255	6.96116	4.85087e-12	2.80952e-11	16.0966
BACH1	1.06584	2.90242	6.94995	5.24043e-12	3.02149e-11	16.0209
SCIMP	1.04693	3.32729	6.86689	9.25706e-12	5.17795e-11	15.4639
ARAP1-AS1	1.06419	3.26536	6.80877	1.37323e-11	7.50915e-11	15.0779
CARD16	1.27261	4.07797	6.79291	1.52855e-11	8.31942e-11	14.9731
BNIP3L	1.10632	4.51741	6.75132	2.02202e-11	1.08578e-10	14.6994
CD36	1.26784	3.07369	6.65255	3.90489e-11	2.01499e-10	14.0558
MNDA	1.06581	4.95691	6.34656	2.83699e-10	1.32624e-09	12.119
KYNU	1.07471	4.52193	6.2913	4.02243e-10	1.8395e-09	11.7784
IER2	1.04568	6.50923	6.2338	5.76704e-10	2.5884e-09	11.4272
TCIRG1	1.02761	6.38614	6.21173	6.61696e-10	2.94411e-09	11.2932
EPSTI1	1.044	3.25011	6.19456	7.36208e-10	3.25531e-09	11.1892
RAB20	1.05361	3.45859	6.11818	1.17932e-09	5.07431e-09	10.7301
VAMP5	1.19777	3.65846	6.11698	1.18802e-09	5.10485e-09	10.7229
CTSA	1.03879	5.52322	6.11475	1.20443e-09	5.17227e-09	10.7096
BLVRA	1.05137	3.84662	6.05224	1.76386e-09	7.42303e-09	10.3381
TNFSF10	1.08021	2.75704	6.00113	2.40319e-09	9.96962e-09	10.0371
CXCL3	1.12249	2.5043	5.93156	3.64713e-09	1.48185e-08	9.63125
PLD3	1.02775	4.30391	5.93063	3.66733e-09	1.48959e-08	9.62588
CCL3L1	1.1176	2.69472	5.85554	5.72447e-09	2.27542e-08	9.19296
RAB24	1.04913	3.31874	5.8388	6.31731e-09	2.49559e-08	9.09719
CCL4	1.29453	3.37165	5.79501	8.16501e-09	3.18818e-08	8.84792
G0S2	1.37043	3.64278	5.65941	1.7874e-08	6.68411e-08	8.08733
CASP4	1.02267	4.90075	5.5017	4.35227e-08	1.55328e-07	7.22462
CD48	1.00817	4.30112	5.35525	9.74442e-08	3.31176e-07	6.44451
ISG15	1.18528	4.94249	5.3226	1.16316e-07	3.9199e-07	6.27334
CCL4L1	1.00091	3.08864	5.10238	3.74104e-07	1.1775e-06	5.14542

## Sheet: Macrophages
	logFC	AveExpr	t	P.Value	adj.P.Val	B
CTB-147C22.3	4.81659	1.39373	74.0927	0	0	1198.77
MT1F	6.03691	1.93437	42.2499	4.07544e-265	8.7099e-262	596.505
CD14	7.66752	6.63528	41.1079	4.92125e-255	9.01503e-252	573.348
MT1G	7.16825	2.03807	39.9876	3.86042e-245	6.18777e-242	550.62
MT1E	5.89145	1.96079	38.588	8.70359e-233	1.24007e-229	522.244
MT1X	6.85886	2.71125	37.7554	1.90341e-225	2.21885e-222	505.384
STEAP3	4.3215	1.47398	37.0008	8.34348e-219	8.9157e-216	490.126
MRC1L1	5.04865	2.39172	36.6378	1.2949e-215	1.18604e-212	482.796
MT1H	5.62447	1.48605	34.1027	1.93103e-193	1.37564e-190	431.859
RAB13	5.09243	2.32686	33.2213	8.61974e-186	5.26338e-183	414.286
HNMT	5.49579	3.07238	32.6577	6.41267e-181	3.5752e-178	403.095
SMPDL3A	4.63895	1.77137	32.6427	8.63148e-181	4.61173e-178	402.798
APOC1	6.33311	2.58741	32.6151	1.49383e-180	7.66218e-178	402.251
FN1	6.66546	2.94679	32.4648	2.94998e-179	1.45491e-176	399.275
FBP1	7.03975	4.97264	31.8892	2.62788e-174	1.24805e-171	387.904
GPNMB	6.29783	3.4308	31.1507	5.48368e-168	2.42473e-165	373.387
SPP1	8.23022	3.84093	30.9047	6.85037e-166	2.92808e-163	368.571
ECM1	3.41439	1.10848	30.6783	5.77669e-164	2.3895e-161	364.147
CD276	4.0093	1.45107	30.5616	5.65255e-163	2.26508e-160	361.871
MARCO	6.62606	3.72692	30.5109	1.52464e-162	5.84757e-160	360.881
CLEC5A	5.47596	2.71671	30.51	1.55047e-162	5.84757e-160	360.865
PLTP	5.66218	2.62787	30.4261	7.98427e-162	2.92521e-159	359.23
RP11-792D21.2	4.28089	1.69804	30.1686	1.20907e-159	4.19023e-157	354.221
SLC2A5	4.32365	1.55326	29.5689	1.37788e-154	4.64961e-152	342.605
MRC1	3.38151	1.51177	29.1996	1.73152e-151	5.69316e-149	335.486
SERPINA1	4.70265	6.9765	29.0415	3.64208e-150	1.16756e-147	332.448
TNS1	4.67387	2.34839	29.0242	5.08287e-150	1.5897e-147	332.115
HK3	5.15642	3.89628	28.9912	9.58866e-150	2.92751e-147	331.482
SLC37A2	4.5111	2.39603	28.8827	7.71747e-149	2.30142e-146	329.401
PDPN	3.33828	1.00409	28.8741	9.10251e-149	2.65276e-146	329.237
VSIG4	6.17741	3.72831	28.8084	3.21781e-148	9.16933e-146	327.977
GPX3	4.38089	1.87462	28.7897	4.60556e-148	1.28385e-145	327.619
SLC39A8	4.28332	1.97218	28.6692	4.65019e-147	1.26871e-144	325.313
ENG	4.90044	3.81681	28.5287	6.85725e-146	1.75861e-143	322.628
CD163	5.81562	4.59414	28.1877	4.6103e-143	1.13688e-140	316.134
LRP1	3.4522	3.84317	27.7863	9.50833e-140	2.30048e-137	308.521
ITGAM	4.55707	3.8058	27.7468	2.01041e-139	4.68717e-137	307.774
PROCR	3.3696	1.13154	27.51	1.77391e-137	4.06194e-135	303.305
SLCO2B1	4.81079	2.49442	27.2814	1.32313e-135	2.97657e-133	299.004
APOE	4.7911	1.98742	27.2739	1.52497e-135	3.3715e-133	298.862
CD151	3.01696	2.02633	27.2029	5.80076e-135	1.26073e-132	297.529
FCGR3A	5.71757	5.27406	27.0788	5.98406e-134	1.27889e-131	295.201
RP11-1143G9.4	4.53583	9.13624	26.8194	7.74327e-132	1.62774e-129	290.351
ACP2	4.40503	2.34345	26.7603	2.33572e-131	4.8308e-129	289.249
SLC7A7	4.80786	4.1008	26.6617	1.4759e-130	3.00403e-128	287.411
TREM2	4.82279	2.0703	26.6149	3.52898e-130	7.07064e-128	286.541
FCGR2B	5.42426	4.06822	26.4176	1.39237e-128	2.7052e-126	282.875
SLC38A6	4.09093	1.91169	26.3835	2.62772e-128	5.02914e-126	282.242
CLEC7A	3.73371	5.79972	26.3464	5.23392e-128	9.86978e-126	281.554
C3AR1	5.02654	4.00733	26.3425	5.62255e-128	1.0449e-125	281.483
PAPSS1	4.34165	2.7172	26.2365	4.02663e-127	7.37622e-125	279.519
MT2A	6.15692	5.28971	26.1357	2.60706e-126	4.7085e-124	277.656
IL7R	3.68091	1.45261	26.1253	3.16092e-126	5.62952e-124	277.464
SLC11A1	4.76689	4.43243	26.0135	2.5011e-125	4.39337e-123	275.401
PLAU	4.85175	2.65959	25.97	5.58609e-125	9.67979e-123	274.6
ARHGEF10L	3.65464	2.07198	25.9001	2.02819e-124	3.46767e-122	273.313
ACTN1	4.25452	3.12416	25.8448	5.6304e-124	9.49981e-122	272.295
ACO1	2.7747	1.03718	25.793	1.46139e-123	2.43369e-121	271.344
MGST3	5.15888	3.97397	25.6407	2.40714e-122	3.95728e-120	268.549
C1QC	5.95008	3.48233	25.5848	6.72009e-122	1.09078e-119	267.525
SPR	3.0264	1.02499	25.5829	6.94846e-122	1.11375e-119	267.492
DOK3	4.32459	2.93356	25.5322	1.76391e-121	2.79242e-119	266.563
MT1L	2.69145	0.691233	25.4931	3.60708e-121	5.64068e-119	265.849
TREM1	5.31174	4.61889	25.3089	1.04998e-119	1.62216e-117	262.487
AGTRAP	4.8683	3.74945	25.1432	2.15415e-118	3.28842e-116	259.474
IL2RA	3.02554	1.01871	25.0848	6.24742e-118	9.42478e-116	258.412
TNS3	4.08793	2.93636	24.9775	4.38932e-117	6.54468e-115	256.468
PDLIM4	2.6482	0.754891	24.8546	4.07831e-116	6.01105e-114	254.244
PCK2	3.83432	2.04886	24.845	4.85429e-116	7.07347e-114	254.071
PTAFR	4.29914	3.72063	24.8091	9.29947e-116	1.32497e-113	253.422
RIN2	3.88731	3.08478	24.7706	1.86745e-115	2.63146e-113	252.727
FCGR2A	4.14652	5.89303	24.7535	2.54408e-115	3.54595e-113	252.419
CCL5	3.2799	1.29675	24.7348	3.56429e-115	4.91451e-113	252.082
CSF1R	4.36818	5.77765	24.7134	5.25048e-115	7.16244e-113	251.696
MT1P3	2.44741	0.626149	24.7065	5.95135e-115	8.03307e-113	251.571
BCAT1	4.17105	2.87775	24.6999	6.69811e-115	8.94687e-113	251.453
LDHAP4	2.61219	2.70973	24.6906	7.92365e-115	1.04747e-112	251.286
NCEH1	3.35585	1.7595	24.6466	1.75617e-114	2.29789e-112	250.492
HPGDS	2.95108	0.892618	24.6052	3.70631e-114	4.80061e-112	249.747
FAM198B	3.07057	1.53273	24.5244	1.59012e-113	2.03901e-111	248.295
MMP9	2.70936	0.977158	24.4624	4.84874e-113	6.15598e-111	247.183
PDE4DIP	4.2948	3.10963	24.3641	2.84027e-112	3.57067e-110	245.42
C1QA	5.98325	3.94255	24.2436	2.46489e-111	3.06867e-109	243.265
PTGR1	2.90869	1.06484	24.2244	3.47317e-111	4.28235e-109	242.923
CTD-2369P2.2	3.78243	2.11943	24.1443	1.45561e-110	1.77765e-108	241.494
APLP2	3.80421	5.589	24.1341	1.74905e-110	2.11585e-108	241.311
SLAMF8	4.4928	3.42325	24.1075	2.81198e-110	3.3699e-108	240.837
MITF	3.31766	1.63244	24.0462	8.39651e-110	9.9693e-108	239.746
ARHGAP18	3.73471	3.1979	24.0169	1.41756e-109	1.66765e-107	239.224
S100A9	5.55256	5.7258	23.9805	2.70923e-109	3.15822e-107	238.578
ABCC3	3.38718	1.58876	23.9674	3.42449e-109	3.95606e-107	238.344
C2	4.16949	2.00545	23.9246	7.34042e-109	8.40412e-107	237.584
A2M	4.44694	2.40895	23.9189	8.11204e-109	9.20537e-107	237.484
PLXND1	4.10366	3.38513	23.9034	1.0695e-108	1.203e-106	237.209
PILRA	4.0159	5.20747	23.8901	1.35551e-108	1.51145e-106	236.972
TSPO	4.67403	6.88064	23.8642	2.14846e-108	2.37497e-106	236.513
PRDX2	4.31375	2.94278	23.8469	2.92118e-108	3.20156e-106	236.207
MS4A4A	4.74624	3.32411	23.8061	6.03466e-108	6.55783e-106	235.483
NRP1	3.83107	3.38022	23.7666	1.21529e-107	1.30955e-105	234.785
ALOX5	3.95097	4.95845	23.6639	7.49959e-107	8.01393e-105	232.97
CCL3	6.0976	5.18438	23.6531	9.09447e-107	9.63789e-105	232.778
EIF4EBP1	4.51141	3.44794	23.6126	1.86007e-106	1.93916e-104	232.065
PMP22	4.31888	2.55311	23.5924	2.66109e-106	2.75186e-104	231.707
SFXN3	3.77085	2.78888	23.5828	3.15265e-106	3.23412e-104	231.538
AP001007.1	3.29407	1.76677	23.4823	1.85732e-105	1.89019e-103	229.77
PLXDC2	3.74262	4.56774	23.3709	1.32241e-104	1.33522e-102	227.813
CACNA2D4	3.81159	1.81307	23.279	6.65104e-104	6.663e-102	226.202
LGALS3	4.26401	6.30342	23.2726	7.45089e-104	7.40642e-102	226.089
SLC31A1	3.69768	2.49843	23.1332	8.58108e-103	8.46425e-101	223.652
DFNA5	2.75687	0.965048	23.1201	1.07817e-102	1.04737e-100	223.424
STOM	4.08149	3.8097	23.1117	1.24904e-102	1.20424e-100	223.277
ANXA2P2	2.84497	4.84762	23.0826	2.07964e-102	1.97535e-100	222.769
DRAM1	3.74139	2.41167	23.0435	4.12049e-102	3.88508e-100	222.087
VAT1	3.74129	2.25397	23.0037	8.25461e-102	7.72619e-100	221.394
EGR2	3.99012	2.23962	22.7764	4.3166e-100	3.98214e-98	217.449
TSPAN4	3.99296	2.49235	22.7759	4.35592e-100	3.98971e-98	217.44
FTL	1.93297	13.1591	22.68	2.30083e-99	2.09245e-97	215.78
PCBD1	3.77558	2.54539	22.5039	4.83389e-98	4.33461e-96	212.744
PLOD1	3.67115	2.36172	22.4122	2.34978e-97	2.07802e-95	211.168
CSTB	3.53128	5.44238	22.404	2.7057e-97	2.37638e-95	211.027
PTGS1	3.53203	2.40178	22.3569	6.0782e-97	5.30209e-95	210.22
GLUL	4.39613	7.76021	22.1958	9.656e-96	8.36614e-94	207.463
MTFP1	3.42633	1.61963	22.0827	6.68781e-95	5.75555e-93	205.534
CALM3	4.17906	4.02958	22.0811	6.87868e-95	5.88035e-93	205.506
HSD3B7	3.07627	1.33641	22.0806	6.93203e-95	5.88672e-93	205.498
SIGLEC9	3.86192	3.23609	21.9961	2.93058e-94	2.47229e-92	204.061
PRKCDBP	2.63366	0.937213	21.9807	3.81459e-94	3.19703e-92	203.798
CTSL	4.67604	4.63688	21.8781	2.18657e-93	1.80893e-91	202.057
STAC	2.1256	0.671638	21.8534	3.32638e-93	2.73424e-91	201.639
HCFC1R1	3.11683	1.88378	21.8228	5.59594e-93	4.5705e-91	201.12
PYGL	3.36609	2.05976	21.7997	8.27941e-93	6.71942e-91	200.73
CTSD	4.21371	7.49245	21.7723	1.31836e-92	1.06323e-90	200.266
ABCA1	3.20591	2.95648	21.7586	1.66091e-92	1.33112e-90	200.035
HK2	3.30096	2.4097	21.6808	6.20577e-92	4.94264e-90	198.721
CYFIP1	3.62827	3.33414	21.5667	4.25962e-91	3.37167e-89	196.801
RASSF4	4.24383	4.60728	21.5498	5.66544e-91	4.42975e-89	196.517
ACY1	2.79451	1.1277	21.5408	6.5967e-91	5.12663e-89	196.365
BNIP3	3.571	1.77846	21.5227	8.94681e-91	6.91114e-89	196.061
ADAM9	3.59378	2.782	21.5219	9.06308e-91	6.95904e-89	196.048
NPL	3.81349	2.4905	21.4744	2.01765e-90	1.5309e-88	195.251
NEK6	3.95904	3.48989	21.3958	7.55597e-90	5.69942e-88	193.934
CD59	3.58282	2.18233	21.3504	1.61968e-89	1.21457e-87	193.174
SLC43A3	4.23554	4.33213	21.3389	1.96441e-89	1.46451e-87	192.982
CD63	3.99944	7.64543	21.2166	1.52197e-88	1.12811e-86	190.941
CSRP1	3.81394	3.23452	21.1997	2.01908e-88	1.48797e-86	190.659
NR1H3	3.58014	1.68099	21.174	3.09704e-88	2.26934e-86	190.233
NCF2	3.88041	5.17917	21.1373	5.71494e-88	4.16379e-86	189.622
MRPL17	3.39877	2.04086	21.0228	3.84799e-87	2.78773e-85	187.721
TLR2	3.34784	3.83084	21.0002	5.60411e-87	4.03717e-85	187.346
GALM	3.44535	2.2251	20.9854	7.16074e-87	5.10572e-85	187.102
FCGR1A	4.30158	4.04018	20.9853	7.16705e-87	5.10572e-85	187.101
C6orf211	3.26564	1.8199	20.9558	1.17119e-86	8.2973e-85	186.611
BCKDK	3.92911	3.65036	20.931	1.76649e-86	1.2446e-84	186.202
CD84	3.6723	3.09638	20.9023	2.84303e-86	1.99214e-84	185.727
ANXA2	3.78783	9.06776	20.7997	1.55156e-85	1.08129e-83	184.036
TMBIM1	3.6833	3.93656	20.7942	1.70003e-85	1.17835e-83	183.945
IFI30	2.89542	10.4445	20.7922	1.75743e-85	1.21159e-83	183.912
AFAP1	1.32552	0.359395	20.7696	2.551e-85	1.74928e-83	183.54
GPI	4.12784	6.07561	20.7241	5.39998e-85	3.6637e-83	182.793
CISD3	2.9146	1.51154	20.6761	1.19243e-84	8.04762e-83	182.003
CTSB	2.83544	11.0191	20.6477	1.90256e-84	1.2773e-82	181.537
LGALS1	4.00298	7.72199	20.64	2.15707e-84	1.44063e-82	181.412
SIRPA	2.70545	2.69018	20.5124	1.75215e-83	1.16414e-81	179.324
SCD	2.62041	1.42649	20.4984	2.20734e-83	1.45901e-81	179.094
ME1	2.37995	0.879274	20.4798	2.9915e-83	1.96718e-81	178.791
NPTN	3.31497	3.16949	20.4521	4.70405e-83	3.07755e-81	178.34
C1QB	5.43051	3.85878	20.4507	4.81299e-83	3.13284e-81	178.317
LINC00998	3.35435	2.09906	20.4053	1.01161e-82	6.55146e-81	177.577
PEPD	3.78917	2.84227	20.3614	2.07101e-82	1.3345e-80	176.863
TSFM	2.95723	1.46017	20.3109	4.71771e-82	3.02476e-80	176.042
FCGR2C	3.53737	3.47398	20.2476	1.32148e-81	8.43054e-80	175.016
SQRDL	4.02762	4.42952	20.1728	4.45729e-81	2.8295e-79	173.804
DOK2	3.91562	4.17183	20.1229	1.00036e-80	6.28807e-79	172.998
ASPH	3.56442	2.93253	20.1178	1.0868e-80	6.79805e-79	172.916
GAPDH	2.38387	10.9096	20.0862	1.81171e-80	1.12775e-78	172.406
UPP1	3.90614	4.44969	20.0844	1.86736e-80	1.15677e-78	172.376
C1orf54	3.69543	2.27416	20.0679	2.43819e-80	1.50312e-78	172.11
PRDX4	3.85074	2.86239	20.0598	2.77738e-80	1.70404e-78	171.98
NRP2	2.70511	1.47042	20.0586	2.83491e-80	1.73105e-78	171.96
OLFML2B	3.00729	1.42995	20.0507	3.21775e-80	1.9555e-78	171.834
AIF1	3.20639	7.60068	20.0474	3.39747e-80	2.05499e-78	171.78
SLC17A9	2.86573	1.54878	20.0329	4.29325e-80	2.58462e-78	171.546
NLN	2.22632	0.888809	20.009	6.31308e-80	3.78284e-78	171.162
ANXA1	3.8387	6.79782	19.9623	1.34159e-79	8.00151e-78	170.411
VKORC1	3.9656	3.62007	19.9549	1.51043e-79	8.96678e-78	170.293
FUCA2	3.42105	2.77076	19.9491	1.66095e-79	9.8149e-78	170.198
GNG10	3.72467	4.00627	19.9441	1.80043e-79	1.05903e-77	170.118
CREG1	3.86134	3.66301	19.9416	1.87444e-79	1.09753e-77	170.078
PPT1	3.85669	6.12191	19.9172	2.77469e-79	1.61727e-77	169.687
SERPINB6	3.74322	3.24	19.8999	3.66674e-79	2.12754e-77	169.409
CALU	3.405	2.69679	19.8845	4.69395e-79	2.71128e-77	169.163
NIT2	3.13465	1.96252	19.8438	9.03522e-79	5.19545e-77	168.51
LIMS1	3.53875	3.97533	19.7556	3.72066e-78	2.12991e-76	167.1
CPM	3.60061	2.51246	19.7281	5.77805e-78	3.2784e-76	166.661
CCR1	3.43249	2.94317	19.7221	6.36313e-78	3.59447e-76	166.565
PLEKHO2	3.22114	3.10825	19.7199	6.58842e-78	3.70541e-76	166.53
MRPL12	3.21409	2.13024	19.6684	1.50163e-77	8.40847e-76	165.709
TXNDC17	4.23153	3.36443	19.6584	1.7617e-77	9.77936e-76	165.55
DAB2	3.46542	2.62238	19.6535	1.9052e-77	1.05303e-75	165.472
TCEAL4	3.05803	1.81632	19.6387	2.41244e-77	1.32767e-75	165.237
SNX2	3.95035	4.63174	19.6049	4.13748e-77	2.26731e-75	164.699
FAM195A	2.51463	1.09085	19.5949	4.84941e-77	2.64613e-75	164.541
MAPK13	1.90105	0.663011	19.593	4.9967e-77	2.71494e-75	164.511
SIGLEC7	3.32317	2.32975	19.5638	7.95549e-77	4.30436e-75	164.048
MCM4	2.14984	0.796348	19.5461	1.05611e-76	5.69015e-75	163.765
TMEM51	2.53963	1.39412	19.5013	2.15196e-76	1.15459e-74	163.056
MAF	1.87605	0.981898	19.4997	2.20841e-76	1.17993e-74	163.03
LYZ	3.01207	8.85103	19.4812	2.96077e-76	1.57535e-74	162.738
FNDC3B	3.02882	2.72843	19.4809	2.97613e-76	1.57698e-74	162.733
DNPH1	3.79053	3.03163	19.4188	7.97335e-76	4.2075e-74	161.751
GTF3C1	2.90638	1.72761	19.3882	1.29365e-75	6.79854e-74	161.269
KCNN4	3.14369	1.94585	19.3823	1.42184e-75	7.44175e-74	161.174
P4HA1	3.58782	3.35551	19.3681	1.7799e-75	9.27789e-74	160.951
CECR5	3.29321	2.3368	19.3632	1.92284e-75	9.9824e-74	160.874
RP5-940J5.9	2.15272	9.84044	19.329	3.30259e-75	1.70762e-73	160.335
ECHS1	3.53781	3.45193	19.3195	3.83833e-75	1.97666e-73	160.185
DPYD	2.92955	3.56524	19.3107	4.41237e-75	2.26319e-73	160.046
CD9	4.27967	3.31553	19.1857	3.16306e-74	1.61593e-72	158.083
PDCD5	3.79934	3.05238	19.1774	3.60847e-74	1.83617e-72	157.952
MPP1	3.83271	4.24663	19.1711	3.98069e-74	2.01756e-72	157.854
IFI27L2	3.37003	2.4176	19.1547	5.15387e-74	2.60189e-72	157.597
AK4	2.32434	1.00686	19.1038	1.14574e-73	5.76148e-72	156.801
CRYL1	2.71859	1.41388	19.0911	1.3992e-73	7.00858e-72	156.602
MRPL15	3.44968	2.23533	19.0873	1.48331e-73	7.40095e-72	156.544
PLA2G15	3.13817	1.86454	19.071	1.91746e-73	9.53009e-72	156.288
LINC00116	3.18683	1.88936	19.04	3.11442e-73	1.54194e-71	155.804
QSOX1	3.18215	3.334	19.006	5.29837e-73	2.61312e-71	155.275
TSPAN14	3.38588	3.65091	18.9951	6.29203e-73	3.09129e-71	155.104
TRAP1	3.14336	2.11712	18.9752	8.57574e-73	4.1972e-71	154.795
ITGB2	2.51786	8.17154	18.964	1.02143e-72	4.98013e-71	154.621
EHD4	3.0072	2.65896	18.942	1.44106e-72	6.99953e-71	154.278
ATP6AP2	3.64096	6.00063	18.9292	1.75911e-72	8.5121e-71	154.079
S100A10	3.69662	8.66592	18.872	4.2928e-72	2.06942e-70	153.191
FOLR2	3.52697	1.66844	18.8587	5.27726e-72	2.53447e-70	152.985
SLC37A4	2.1766	0.876947	18.8553	5.56768e-72	2.66397e-70	152.931
CD82	3.78104	2.96108	18.8353	7.59283e-72	3.61944e-70	152.622
SLC39A1	3.58296	3.29076	18.829	8.37649e-72	3.97821e-70	152.524
C1orf122	2.16971	0.899516	18.7814	1.75496e-71	8.304e-70	151.788
SLC1A3	2.93154	1.723	18.7666	2.20677e-71	1.04035e-69	151.559
ADAM15	3.24579	2.56723	18.7544	2.66643e-71	1.25244e-69	151.371
TSPAN15	2.12995	0.793827	18.7195	4.57815e-71	2.14254e-69	150.832
FCHO2	2.29784	1.22962	18.713	5.06444e-71	2.3615e-69	150.732
MYC	2.28731	1.03593	18.688	7.46175e-71	3.46674e-69	150.346
HMGB3	2.01524	0.756657	18.6596	1.15738e-70	5.3578e-69	149.908
RP11-161H23.5	3.56263	3.20118	18.6521	1.30028e-70	5.99768e-69	149.792
FAM162A	3.43568	2.68128	18.6169	2.23644e-70	1.02788e-68	149.252
FTLP3	1.9496	5.47122	18.6146	2.3178e-70	1.06147e-68	149.216
PAPSS2	2.54676	1.48253	18.6109	2.45668e-70	1.12107e-68	149.158
LMNA	3.95865	4.05505	18.5966	3.0611e-70	1.39193e-68	148.939
SGK1	4.08823	5.38929	18.5815	3.86133e-70	1.74961e-68	148.708
PKM	2.38012	7.11363	18.5746	4.29616e-70	1.93978e-68	148.602
PLBD1	3.52962	3.33969	18.5201	9.94305e-70	4.45803e-68	147.766
GSTO1	3.76273	6.20529	18.5147	1.08013e-69	4.82594e-68	147.683
MATK	1.6261	0.539698	18.4768	1.93451e-69	8.61327e-68	147.102
UGP2	3.41806	3.19713	18.4674	2.23429e-69	9.91358e-68	146.959
OLR1	3.73299	3.61788	18.4246	4.3121e-69	1.90669e-67	146.304
SGPL1	2.97504	2.9136	18.4022	6.07615e-69	2.67747e-67	145.962
ALAS1	3.3031	2.44236	18.3934	6.9558e-69	3.0546e-67	145.828
RBPJ	3.44935	5.19028	18.3855	7.8472e-69	3.43429e-67	145.707
PLD3	3.77735	4.30391	18.3493	1.36461e-68	5.95184e-67	145.156
CSTA	3.22677	2.7267	18.3421	1.52366e-68	6.62302e-67	145.046
IDH1	3.37103	2.63559	18.3335	1.73626e-68	7.52165e-67	144.916
GSTT1	2.27871	0.915641	18.3232	2.03228e-68	8.77439e-67	144.759
RHBDD2	3.3202	2.54924	18.3039	2.72968e-68	1.17066e-66	144.466
CD44	2.96149	7.69138	18.2886	3.44631e-68	1.47307e-66	144.233
SPG21	3.49765	3.55119	18.2737	4.33039e-68	1.8448e-66	144.006
ANXA5	2.84919	7.74444	18.2661	4.85646e-68	2.06206e-66	143.892
SLC16A3	3.22635	3.96678	18.2499	6.22475e-68	2.63432e-66	143.644
CLEC11A	2.12417	1.0403	18.1963	1.40715e-67	5.93549e-66	142.832
ALDH3B1	2.90656	2.23559	18.1794	1.81786e-67	7.6178e-66	142.577
CD109	1.42344	0.632013	18.1484	2.91107e-67	1.21592e-65	142.108
RAB31	3.071	4.44461	18.0474	1.34446e-66	5.59739e-65	140.584
FPR3	3.31161	2.94483	18.0246	1.89904e-66	7.88071e-65	140.24
TTYH3	2.58018	2.62362	18.02	2.03345e-66	8.41126e-65	140.171
SLIRP	3.52056	3.071	17.9993	2.7802e-66	1.14264e-64	139.86
VDAC1	3.55186	5.12993	17.9927	3.07187e-66	1.25849e-64	139.761
CLIC4	2.88458	2.32849	17.9731	4.12909e-66	1.68622e-64	139.466
GPR84	3.41218	2.42904	17.955	5.42267e-66	2.20746e-64	139.194
GSN	3.67047	6.3058	17.942	6.59819e-66	2.67749e-64	138.999
ANO10	2.03613	0.955169	17.937	7.11877e-66	2.87962e-64	138.923
PDLIM7	3.21296	2.82871	17.9095	1.07558e-65	4.33716e-64	138.512
HPRT1	3.39473	2.67929	17.9065	1.12578e-65	4.52534e-64	138.467
SNX10	3.30647	3.3552	17.8484	2.6954e-65	1.0801e-63	137.597
SFXN1	2.47888	1.45672	17.8464	2.77974e-65	1.11042e-63	137.567
DMXL2	3.01004	3.00186	17.8345	3.32202e-65	1.32293e-63	137.389
CYBB	2.85349	6.25074	17.8257	3.79084e-65	1.50495e-63	137.258
EMP1	2.34629	1.43265	17.8084	4.91251e-65	1.94423e-63	136.999
S100A11	2.34453	9.77521	17.8035	5.28357e-65	2.08465e-63	136.927
TMEM176B	4.14815	3.61944	17.7627	9.73337e-65	3.82856e-63	136.318
CLEC4A	3.68313	3.64154	17.7409	1.34835e-64	5.28741e-63	135.994
CHID1	3.2062	2.30741	17.7239	1.7404e-64	6.80401e-63	135.739
LINC00963	2.90088	2.19663	17.7045	2.32262e-64	9.02514e-63	135.452
GBA	3.30929	2.92539	17.6954	2.66364e-64	1.0319e-62	135.316
AKIP1	2.62634	1.47177	17.6923	2.78849e-64	1.07701e-62	135.27
PLIN3	3.45897	3.9069	17.6818	3.25949e-64	1.25515e-62	135.115
TUBA1C	2.99358	3.69324	17.6562	4.77884e-64	1.8347e-62	134.733
COLGALT1	3.12014	5.14354	17.6408	6.01059e-64	2.30071e-62	134.505
GBGT1	2.67611	1.65696	17.5581	2.05513e-63	7.8265e-62	133.281
TK1	2.17021	0.805073	17.558	2.05687e-63	7.8265e-62	133.28
PNKD	3.1468	2.90846	17.5518	2.25682e-63	8.56191e-62	133.187
MAP1S	2.93704	2.29334	17.5315	3.05028e-63	1.1538e-61	132.887
CTSA	3.53291	5.52322	17.5066	4.41157e-63	1.66381e-61	132.52
RAB34	3.52403	3.08221	17.5059	4.45392e-63	1.67129e-61	132.51
FAM127A	2.95243	2.73727	17.5059	4.45746e-63	1.67129e-61	132.509
MTHFD1	2.81711	1.82028	17.5021	4.71012e-63	1.76087e-61	132.455
KIFC3	2.02743	1.03498	17.4958	5.17171e-63	1.92223e-61	132.361
LRRC25	3.36721	4.31897	17.4889	5.72699e-63	2.12246e-61	132.26
MTX1	2.92679	1.97193	17.4824	6.30953e-63	2.33162e-61	132.163
ANXA4	3.41282	3.28238	17.4715	7.40901e-63	2.73005e-61	132.003
COPS7A	3.15319	2.62141	17.4705	7.527e-63	2.76558e-61	131.988
AAED1	2.54571	2.34635	17.4176	1.64514e-62	6.02731e-61	131.209
TPD52L2	3.3049	3.6731	17.415	1.70831e-62	6.22318e-61	131.171
ICA1	1.73754	0.597207	17.3719	3.22834e-62	1.17272e-60	130.538
NDUFA8	3.06065	2.29101	17.371	3.26924e-62	1.18422e-60	130.525
GPR68	1.2	0.345913	17.2952	9.97353e-62	3.60255e-60	129.414
HK1	2.97883	3.26774	17.2813	1.22386e-61	4.4083e-60	129.21
P4HA2	2.047	0.83653	17.2761	1.32142e-61	4.74638e-60	129.134
TMEM106C	2.10811	0.795212	17.251	1.90735e-61	6.83182e-60	128.769
COQ2	2.57582	1.53218	17.2454	2.07125e-61	7.39823e-60	128.687
ATP2C1	2.67494	2.06634	17.1439	9.15305e-61	3.26027e-59	127.207
SCOC	2.59356	1.62615	17.1355	1.03437e-60	3.67418e-59	127.085
COA3	3.00919	2.04966	17.119	1.31716e-60	4.66573e-59	126.844
RTN3	3.23573	4.23225	17.0736	2.55033e-60	9.00905e-59	126.186
AKR1B1	3.14176	2.50641	17.0556	3.31372e-60	1.16736e-58	125.926
H2AFJ	2.77101	2.38127	17.0299	4.81851e-60	1.69282e-58	125.553
BOLA3	2.56189	1.48315	17.0201	5.55159e-60	1.94503e-58	125.412
PRDX3	3.44049	5.06111	17.0068	6.74116e-60	2.35536e-58	125.218
AIFM2	1.39585	0.527854	16.9931	8.22035e-60	2.86439e-58	125.021
KLHDC3	2.91716	2.40982	16.9898	8.62997e-60	2.99897e-58	124.973
SLC39A13	2.74663	1.75316	16.984	9.37677e-60	3.24968e-58	124.89
MLLT4	1.31382	0.531808	16.9796	9.99626e-60	3.45504e-58	124.826
ENO2	2.15431	0.945599	16.969	1.16669e-59	4.02164e-58	124.672
MRPS35	2.94293	2.23923	16.9581	1.36646e-59	4.69761e-58	124.515
PGAM1	3.4031	6.44588	16.9342	1.93196e-59	6.62392e-58	124.17
DPCD	2.1031	0.918005	16.9108	2.70856e-59	9.26184e-58	123.834
ASAH1	3.23234	5.99725	16.9067	2.87479e-59	9.80412e-58	123.774
HAUS4	2.9126	2.30881	16.8918	3.56639e-59	1.21305e-57	123.56
LAMTOR2	3.54067	4.29843	16.8626	5.44083e-59	1.84571e-57	123.139
OSCAR	2.61308	2.31315	16.8484	6.67563e-59	2.25862e-57	122.935
CNIH4	3.13544	3.01089	16.8202	1.00238e-58	3.3825e-57	122.531
SNX8	3.1921	2.51135	16.8194	1.01418e-58	3.41334e-57	122.519
ADAM10	2.92323	3.56447	16.8105	1.15334e-58	3.87153e-57	122.391
ITGA5	2.99469	3.2369	16.8048	1.2521e-58	4.19208e-57	122.309
BSCL2	2.92347	1.87902	16.7995	1.35108e-58	4.51168e-57	122.233
FCGBP	1.51823	0.491245	16.7895	1.55899e-58	5.19246e-57	122.091
FABP5	3.66447	4.00249	16.7875	1.60586e-58	5.33469e-57	122.061
ETHE1	3.15241	2.5619	16.7827	1.72025e-58	5.69994e-57	121.993
UBAC1	2.43984	1.52712	16.7775	1.85471e-58	6.12963e-57	121.918
DUSP23	3.09943	2.54033	16.7695	2.0791e-58	6.85354e-57	121.804
ATG7	3.13059	4.02487	16.7692	2.08907e-58	6.86877e-57	121.8
ATP6V1B2	3.16881	5.73402	16.7659	2.19144e-58	7.1869e-57	121.752
IFNGR2	2.98121	5.58268	16.7551	2.55831e-58	8.36868e-57	121.598
NAA20	3.46691	3.22458	16.7405	3.15608e-58	1.02717e-56	121.389
ENO1	2.46523	9.09452	16.738	3.26899e-58	1.06122e-56	121.354
CAPG	3.68879	7.34724	16.7262	3.87343e-58	1.25427e-56	121.185
VAMP3	3.16829	3.35928	16.7251	3.9388e-58	1.27222e-56	121.168
BNIP3L	3.25425	4.51741	16.7178	4.37297e-58	1.40891e-56	121.064
TMEM176A	3.42719	2.54278	16.6891	6.59931e-58	2.12088e-56	120.654
SLC11A2	2.8078	2.29822	16.6721	8.41179e-58	2.68988e-56	120.413
GPR34	2.53173	1.28909	16.6468	1.20948e-57	3.85801e-56	120.051
MRPL52	3.2075	2.67764	16.6426	1.28315e-57	4.08284e-56	119.992
NQO2	3.12734	2.55745	16.6213	1.74074e-57	5.52512e-56	119.689
CDK4	3.05465	2.35126	16.62	1.77273e-57	5.61276e-56	119.67
SOD2	3.33793	7.04302	16.5933	2.59563e-57	8.19797e-56	119.291
HCK	2.8633	5.86378	16.5751	3.36689e-57	1.06078e-55	119.032
SLC38A7	2.01178	1.06779	16.572	3.51976e-57	1.10622e-55	118.988
NME1	3.34704	3.16299	16.5625	4.02757e-57	1.26273e-55	118.853
NDUFC1	3.38253	3.27554	16.5616	4.08393e-57	1.27727e-55	118.84
MEA1	2.99424	2.72307	16.5324	6.18709e-57	1.93034e-55	118.426
MDH1	3.53395	4.4938	16.5221	7.16081e-57	2.22872e-55	118.281
TPI1	2.77515	8.69562	16.5122	8.25188e-57	2.56208e-55	118.139
SDHB	3.54773	4.81721	16.5045	9.20048e-57	2.8497e-55	118.031
WFS1	1.32496	0.449958	16.5007	9.71444e-57	3.00164e-55	117.977
TMEM173	3.25133	3.1069	16.488	1.16405e-56	3.58813e-55	117.797
MYEOV2	2.87551	1.96133	16.4856	1.20445e-56	3.70375e-55	117.763
ADAP2	2.93178	2.65796	16.4824	1.25951e-56	3.86381e-55	117.718
THEM6	1.56959	0.592346	16.4806	1.29206e-56	3.95419e-55	117.693
MINOS1	3.50494	4.93114	16.4677	1.55287e-56	4.74105e-55	117.51
FRMD4A	1.60344	0.737642	16.4627	1.66725e-56	5.07818e-55	117.439
PRDX1	3.34043	7.30175	16.4564	1.8213e-56	5.53425e-55	117.351
ST3GAL6	2.79904	2.06522	16.4448	2.14707e-56	6.50871e-55	117.187
TIMM8B	2.69516	2.38982	16.3934	4.45006e-56	1.34266e-54	116.462
GIMAP4	3.13347	2.88907	16.3917	4.55955e-56	1.37247e-54	116.438
CTSK	1.99818	0.698253	16.3812	5.29036e-56	1.58872e-54	116.29
CYB5A	2.59846	1.53132	16.3727	5.96024e-56	1.78571e-54	116.171
IL1RN	3.98539	4.19869	16.3371	9.85758e-56	2.94648e-54	115.67
AQP9	2.71912	2.32294	16.3301	1.08906e-55	3.24767e-54	115.571
PLXNA1	1.54198	0.893827	16.3185	1.28253e-55	3.81575e-54	115.408
TM6SF1	2.73399	1.95226	16.3138	1.36956e-55	4.06526e-54	115.343
ACOT2	1.96662	1.02097	16.3006	1.64928e-55	4.88423e-54	115.158
C9orf89	3.07166	2.86458	16.2831	2.11196e-55	6.24e-54	114.912
ZWINT	1.6758	0.589045	16.2814	2.16293e-55	6.37592e-54	114.888
SMS	2.97666	2.70747	16.2625	2.82041e-55	8.29499e-54	114.624
S100A4	3.55571	7.54045	16.2496	3.38364e-55	9.92869e-54	114.442
GNPTG	3.22732	4.11485	16.2494	3.39143e-55	9.92883e-54	114.44
ATP6V1F	3.48205	6.39505	16.2344	4.18971e-55	1.2238e-53	114.23
TBXAS1	3.04128	4.51914	16.2329	4.2815e-55	1.24776e-53	114.208
LAT2	3.22274	4.39848	16.2308	4.40901e-55	1.27911e-53	114.179
CISH	2.77303	1.85834	16.2138	5.59438e-55	1.61934e-53	113.942
MRPS15	2.90483	2.51004	16.2037	6.44896e-55	1.8625e-53	113.8
GDE1	2.62903	1.88683	16.1934	7.45034e-55	2.14687e-53	113.657
DBNDD2	2.73974	1.86288	16.1871	8.14197e-55	2.33567e-53	113.568
LAPTM5	1.46729	9.66429	16.1836	8.54475e-55	2.44575e-53	113.52
SMIM15	2.64174	1.90629	16.1786	9.16563e-55	2.61761e-53	113.45
BTF3L4	2.9313	3.2082	16.1588	1.21099e-54	3.45079e-53	113.173
SLC7A8	2.08239	1.01623	16.1545	1.2857e-54	3.65554e-53	113.113
MRPS2	2.38138	1.43381	16.1319	1.76464e-54	5.00618e-53	112.798
PRNP	3.13383	4.45673	16.1304	1.80039e-54	5.09633e-53	112.778
ILK	3.1756	4.26597	16.1247	1.94931e-54	5.50572e-53	112.699
ATP6V1H	3.1671	2.85537	16.1093	2.41959e-54	6.81898e-53	112.484
SNUPN	2.21666	1.20469	16.1007	2.72777e-54	7.67067e-53	112.365
AC002055.4	2.22202	1.43246	16.0975	2.85309e-54	8.00551e-53	112.32
NOP10	3.56903	5.09166	16.0897	3.1807e-54	8.90527e-53	112.212
UQCRC1	3.48907	6.19875	16.0788	3.70162e-54	1.03411e-52	112.061
CA11	1.53342	0.584982	16.0747	3.91913e-54	1.0925e-52	112.004
NDUFAB1	3.30419	3.60241	16.0714	4.10415e-54	1.1416e-52	111.958
DHRS4L2	2.47114	2.17683	16.041	6.27288e-54	1.74106e-52	111.536
PFKFB4	2.32064	1.3992	16.0371	6.62583e-54	1.83505e-52	111.481
TMEM70	2.91825	2.52281	16.0252	7.82326e-54	2.16202e-52	111.316
RNASE1	3.79141	2.23675	16.0157	8.92218e-54	2.46041e-52	111.185
NFAM1	2.34804	2.42302	16.0086	9.85185e-54	2.71095e-52	111.087
SDCBP	3.03862	6.62897	16.0072	1.00448e-53	2.75812e-52	111.067
IMP3	2.82247	2.35192	16.0057	1.02502e-53	2.8085e-52	111.047
MKNK1	3.02681	3.41825	15.9984	1.13443e-53	3.10165e-52	110.946
NDUFS3	3.29534	3.29803	15.9901	1.27449e-53	3.4772e-52	110.83
C19orf70	2.96645	2.86129	15.9769	1.53075e-53	4.16747e-52	110.648
NDUFB9	3.39895	4.14403	15.9747	1.57737e-53	4.28531e-52	110.618
MRPL13	2.80086	2.13363	15.9685	1.72102e-53	4.66569e-52	110.531
EDEM2	2.8099	2.42449	15.9501	2.2205e-53	6.00707e-52	110.278
TLR4	2.38331	1.98076	15.9481	2.28278e-53	6.16254e-52	110.25
FLVCR2	2.37485	1.64676	15.944	2.41723e-53	6.51179e-52	110.193
ALDOA	2.211	10.1406	15.9414	2.50497e-53	6.734e-52	110.158
MRPL27	2.82181	2.04322	15.9388	2.59672e-53	6.96606e-52	110.122
LGALS3BP	3.23727	2.74871	15.9221	3.27452e-53	8.76601e-52	109.891
DCTN2	3.27171	3.43047	15.9132	3.70568e-53	9.89956e-52	109.768
MFSD1	3.02964	5.99947	15.9099	3.87777e-53	1.03378e-51	109.723
SLC29A3	2.42864	1.65984	15.9005	4.41619e-53	1.17487e-51	109.593
HIBADH	2.07874	1.08977	15.8957	4.72201e-53	1.25363e-51	109.527
ZFP36L1	2.90855	7.51511	15.8852	5.45626e-53	1.44557e-51	109.383
STRA13	3.07182	2.55212	15.8761	6.18776e-53	1.63599e-51	109.258
CD81	2.79985	2.41276	15.8594	7.79369e-53	2.05635e-51	109.028
NINJ1	3.40985	5.70056	15.8551	8.27605e-53	2.17913e-51	108.968
ATIC	2.86073	2.17481	15.8493	8.95743e-53	2.35371e-51	108.889
HEXB	3.32081	5.92007	15.8276	1.21005e-52	3.1731e-51	108.59
BLOC1S1	3.26026	4.13993	15.8002	1.76546e-52	4.6201e-51	108.214
EPRS	2.48382	2.05518	15.799	1.79339e-52	4.68364e-51	108.199
UROD	2.90977	2.35973	15.782	2.26728e-52	5.90923e-51	107.965
PSD3	1.82254	0.858531	15.768	2.75082e-52	7.15493e-51	107.773
ATRAID	3.35114	3.74286	15.7642	2.89883e-52	7.52465e-51	107.721
C5AR1	2.45081	3.47004	15.7581	3.14913e-52	8.15784e-51	107.638
ASL	2.60154	1.98503	15.7159	5.62741e-52	1.45484e-50	107.06
STAB1	3.10679	3.40266	15.6879	8.25846e-52	2.13075e-50	106.679
GRHPR	2.87167	2.70194	15.6763	9.68933e-52	2.48991e-50	106.52
NCF4	2.95574	3.31946	15.6752	9.83005e-52	2.52102e-50	106.505
PPARD	2.19045	1.77935	15.6641	1.14474e-51	2.92995e-50	106.354
XIST	2.76432	2.8856	15.6639	1.14841e-51	2.93347e-50	106.351
RP11-383H13.1	1.1675	0.344909	15.6559	1.28139e-51	3.26666e-50	106.242
IMPDH1	2.6662	2.41905	15.6462	1.462e-51	3.71969e-50	106.11
SUCLG2	2.38801	1.78194	15.6285	1.86252e-51	4.72933e-50	105.869
CALHM2	2.79382	2.3425	15.6265	1.91439e-51	4.85144e-50	105.842
SEMA4B	1.53808	0.642098	15.6223	2.02848e-51	5.13043e-50	105.784
NDUFS5	3.41001	4.86949	15.6201	2.08939e-51	5.27405e-50	105.755
ALDH3A2	2.41523	1.67016	15.6144	2.25908e-51	5.6912e-50	105.677
RNF13	3.36005	4.62849	15.6131	2.30043e-51	5.784e-50	105.659
FH	2.5311	1.90852	15.6055	2.55048e-51	6.40015e-50	105.557
CD68	2.42623	8.22638	15.6052	2.56134e-51	6.41485e-50	105.552
SYPL1	2.9502	2.55394	15.6011	2.70966e-51	6.77309e-50	105.496
IL18	2.9105	2.50623	15.5949	2.94906e-51	7.35716e-50	105.412
SCCPDH	1.97897	1.13031	15.5913	3.09626e-51	7.70938e-50	105.364
TBC1D2	2.50511	2.1581	15.5873	3.27172e-51	8.13047e-50	105.309
ATP5I	3.4109	4.79414	15.5832	3.46038e-51	8.58267e-50	105.253
GNPDA1	2.85681	2.36359	15.5828	3.47568e-51	8.60399e-50	105.249
POLD1	2.31861	1.43867	15.5602	4.73449e-51	1.16976e-49	104.941
ARAP1	2.69723	3.99664	15.5594	4.78694e-51	1.18044e-49	104.93
COX7B	2.88551	4.04834	15.5517	5.3111e-51	1.30718e-49	104.827
FAM200B	2.39405	1.39451	15.5451	5.8162e-51	1.42876e-49	104.736
C5orf17	1.00337	0.291548	15.5153	8.72287e-51	2.13869e-49	104.333
PAICS	2.34469	1.71654	15.497	1.11792e-50	2.73571e-49	104.086
KIAA1715	1.902	1.2279	15.494	1.16546e-50	2.84662e-49	104.045
MIF	3.16684	6.87772	15.4879	1.2645e-50	3.08263e-49	103.963
CCL3L1	3.51134	2.69472	15.4872	1.2774e-50	3.10818e-49	103.953
DHRS4	2.73675	2.54196	15.4848	1.3206e-50	3.20721e-49	103.92
ACAT1	2.56365	1.93794	15.4433	2.3163e-50	5.61474e-49	103.361
SETD3	2.44664	2.08478	15.4431	2.32309e-50	5.62055e-49	103.358
SIL1	2.78298	2.63696	15.4416	2.36991e-50	5.72304e-49	103.338
COA6	2.5896	1.85534	15.4197	3.19054e-50	7.69029e-49	103.042
TNFRSF12A	2.03802	1.02316	15.4088	3.69699e-50	8.89427e-49	102.896
SDHD	2.81719	4.34481	15.4012	4.09548e-50	9.83452e-49	102.794
FAM213B	1.58395	0.692594	15.3745	5.87388e-50	1.40787e-48	102.435
UBL4A	1.81531	0.895586	15.3737	5.93833e-50	1.42066e-48	102.424
VAMP4	2.03185	1.16528	15.3736	5.95011e-50	1.42082e-48	102.422
FCGR1C	2.48015	2.1281	15.3573	7.41901e-50	1.76501e-48	102.203
KIAA0101	1.6084	0.596554	15.3443	8.83489e-50	2.09796e-48	102.029
APMAP	2.92114	3.26844	15.3368	9.77469e-50	2.31256e-48	101.928
S100A8	3.81379	4.13654	15.3347	1.00535e-49	2.37414e-48	101.9
MRPL43	2.86118	2.39191	15.334	1.01565e-49	2.39405e-48	101.89
ERO1L	2.50506	3.25631	15.3268	1.1189e-49	2.63259e-48	101.794
TMEM205	2.99804	2.65918	15.3209	1.21084e-49	2.84371e-48	101.715
RNF181	3.30357	4.68463	15.3169	1.27892e-49	2.9981e-48	101.661
PTPRO	2.01376	1.21628	15.3085	1.43175e-49	3.35025e-48	101.549
CXCL3	3.44084	2.5043	15.3063	1.47352e-49	3.4417e-48	101.52
LAIR1	3.23147	5.16299	15.2968	1.67519e-49	3.90564e-48	101.392
ATP5H	3.27755	4.9299	15.295	1.71614e-49	3.99385e-48	101.368
MRPL14	2.86998	2.61482	15.2872	1.90646e-49	4.42873e-48	101.264
SEPW1	3.18747	4.18258	15.2851	1.96081e-49	4.54674e-48	101.236
PPME1	2.09695	1.31465	15.28	2.09904e-49	4.85848e-48	101.168
CD33	3.14124	3.18416	15.2717	2.34692e-49	5.41269e-48	101.057
JOSD2	2.59892	2.10413	15.2359	3.79688e-49	8.741e-48	100.578
TYMS	1.59133	0.555466	15.2346	3.86676e-49	8.88593e-48	100.56
RMND1	1.73748	0.840036	15.2344	3.87447e-49	8.88771e-48	100.558
TEX264	2.9225	2.68891	15.2192	4.75321e-49	1.0884e-47	100.355
NDUFB2	3.25232	5.25032	15.2182	4.81514e-49	1.10062e-47	100.342
GIMAP6	2.03301	1.25782	15.2034	5.87116e-49	1.33961e-47	100.144
QPCT	2.70793	1.99704	15.195	6.56879e-49	1.49612e-47	100.033
COQ9	2.45053	1.58365	15.1932	6.73188e-49	1.53055e-47	100.008
AKR1A1	3.42276	5.27943	15.1916	6.87584e-49	1.56051e-47	99.9873
H2AFY2	1.43858	0.609613	15.1836	7.65053e-49	1.73326e-47	99.8811
TIAM1	1.85029	1.30141	15.1753	8.55602e-49	1.93499e-47	99.7698
BTF3L4P2	2.38807	2.08862	15.1691	9.28986e-49	2.09725e-47	99.6879
MRPL40	2.51307	1.87363	15.1639	9.95834e-49	2.24421e-47	99.6188
DUSP6	3.13076	3.58551	15.163	1.00764e-48	2.26684e-47	99.6071
NDUFB5	3.08032	3.62793	15.1618	1.02418e-48	2.30002e-47	99.5909
ANPEP	2.99411	3.74805	15.1373	1.42154e-48	3.18122e-47	99.2647
C1orf198	1.14246	0.405556	15.1154	1.90234e-48	4.24977e-47	98.9748
HAGHL	1.4345	0.606385	15.1132	1.96009e-48	4.37118e-47	98.9451
TNFSF13	3.30854	4.94232	15.1095	2.05807e-48	4.58172e-47	98.8965
MSN	2.14793	5.81661	15.1071	2.1273e-48	4.72761e-47	98.8636
P2RX4	2.7693	2.73834	15.1023	2.26745e-48	5.03036e-47	98.8001
RP11-1334A24.6	1.70791	1.1324	15.1021	2.27351e-48	5.0351e-47	98.7975
C7orf73	2.86166	3.4121	15.0828	2.93974e-48	6.48818e-47	98.5418
P2RY11	1.62805	0.844063	15.0812	3.00106e-48	6.61214e-47	98.5213
LDHA	2.77736	8.49381	15.0779	3.13538e-48	6.89623e-47	98.4777
NAGPA	2.4356	1.81317	15.035	5.54683e-48	1.21585e-46	97.9101
SNRPC	3.13577	3.45837	15.0333	5.67525e-48	1.24187e-46	97.8874
C1orf85	2.81456	2.3839	15.0312	5.83481e-48	1.27461e-46	97.8598
MTCH2	3.09769	3.47114	15.0138	7.35266e-48	1.60073e-46	97.6298
ILVBL	2.34373	1.58309	15.0053	8.22891e-48	1.78846e-46	97.5177
LRPAP1	2.92131	4.5356	15.0028	8.5053e-48	1.84541e-46	97.4849
TUBGCP2	2.91177	3.3695	14.9906	9.99928e-48	2.16224e-46	97.3239
CCT5	3.20611	4.58297	14.9849	1.07906e-47	2.32942e-46	97.2481
IARS2	2.09617	1.51709	14.9781	1.18018e-47	2.54344e-46	97.159
NFIC	2.03272	1.51909	14.9655	1.39475e-47	3.00082e-46	96.9928
NT5C3B	1.71969	0.751669	14.9627	1.44752e-47	3.10913e-46	96.9559
FAIM2	1.10902	0.283071	14.9586	1.52873e-47	3.27808e-46	96.9016
SDC4	2.25529	1.87617	14.9567	1.56788e-47	3.35641e-46	96.8764
SHMT2	2.56753	2.04312	14.9498	1.7165e-47	3.66844e-46	96.7863
SPINT1	2.1423	1.43155	14.9494	1.72704e-47	3.68483e-46	96.7802
ATP5O	3.14764	5.31877	14.9483	1.75214e-47	3.73217e-46	96.7659
RPL23AP7	1.71455	0.894722	14.9423	1.89597e-47	4.03185e-46	96.6874
NUDT19	2.23862	2.04823	14.9399	1.95647e-47	4.15361e-46	96.6562
GPD2	1.78083	1.14452	14.9348	2.09303e-47	4.43618e-46	96.589
AMPD3	2.02369	1.44277	14.9279	2.29239e-47	4.85072e-46	96.4985
NDUFB3	3.07208	4.49169	14.9214	2.49851e-47	5.27816e-46	96.4129
CLPB	2.17631	1.42916	14.9183	2.60241e-47	5.48859e-46	96.3723
PDK1	1.91812	1.24269	14.8909	3.7358e-47	7.86604e-46	96.0127
MFSD10	2.7434	2.84184	14.8827	4.16262e-47	8.75038e-46	95.9051
BLVRA	3.07101	3.84662	14.882	4.20318e-47	8.82118e-46	95.8954
UQCRC2	2.98854	4.2974	14.8651	5.25391e-47	1.09904e-45	95.6735
SCPEP1	3.1638	4.14265	14.8623	5.44503e-47	1.13716e-45	95.6379
FIS1	3.09318	3.64217	14.8547	6.02309e-47	1.25584e-45	95.5376
MRPS18C	2.75317	2.32563	14.8474	6.62567e-47	1.37924e-45	95.4427
TPI1P1	1.45628	2.07122	14.8468	6.68456e-47	1.38924e-45	95.4339
TRAPPC2L	2.79069	2.30797	14.8361	7.68885e-47	1.59537e-45	95.2947
UQCC2	2.56304	1.82888	14.8294	8.40417e-47	1.74098e-45	95.2062
UQCR10	2.93817	4.63266	14.8228	9.16136e-47	1.89478e-45	95.1204
ABR	2.48102	2.77105	14.8129	1.04352e-46	2.15477e-45	94.9909
MRPL34	2.75554	2.53932	14.8126	1.04757e-46	2.15964e-45	94.987
KXD1	2.77559	3.47567	14.8105	1.07708e-46	2.21692e-45	94.9594
PLOD3	2.58088	2.17702	14.8085	1.10475e-46	2.27023e-45	94.9341
IGSF6	3.28493	5.41166	14.807	1.12682e-46	2.31187e-45	94.9145
ZFYVE21	2.13347	1.22762	14.7979	1.2699e-46	2.60127e-45	94.7956
TMEM126A	2.27672	1.37445	14.7959	1.30351e-46	2.66586e-45	94.7696
PSTPIP1	2.84988	2.7225	14.795	1.3193e-46	2.69385e-45	94.7576
SLC25A39	2.98697	3.64929	14.7896	1.41661e-46	2.88794e-45	94.6868
COMMD9	2.95337	3.47442	14.7888	1.43177e-46	2.91422e-45	94.6762
WBP5	2.1835	1.28101	14.7787	1.63476e-46	3.32212e-45	94.5443
HMOX1	2.79896	2.88469	14.7752	1.71093e-46	3.47139e-45	94.499
TOMM5	2.89721	2.96141	14.7742	1.73369e-46	3.51203e-45	94.4859
MRTO4	1.71261	1.00439	14.7739	1.74012e-46	3.51948e-45	94.4822
ABCG1	2.15684	1.78151	14.7697	1.83902e-46	3.71367e-45	94.4272
SLC25A11	2.83719	3.07143	14.7603	2.07968e-46	4.19304e-45	94.3049
ALG3	2.64559	2.18612	14.7513	2.33972e-46	4.70993e-45	94.1877
IL10RB	2.86995	3.54939	14.7449	2.54334e-46	5.1118e-45	94.1047
MYO1C	1.81135	1.12328	14.7411	2.67522e-46	5.36844e-45	94.0544
ACTL6A	2.29247	1.46909	14.7394	2.73564e-46	5.48112e-45	94.0322
DUSP3	2.52313	2.75285	14.7305	3.07155e-46	6.14454e-45	93.917
CUTA	2.99471	3.34778	14.7283	3.16109e-46	6.3138e-45	93.8884
OLA1	2.69199	2.71499	14.7229	3.3934e-46	6.76728e-45	93.8179
SLC35F6	2.56427	3.98866	14.7204	3.50585e-46	6.98068e-45	93.7854
SUCLG1	2.80293	3.09573	14.7201	3.52104e-46	7.00004e-45	93.7811
ATOX1	3.09211	3.68623	14.7157	3.72641e-46	7.39687e-45	93.7247
HBEGF	2.96721	3.6307	14.7019	4.46525e-46	8.84975e-45	93.5448
IFT122	1.48578	0.647999	14.7013	4.50232e-46	8.90945e-45	93.5366
FARP1	1.27558	0.493035	14.6975	4.72641e-46	9.33848e-45	93.4883
PIGT	2.82814	3.16837	14.6713	6.65689e-46	1.31325e-44	93.1476
GYG1	2.62421	2.2525	14.6652	7.20783e-46	1.41975e-44	93.0685
TCEAL8	2.30845	1.5905	14.6616	7.5557e-46	1.48599e-44	93.0217
DDX41	2.55225	2.04769	14.6417	9.79416e-46	1.92328e-44	92.7636
MRPS26	2.31643	1.60436	14.6404	9.95623e-46	1.95212e-44	92.7472
MPI	2.10032	1.22013	14.6357	1.05779e-45	2.07086e-44	92.687
AHCY	2.58639	2.55568	14.63	1.1406e-45	2.22957e-44	92.612
TLR8	1.77718	1.15157	14.6254	1.21086e-45	2.36329e-44	92.5526
KDELR1	2.40771	3.18771	14.6188	1.3189e-45	2.57025e-44	92.4676
FRMD4B	2.40668	2.06674	14.6116	1.44849e-45	2.81851e-44	92.3743
NCK1	2.34492	1.80026	14.6039	1.60044e-45	3.10947e-44	92.2751
ANKH	1.63486	0.967304	14.6025	1.63076e-45	3.16358e-44	92.2565
AP2S1	2.95433	5.91102	14.5831	2.09772e-45	4.0633e-44	92.006
PDZD11	2.31933	1.60641	14.5745	2.34364e-45	4.53281e-44	91.8958
TMEM106B	1.72648	0.854692	14.5653	2.64338e-45	5.10483e-44	91.7761
MRP63	2.02113	2.04181	14.5642	2.67923e-45	5.16629e-44	91.7627
ATP6V0E2	1.81543	0.924033	14.5613	2.78233e-45	5.35702e-44	91.7251
PSMC1	2.87115	3.72623	14.5487	3.27482e-45	6.29581e-44	91.563
SLA	2.76121	3.61881	14.5388	3.7251e-45	7.15075e-44	91.4349
SLC48A1	1.57907	0.83578	14.5364	3.84377e-45	7.36751e-44	91.4037
EXOSC4	2.40116	1.61738	14.5357	3.87564e-45	7.41751e-44	91.3955
SFXN4	2.08157	1.21545	14.5207	4.70474e-45	8.99089e-44	91.2027
IGFBP4	1.04559	0.348507	14.5077	5.5681e-45	1.0625e-43	91.0351
ZNF438	1.57439	0.880012	14.5046	5.79523e-45	1.10419e-43	90.9953
NDUFB6	2.68295	3.41623	14.5005	6.10933e-45	1.16231e-43	90.9428
RP11-124N14.3	1.7904	3.04751	14.4942	6.63136e-45	1.25976e-43	90.8613
CA2	2.06431	1.15843	14.4795	8.01844e-45	1.52101e-43	90.6724
SLC36A1	1.80391	1.09859	14.4713	8.91356e-45	1.68582e-43	90.5672
GMNN	1.75607	0.84705	14.4597	1.0355e-44	1.95555e-43	90.4181
GK	2.65928	4.04484	14.4543	1.10999e-44	2.09314e-43	90.349
IMMT	2.47708	2.37776	14.445	1.25054e-44	2.35473e-43	90.2304
TMEM251	2.2059	1.27969	14.4414	1.31076e-44	2.4645e-43	90.1836
VPS26A	2.68279	3.28169	14.4368	1.39036e-44	2.61033e-43	90.125
MGAT4A	2.69268	2.95593	14.4052	2.08833e-44	3.90929e-43	89.7204
MARCKS	2.10237	2.68934	14.3983	2.28266e-44	4.26685e-43	89.632
COMMD4	2.52136	1.86967	14.3941	2.40957e-44	4.49751e-43	89.5782
ABHD2	2.5538	2.85135	14.3912	2.50057e-44	4.66058e-43	89.5413
METTL1	1.96799	0.995435	14.385	2.70615e-44	5.03642e-43	89.4627
PTTG1IP	2.67472	5.40829	14.3843	2.73003e-44	5.07351e-43	89.454
LTA4H	3.09626	4.66622	14.3803	2.87553e-44	5.33618e-43	89.4023
BST1	2.54203	2.08591	14.3782	2.95379e-44	5.47347e-43	89.3756
KANSL1-AS1	1.90236	0.953936	14.3706	3.25833e-44	6.02909e-43	89.2781
ATP6V1D	2.77315	2.49483	14.3673	3.39994e-44	6.28204e-43	89.2357
COMT	3.08018	4.94297	14.3579	3.8329e-44	7.06167e-43	89.1165
AQP3	1.75953	0.805683	14.3425	4.66755e-44	8.58708e-43	88.9206
USMG5	3.3016	4.83401	14.339	4.88549e-44	8.97516e-43	88.8752
DEGS1	2.62253	3.77856	14.3288	5.56892e-44	1.02015e-42	88.745
RPS27L	2.87907	3.56782	14.3256	5.8026e-44	1.05992e-42	88.7042
LGALS8	2.72299	3.13958	14.3161	6.55155e-44	1.19333e-42	88.5834
GNS	2.48801	4.64291	14.3119	6.91053e-44	1.25693e-42	88.5304
CDKN2A	1.1926	0.407092	14.3099	7.08997e-44	1.28774e-42	88.5049
AP1B1	2.42805	3.91528	14.3079	7.27815e-44	1.32005e-42	88.4788
HDDC2	2.0936	1.2369	14.3059	7.46634e-44	1.35227e-42	88.4535
CTNNA1	2.7076	3.95538	14.2972	8.33928e-44	1.50824e-42	88.3435
DARS	2.8843	3.96692	14.2948	8.60199e-44	1.55357e-42	88.3127
TMEM261	2.17442	1.76183	14.2896	9.18687e-44	1.65454e-42	88.2472
MLX	2.72846	3.42956	14.268	1.21153e-43	2.17889e-42	87.9721
NDUFB1	3.01278	3.52127	14.2674	1.22012e-43	2.19127e-42	87.9651
CDK5	1.99688	1.26958	14.2622	1.30423e-43	2.33905e-42	87.8988
ADH5	2.47861	2.05322	14.2605	1.33334e-43	2.3879e-42	87.8768
ATPIF1	3.0475	3.27272	14.2588	1.36133e-43	2.43464e-42	87.8562
CDA	2.06812	1.05444	14.2578	1.38007e-43	2.46471e-42	87.8426
AC004797.1	2.3321	2.58429	14.2561	1.4097e-43	2.51413e-42	87.8215
CCDC124	2.45189	2.39392	14.2348	1.84986e-43	3.28542e-42	87.5512
ACOT1	1.01643	0.475852	14.22	2.23331e-43	3.96096e-42	87.3639
PCCB	2.2325	1.90958	14.2114	2.49119e-43	4.40148e-42	87.2553
TMCO3	1.5787	0.813791	14.2114	2.49198e-43	4.40148e-42	87.255
YIF1A	2.80694	2.9544	14.2037	2.74702e-43	4.84526e-42	87.1581
RCHY1	2.01755	1.13499	14.1932	3.14251e-43	5.52763e-42	87.0243
FKBP15	2.35568	2.85171	14.1846	3.50272e-43	6.15278e-42	86.9164
TIMM50	2.49387	2.19931	14.169	4.27195e-43	7.49373e-42	86.719
TWF2	2.87753	5.10114	14.1584	4.88873e-43	8.56395e-42	86.5849
SMIM4	1.85757	1.10823	14.1402	6.15719e-43	1.07713e-41	86.3555
PGRMC1	2.11612	1.37658	14.139	6.2462e-43	1.09121e-41	86.3413
TRAPPC5	2.9035	4.42578	14.1385	6.28934e-43	1.09726e-41	86.3344
ATP5J	2.97152	4.39722	14.1379	6.34016e-43	1.10462e-41	86.3264
SORBS3	1.79346	1.21548	14.1321	6.82376e-43	1.18726e-41	86.2533
IFRD2	2.48245	1.96307	14.131	6.91511e-43	1.20152e-41	86.2401
MSC	1.07058	0.338319	14.13	7.00337e-43	1.21521e-41	86.2275
ADPRHL2	2.34417	1.88068	14.1289	7.10125e-43	1.23053e-41	86.2137
GGCT	2.30735	1.68707	14.1243	7.52575e-43	1.30233e-41	86.156
PLD1	1.70424	0.896657	14.1208	7.87334e-43	1.36064e-41	86.1111
ADAMTSL4	1.89591	1.89688	14.1173	8.22118e-43	1.41885e-41	86.0681
BCL2L1	2.03666	1.73762	14.1144	8.53658e-43	1.4713e-41	86.0306
SLC25A40	1.92846	1.288	14.1127	8.71923e-43	1.50076e-41	86.0096
HADHB	2.78699	4.46674	14.1123	8.76775e-43	1.50709e-41	86.0041
EPAS1	1.55589	0.821258	14.1092	9.11168e-43	1.56411e-41	85.9658
CMAS	2.01078	1.26446	14.0968	1.066e-42	1.82745e-41	85.8098
CLTA	3.02571	5.40559	14.0837	1.25754e-42	2.15293e-41	85.6455
TNFRSF1A	2.62933	4.56741	14.0816	1.29242e-42	2.20969e-41	85.6183
C3orf14	1.42329	0.541741	14.0812	1.29815e-42	2.21605e-41	85.6139
CD300LF	2.51884	2.14222	14.0811	1.2996e-42	2.21605e-41	85.6128
UQCRFS1	2.76671	4.33389	14.0795	1.32713e-42	2.26e-41	85.5919
SORD	1.66155	1.0007	14.0765	1.37734e-42	2.34239e-41	85.555
GBAS	2.48425	2.62055	14.0753	1.39941e-42	2.37677e-41	85.5392
VDAC2	2.84191	5.07985	14.0727	1.44608e-42	2.45278e-41	85.5066
NDUFB10	3.00274	3.63345	14.0711	1.47546e-42	2.49931e-41	85.4866
FCGR1B	2.57889	2.80398	14.069	1.51414e-42	2.56145e-41	85.4608
ITGB1	2.53152	4.00375	14.0639	1.61478e-42	2.72811e-41	85.3969
PFDN1	2.85662	3.55159	14.0518	1.88343e-42	3.17779e-41	85.2439
APIP	2.34713	2.08164	14.0509	1.90393e-42	3.20816e-41	85.2331
ETV5	1.98754	1.42692	14.0505	1.91278e-42	3.21884e-41	85.2285
ASNA1	2.29757	2.29482	14.048	1.9736e-42	3.31683e-41	85.1974
TMEM147	2.97532	3.46697	14.0416	2.14123e-42	3.59384e-41	85.1163
CLEC4E	2.68503	2.25126	14.0394	2.2018e-42	3.68587e-41	85.0886
UTP18	2.52905	2.28645	14.0383	2.23236e-42	3.72784e-41	85.0749
SLC29A1	2.30612	1.90966	14.0383	2.23269e-42	3.72784e-41	85.0747
PSMC5	3.00153	4.50206	14.0368	2.27294e-42	3.79011e-41	85.057
TIMM10	2.60538	2.14718	14.0362	2.2914e-42	3.81592e-41	85.0489
PET112	1.82689	1.07601	14.0345	2.34212e-42	3.89533e-41	85.0271
TRAF7	1.9165	1.76267	14.0312	2.4405e-42	4.05369e-41	84.9862
DHCR24	1.16175	0.473688	14.0123	3.09732e-42	5.13803e-41	84.7493
VIM	1.88102	10.2511	14.0095	3.20712e-42	5.3133e-41	84.7146
MRPL54	2.53791	2.288	14.0026	3.49742e-42	5.77187e-41	84.6285
ARHGAP10	1.73757	1.25007	14.0009	3.57258e-42	5.88833e-41	84.6073
SLC43A1	1.19532	0.444891	13.9976	3.72417e-42	6.13029e-41	84.566
F13A1	2.9538	2.88111	13.9875	4.23158e-42	6.95662e-41	84.439
MRPL24	2.45355	2.26063	13.9862	4.30053e-42	7.05187e-41	84.423
MAPKAPK3	2.69451	3.66181	13.9829	4.48144e-42	7.33914e-41	84.382
HSPA7	2.22595	2.00767	13.9668	5.48729e-42	8.97494e-41	84.1807
HSPB1	3.13187	4.85287	13.9601	5.96724e-42	9.74751e-41	84.0973
SUMF1	2.37225	2.21419	13.9551	6.35105e-42	1.03613e-40	84.0353
FBXL5	2.6206	3.82119	13.9471	7.02732e-42	1.145e-40	83.9347
SPI1	1.88994	2.99948	13.9326	8.42986e-42	1.37178e-40	83.7538
GALE	1.8983	1.01452	13.9311	8.58525e-42	1.39529e-40	83.7357
TPGS2	2.33061	1.79695	13.9254	9.22372e-42	1.49716e-40	83.6644
FAM136A	2.22501	1.72891	13.9228	9.52751e-42	1.54452e-40	83.6321
ID3	2.13049	1.27567	13.9185	1.00574e-41	1.62836e-40	83.5783
MRPS34	2.81561	3.30782	13.9183	1.00805e-41	1.63004e-40	83.576
TMED3	2.65884	2.72349	13.9149	1.05173e-41	1.69852e-40	83.5339
CCL4	3.69205	3.37165	13.9132	1.07431e-41	1.73281e-40	83.5128
GNAI3	2.49965	3.2603	13.9106	1.10949e-41	1.78732e-40	83.4807
MRPL11	2.40839	2.01235	13.9069	1.16177e-41	1.86917e-40	83.435
ATP6AP1	2.68985	5.60475	13.9044	1.19926e-41	1.92708e-40	83.4034
ARAP1-AS1	2.58153	3.26536	13.9042	1.2021e-41	1.92923e-40	83.401
SYT11	1.52104	0.981935	13.8971	1.3146e-41	2.10714e-40	83.3121
MPV17	3.02105	3.66453	13.8909	1.42054e-41	2.2741e-40	83.235
RBMS1	2.3198	2.16316	13.8807	1.61211e-41	2.57757e-40	83.1093
ENPP4	1.41702	0.807449	13.8769	1.69177e-41	2.70157e-40	83.0613
ERLIN1	1.64092	1.04218	13.858	2.1421e-41	3.41643e-40	82.8267
CCL4L1	3.22892	3.08864	13.8565	2.18165e-41	3.4752e-40	82.8085
ENOPH1	2.24326	1.73343	13.8553	2.21543e-41	3.52462e-40	82.7932
WDR83OS	2.97789	4.76729	13.8429	2.58509e-41	4.10764e-40	82.6398
DYNLL1	3.06342	4.95536	13.8422	2.60831e-41	4.1394e-40	82.6309
PSAP	1.35425	10.4259	13.8349	2.85638e-41	4.52749e-40	82.5406
CAPZA2	2.8166	5.68084	13.8328	2.9334e-41	4.63809e-40	82.5142
CD274	2.02028	1.18102	13.8317	2.97202e-41	4.69337e-40	82.5012
MRPS7	2.74011	3.02505	13.8281	3.10848e-41	4.90283e-40	82.4565
LPAR5	1.35472	0.646548	13.8256	3.20833e-41	5.05411e-40	82.4251
TOM1	2.63254	3.64554	13.8154	3.64377e-41	5.73302e-40	82.2986
DCTPP1	2.39319	2.08527	13.8143	3.69255e-41	5.80264e-40	82.2854
EBNA1BP2	2.33472	1.91797	13.814	3.70608e-41	5.81678e-40	82.2817
EXOSC7	2.35715	1.88271	13.7923	4.8554e-41	7.61135e-40	82.0132
DNAJC25	1.87326	1.65299	13.7913	4.91457e-41	7.69469e-40	82.0012
NECAP2	2.67561	4.38717	13.7895	5.02809e-41	7.86283e-40	81.9785
PIK3IP1	1.88699	1.10035	13.7886	5.07965e-41	7.93378e-40	81.9683
LIPA	2.8763	4.16317	13.7878	5.13229e-41	8.00624e-40	81.9581
RAB20	2.81702	3.45859	13.7705	6.36206e-41	9.91259e-40	81.7446
PSMB5	2.85222	3.00064	13.7625	7.02934e-41	1.0939e-39	81.6454
CHMP3	2.74236	3.07663	13.7587	7.37048e-41	1.1456e-39	81.5983
GOLIM4	1.82077	2.72686	13.7551	7.70453e-41	1.19462e-39	81.5542
PGD	2.91886	5.15268	13.7387	9.44718e-41	1.46306e-39	81.3515
SNAPC2	1.90735	1.27205	13.7292	1.06209e-40	1.64284e-39	81.2351
CYBRD1	1.78498	1.04745	13.7175	1.22765e-40	1.89665e-39	81.0911
CTSH	2.87336	7.35078	13.7068	1.40129e-40	2.16231e-39	80.9596
SLC39A11	2.41875	3.10463	13.7054	1.42661e-40	2.19873e-39	80.9418
CD40	2.73389	3.2788	13.7039	1.4529e-40	2.23656e-39	80.9237
CLPP	2.46934	2.23952	13.6982	1.55981e-40	2.39825e-39	80.8531
SCP2	2.85148	4.45984	13.689	1.74763e-40	2.6806e-39	80.7401
GADD45GIP1	2.42084	2.42348	13.6829	1.884e-40	2.88633e-39	80.6654
PNPO	1.92295	1.42262	13.6824	1.89577e-40	2.90089e-39	80.6592
DYNLT3	1.98625	1.34837	13.6811	1.92524e-40	2.94247e-39	80.6439
SPPL2A	2.78855	3.2093	13.6681	2.2613e-40	3.45198e-39	80.4839
DCUN1D5	2.09484	1.5169	13.6614	2.45526e-40	3.73916e-39	80.4022
COX8A	2.74065	6.87375	13.6568	2.59837e-40	3.95241e-39	80.3458
SLC25A24	1.96017	1.73549	13.6464	2.95563e-40	4.48521e-39	80.2178
PTPMT1	2.68775	2.80937	13.6418	3.12601e-40	4.73817e-39	80.1621
ORMDL2	2.79813	2.82755	13.6385	3.25942e-40	4.93454e-39	80.1205
CCNB2	1.27191	0.468295	13.6325	3.50855e-40	5.30544e-39	80.0473
CARD9	2.27253	1.96523	13.6284	3.69143e-40	5.57541e-39	79.9968
MPHOSPH6	2.46808	2.21259	13.625	3.8452e-40	5.80083e-39	79.9563
LHFPL2	2.06201	1.87122	13.6235	3.92072e-40	5.90781e-39	79.9369
TPMT	2.05698	2.26508	13.612	4.51557e-40	6.79615e-39	79.7965
LILRA6	2.14157	4.35676	13.6111	4.56547e-40	6.8632e-39	79.7856
C1orf123	2.16749	1.61236	13.5998	5.24313e-40	7.87267e-39	79.648
SEPN1	1.04238	0.528398	13.5974	5.40357e-40	8.10409e-39	79.6181
C15orf48	3.33735	4.29696	13.5924	5.74495e-40	8.60602e-39	79.5572
GLRX2	1.81096	1.01418	13.5862	6.1975e-40	9.27311e-39	79.4818
PVT1	1.54969	0.886717	13.5844	6.34105e-40	9.47684e-39	79.4591
FAM20A	1.74646	1.15418	13.576	7.02427e-40	1.04857e-38	79.3574
FKBP4	2.39206	2.2938	13.5742	7.18882e-40	1.07189e-38	79.3344
MMAB	1.50565	0.711336	13.5692	7.64268e-40	1.13824e-38	79.2735
MAN2B2	1.93209	2.00928	13.5661	7.93298e-40	1.1801e-38	79.2365
CKLF	2.86599	4.11626	13.5629	8.24989e-40	1.22528e-38	79.1975
C20orf27	2.3004	2.83279	13.5629	8.25584e-40	1.22528e-38	79.1968
GIMAP5	2.16122	1.68222	13.5599	8.56222e-40	1.26929e-38	79.1606
NDUFB7	2.91987	4.06879	13.5573	8.84522e-40	1.30822e-38	79.1283
GPAA1	2.62305	3.18441	13.5554	9.04583e-40	1.33634e-38	79.106
FCER1G	2.08696	10.4372	13.5424	1.06085e-39	1.5654e-38	78.9476
RDH11	2.39826	2.75724	13.5416	1.07171e-39	1.5796e-38	78.9375
CDK1	1.48496	0.584008	13.5398	1.09571e-39	1.61312e-38	78.9155
ZCCHC17	2.24474	1.78267	13.5396	1.09861e-39	1.61553e-38	78.9128
JUP	1.74002	1.17826	13.5285	1.25875e-39	1.84891e-38	78.7776
TRUB2	1.75922	1.01661	13.52	1.39584e-39	2.04792e-38	78.6748
PSMG1	2.07669	1.26553	13.5106	1.56597e-39	2.29491e-38	78.5605
CCL4L2	2.91036	2.46426	13.5078	1.62072e-39	2.37243e-38	78.5264
ANAPC11	2.94295	4.74637	13.5022	1.7356e-39	2.53769e-38	78.4583
SEMA4D	2.12751	2.26026	13.4977	1.8348e-39	2.67968e-38	78.4031
CTNND1	2.66718	4.18184	13.4869	2.09264e-39	3.04725e-38	78.2724
ATP6V1C1	2.42565	2.63151	13.4869	2.0936e-39	3.04725e-38	78.2719
SLC16A1	1.33909	0.772793	13.4831	2.19209e-39	3.18699e-38	78.2263
FUT11	1.53468	0.948585	13.4798	2.28315e-39	3.31561e-38	78.1858
TMX2	2.54132	2.48437	13.4796	2.28698e-39	3.31741e-38	78.1841
MKKS	2.27116	2.23339	13.4762	2.38368e-39	3.45378e-38	78.143
SPRYD3	1.9889	1.54464	13.4564	3.03666e-39	4.39493e-38	77.9024
COX5B	2.70941	6.04833	13.4539	3.13109e-39	4.52649e-38	77.8719
DERA	2.19098	1.75451	13.4487	3.33581e-39	4.81702e-38	77.809
RRM1	1.79941	1.10797	13.4406	3.68087e-39	5.30931e-38	77.7112
UFSP2	2.05422	1.44429	13.4243	4.48812e-39	6.45917e-38	77.5141
TSG101	2.82884	3.17872	13.4011	5.95548e-39	8.55175e-38	77.233
NDUFS4	2.58879	2.45316	13.3903	6.79173e-39	9.74165e-38	77.1024
SPTLC1	2.26958	2.14625	13.3809	7.6119e-39	1.09059e-37	76.9891
MRPL37	2.41007	2.45801	13.3761	8.06171e-39	1.15246e-37	76.932
C21orf33	2.47255	3.84696	13.374	8.27584e-39	1.18175e-37	76.906
ARL2	2.44981	2.48849	13.3645	9.2786e-39	1.32346e-37	76.7923
DPM3	2.108	1.48906	13.3639	9.35636e-39	1.33307e-37	76.784
CLIP4	1.7477	1.13668	13.3599	9.81368e-39	1.39668e-37	76.7366
RRM2	1.26221	0.403096	13.3582	1.00262e-38	1.42534e-37	76.7153
FAM195B	2.44193	2.78174	13.3529	1.06851e-38	1.51733e-37	76.6521
NDUFA6	2.704	4.30392	13.3348	1.33087e-38	1.8878e-37	76.4339
RAB14	1.76755	1.98055	13.3237	1.52198e-38	2.15651e-37	76.3005
CBR1	2.53027	2.6679	13.3226	1.54149e-38	2.18174e-37	76.2879
BIRC5	1.09888	0.352328	13.3206	1.57926e-38	2.23272e-37	76.2638
SOAT1	2.35718	2.98459	13.3176	1.6384e-38	2.31378e-37	76.2273
UQCRB	2.7276	5.15833	13.3127	1.73736e-38	2.44815e-37	76.169
RPS19BP1	2.62772	3.15271	13.3077	1.8456e-38	2.59782e-37	76.109
SPATA20	1.99452	1.62831	13.296	2.12678e-38	2.99032e-37	75.9681
MRPL23	2.21288	1.62519	13.2941	2.17686e-38	3.05738e-37	75.9449
SIGMAR1	2.18835	1.75771	13.2915	2.24684e-38	3.15221e-37	75.9135
DTNB	1.44895	0.705212	13.2841	2.45688e-38	3.44312e-37	75.8247
WDR11	2.11699	1.92596	13.274	2.77253e-38	3.88125e-37	75.7046
CTSC	2.76635	6.63549	13.2708	2.88285e-38	4.03127e-37	75.6658
RP11-108M9.4	1.98543	1.20747	13.2661	3.05272e-38	4.26417e-37	75.6089
TBRG4	2.20366	1.8668	13.2648	3.09953e-38	4.32483e-37	75.5938
ATP5G1	2.77916	3.50137	13.2483	3.78035e-38	5.26907e-37	75.3965
DDT	2.60357	3.36133	13.236	4.3835e-38	6.09649e-37	75.2494
EOGT	1.34759	0.652521	13.232	4.6021e-38	6.38666e-37	75.201
CYC1	2.78249	5.06583	13.2275	4.85617e-38	6.73196e-37	75.1476
YWHAH	2.14376	2.01647	13.2268	4.90058e-38	6.7862e-37	75.1386
VDAC3	2.75588	3.72073	13.2224	5.16628e-38	7.1464e-37	75.0861
ARL2BP	2.01575	1.44515	13.2219	5.19304e-38	7.17568e-37	75.081
RFC2	2.00323	1.42366	13.2164	5.54983e-38	7.66044e-37	75.015
PGK1	2.26574	8.90766	13.2148	5.65726e-38	7.80033e-37	74.9959
COX5A	2.9944	6.15297	13.2129	5.78914e-38	7.9736e-37	74.973
PC	1.21724	0.563942	13.2079	6.14412e-38	8.45344e-37	74.9139
TCEB2	2.60075	5.42643	13.1994	6.804e-38	9.3413e-37	74.8125
GALK1	2.51982	2.33992	13.1873	7.86937e-38	1.07924e-36	74.668
C9orf16	2.47726	3.12478	13.1861	7.98719e-38	1.09423e-36	74.6532
FARSA	2.48783	2.69398	13.1842	8.17501e-38	1.11876e-36	74.6301
ROMO1	2.72532	3.35069	13.1801	8.58421e-38	1.17351e-36	74.5816
CSE1L	1.91579	1.73378	13.1794	8.65701e-38	1.1822e-36	74.5732
IFNGR1	2.41953	6.07062	13.175	9.1223e-38	1.24442e-36	74.5212
USB1	2.4827	2.886	13.1661	1.01517e-37	1.38191e-36	74.4149
PGM2	2.11853	1.87419	13.1651	1.02673e-37	1.39615e-36	74.4037
C16orf13	2.62452	3.02054	13.1357	1.46065e-37	1.982e-36	74.0535
DENND6B	1.29059	0.796487	13.1345	1.48258e-37	2.00964e-36	74.0386
NME2	1.35398	0.669202	13.1335	1.49893e-37	2.02965e-36	74.0277
MRPS18B	2.32334	2.10344	13.1328	1.51156e-37	2.0446e-36	74.0194
CMTM3	2.12172	3.01183	13.1311	1.54304e-37	2.08498e-36	73.9989
PDSS1	1.26223	0.539734	13.1309	1.54689e-37	2.08798e-36	73.9965
RHNO1	1.71915	1.0682	13.1297	1.56948e-37	2.11624e-36	73.9821
ITPR2	2.27284	2.65398	13.1133	1.90935e-37	2.5718e-36	73.7873
CYB5R1	2.3136	2.01688	13.1068	2.06217e-37	2.77183e-36	73.7108
NDUFV3	1.90906	2.11966	13.1065	2.07083e-37	2.78055e-36	73.7066
SLC31A2	2.5784	4.08585	13.1032	2.15437e-37	2.88969e-36	73.6673
TXN2	2.73784	3.60978	13.0983	2.28482e-37	3.06147e-36	73.6089
PEMT	1.96399	1.23336	13.0976	2.30149e-37	3.08058e-36	73.6017
C14orf159	2.31261	2.30489	13.0961	2.34477e-37	3.13524e-36	73.5832
GOT2	2.07093	1.7695	13.0939	2.4063e-37	3.21416e-36	73.5575
MFN2	1.74758	1.45085	13.0913	2.48367e-37	3.31406e-36	73.526
TXNDC12	2.50856	3.27478	13.0847	2.68428e-37	3.57801e-36	73.4488
PKMYT1	1.25526	0.523368	13.0764	2.96616e-37	3.94965e-36	73.3496
C1orf43	2.66513	5.03983	13.0737	3.06246e-37	4.07364e-36	73.3179
BLVRB	2.85329	3.79174	13.0684	3.26155e-37	4.33398e-36	73.2553
CLMN	1.81851	1.52543	13.0669	3.32083e-37	4.40818e-36	73.2374
PBDC1	2.18772	1.81756	13.0653	3.38332e-37	4.48648e-36	73.2189
SIRPB2	1.97355	1.63485	13.0578	3.7012e-37	4.90295e-36	73.1297
NDST1	1.85737	1.4444	13.057	3.73639e-37	4.94445e-36	73.1203
MRPL53	2.54639	2.65736	13.0559	3.78522e-37	5.00391e-36	73.1074
CHCHD1	2.08196	1.67303	13.0524	3.9468e-37	5.21213e-36	73.0659
GTF3C6	2.68248	3.44493	13.0492	4.09817e-37	5.40646e-36	73.0285
PPM1N	1.24815	0.543356	13.0488	4.11968e-37	5.42926e-36	73.0233
SSBP1	2.89018	4.43979	13.046	4.25713e-37	5.60464e-36	72.9907
UXS1	1.90836	1.40959	13.0428	4.42573e-37	5.82063e-36	72.9521
COX6C	2.84618	5.55263	13.0352	4.84218e-37	6.36181e-36	72.8627
TGOLN2	2.09904	4.61608	13.0347	4.8694e-37	6.39102e-36	72.8572
TIMM21	1.66895	0.935115	13.0333	4.95447e-37	6.49603e-36	72.8399
LPCAT2	2.16823	2.54124	13.0235	5.56433e-37	7.28819e-36	72.7246
POP7	1.80886	1.12036	13.0234	5.57392e-37	7.2933e-36	72.7229
TMEM9B	2.49774	3.17823	12.9992	7.42937e-37	9.71119e-36	72.4374
NUTF2	2.53594	3.48939	12.9967	7.65218e-37	9.99224e-36	72.4081
UQCRQ	2.74846	5.81264	12.9948	7.82113e-37	1.02025e-35	72.3864
ACO2	2.38884	2.94974	12.9933	7.9615e-37	1.0375e-35	72.3687
NOD2	2.07687	2.18303	12.9882	8.46052e-37	1.10141e-35	72.3083
AC011933.1	2.31697	6.11912	12.9869	8.58718e-37	1.11677e-35	72.2936
MRPS23	2.25367	1.84443	12.9743	9.97883e-37	1.29644e-35	72.1444
PDCD1LG2	1.42239	0.71338	12.9735	1.0075e-36	1.30761e-35	72.1348
PRRC1	1.72323	1.28123	12.9703	1.04583e-36	1.35598e-35	72.0977
RDX	2.04125	1.67534	12.9692	1.05947e-36	1.37228e-35	72.0849
NARS	2.52004	3.68427	12.9666	1.09248e-36	1.41361e-35	72.0544
PVR	1.48627	0.873216	12.9643	1.12226e-36	1.45067e-35	72.0277
ZDHHC20	1.96218	1.52513	12.9549	1.25516e-36	1.62083e-35	71.9165
MRPS16	2.4484	2.90907	12.9532	1.2803e-36	1.65163e-35	71.8968
FAHD1	1.62466	1.01661	12.9403	1.49218e-36	1.9211e-35	71.7446
GNPNAT1	1.46727	0.784039	12.9397	1.50235e-36	1.93226e-35	71.7379
LEPROT	2.27099	3.16152	12.9232	1.82601e-36	2.34384e-35	71.5441
ADSL	2.31447	2.46608	12.9226	1.83906e-36	2.35823e-35	71.537
CD300C	2.43583	2.71964	12.9206	1.88157e-36	2.40792e-35	71.5143
FAR2	1.59266	0.896143	12.9205	1.8839e-36	2.4085e-35	71.5131
NDUFS2	2.64288	3.70085	12.9178	1.94622e-36	2.48569e-35	71.4807
RHOG	2.53029	5.74586	12.9153	2.00378e-36	2.55413e-35	71.4518
LYAR	1.81603	1.34914	12.9142	2.02879e-36	2.58343e-35	71.4395
WDR18	2.26603	1.91929	12.9101	2.12935e-36	2.70879e-35	71.3914
MOB3B	1.43433	1.04504	12.91	2.13266e-36	2.71032e-35	71.3899
NDUFV2P1	1.28852	1.82963	12.909	2.15885e-36	2.74088e-35	71.3777
CENPK	1.16365	0.451832	12.9055	2.24789e-36	2.85111e-35	71.3376
ATP5J2	2.83822	5.06249	12.8995	2.41265e-36	3.05706e-35	71.2673
RAB11A	2.68791	3.7984	12.8988	2.4327e-36	3.07942e-35	71.2591
CMC1	2.1969	1.7543	12.8985	2.44278e-36	3.08913e-35	71.255
HSD17B4	2.88659	3.52785	12.8978	2.46209e-36	3.11048e-35	71.2472
RP11-298I3.5	1.47242	1.01088	12.8947	2.55488e-36	3.22453e-35	71.2104
ARID5B	1.73123	1.62696	12.8822	2.95877e-36	3.73061e-35	71.0646
MALSU1	2.03168	1.39605	12.8782	3.10323e-36	3.90891e-35	71.0173
GLOD4	2.33421	2.39501	12.8684	3.48276e-36	4.37837e-35	70.9027
COPS6	2.78522	3.97666	12.8672	3.53267e-36	4.43436e-35	70.8885
KCNE3	1.72129	1.19479	12.8671	3.53421e-36	4.43436e-35	70.8881
MSR1	2.32158	3.07962	12.8636	3.68329e-36	4.61689e-35	70.8471
B3GAT3	2.19944	2.18262	12.8593	3.87446e-36	4.85177e-35	70.7968
TYROBP	1.6449	10.6158	12.8581	3.9301e-36	4.91666e-35	70.7826
GLB1	2.54386	3.65637	12.8471	4.47089e-36	5.58774e-35	70.6546
SYNE1	1.6729	1.19936	12.8397	4.8762e-36	6.08837e-35	70.5684
SWAP70	1.8929	1.82453	12.8386	4.94517e-36	6.16847e-35	70.5544
VPS37A	2.18958	2.07235	12.8356	5.11779e-36	6.37759e-35	70.5203
NAA10	2.5892	3.15437	12.8235	5.90328e-36	7.3493e-35	70.3785
C20orf112	1.67028	1.55856	12.8207	6.09977e-36	7.58655e-35	70.346
MED8	2.25837	2.19548	12.8183	6.27281e-36	7.7942e-35	70.3182
DOCK4	1.87269	1.62586	12.8131	6.66425e-36	8.27257e-35	70.2581
GLUD1	2.12192	2.14091	12.8107	6.85816e-36	8.50504e-35	70.2296
ALCAM	2.22922	2.64564	12.8008	7.699e-36	9.53858e-35	70.1147
IMPDH2	2.58741	3.18239	12.8001	7.76332e-36	9.60899e-35	70.1064
ELOVL1	2.64949	4.44307	12.7985	7.90999e-36	9.78108e-35	70.0879
LILRB2	2.06433	4.97977	12.7977	7.9837e-36	9.86271e-35	70.0786
EEF2K	1.58812	1.36736	12.7886	8.87943e-36	1.09587e-34	69.973
ACOX1	1.87888	1.81906	12.7819	9.611e-36	1.18502e-34	69.8944
VPS25	2.43182	2.36433	12.781	9.71194e-36	1.19631e-34	69.884
CORO1B	2.39051	3.66702	12.7727	1.06996e-35	1.31671e-34	69.7878
CTD-2008A1.2	1.10866	0.651626	12.771	1.09097e-35	1.34128e-34	69.7685
EMC1	2.02095	1.76525	12.7674	1.13867e-35	1.39858e-34	69.726
TCF19	1.00684	0.37136	12.7591	1.25487e-35	1.53982e-34	69.6295
TUFM	2.61788	4.86089	12.7588	1.25931e-35	1.54379e-34	69.626
SERPINH1	1.91197	1.31342	12.756	1.30088e-35	1.59324e-34	69.5937
NEU1	2.52006	3.09496	12.7538	1.33379e-35	1.63199e-34	69.5689
FAM96A	2.73181	4.92474	12.7506	1.38546e-35	1.69359e-34	69.5311
BRCC3	1.86609	1.45248	12.75	1.39536e-35	1.70407e-34	69.5241
GMFG	2.80795	4.88682	12.7481	1.42585e-35	1.73965e-34	69.5026
AZI2	2.4432	2.88647	12.7477	1.4337e-35	1.74756e-34	69.4971
RCC1	1.49698	0.882304	12.7436	1.50373e-35	1.83118e-34	69.4498
MDH2	2.4753	4.4655	12.7414	1.54195e-35	1.87594e-34	69.4248
YWHAG	1.66723	2.31767	12.7413	1.54451e-35	1.87727e-34	69.4232
CITED2	1.44686	1.11594	12.741	1.54919e-35	1.88118e-34	69.4202
PSMC2	2.55711	3.39158	12.7395	1.57683e-35	1.91294e-34	69.4026
F5	1.01196	0.3974	12.7355	1.65237e-35	2.00267e-34	69.3562
MYO7A	1.18642	0.587388	12.7347	1.66803e-35	2.01975e-34	69.3468
SUCLA2	2.00239	1.70134	12.7269	1.82764e-35	2.21093e-34	69.256
ACVR2A	1.43816	0.852576	12.724	1.8891e-35	2.28313e-34	69.2232
SDCCAG8	2.54045	3.30536	12.7159	2.07741e-35	2.50835e-34	69.1288
EFTUD1	1.74483	1.18775	12.7096	2.23448e-35	2.69293e-34	69.0564
CCDC25	1.83409	1.27502	12.7014	2.45979e-35	2.9589e-34	68.961
DPAGT1	2.13062	1.83435	12.7001	2.4963e-35	3.00001e-34	68.9464
GRPEL1	2.26014	2.33924	12.6811	3.11528e-35	3.74038e-34	68.7264
LYPLAL1	1.84266	1.20031	12.6785	3.21062e-35	3.85124e-34	68.6964
RNH1	2.41269	6.43116	12.6745	3.3629e-35	4.03013e-34	68.6504
C4orf3	2.16688	4.36973	12.6722	3.45447e-35	4.13601e-34	68.6237
SNHG17	2.23864	1.93031	12.6691	3.58065e-35	4.28308e-34	68.5881
NDUFA1	2.50965	5.20537	12.6664	3.69291e-35	4.41325e-34	68.5574
PSMD10	2.26813	2.11744	12.6586	4.04186e-35	4.82577e-34	68.4678
PSMD6	2.61366	3.53823	12.6579	4.07501e-35	4.86082e-34	68.4596
CCL2	3.14955	2.59791	12.6538	4.27698e-35	5.097e-34	68.4116
G6PC3	2.05659	1.97045	12.6534	4.29762e-35	5.11684e-34	68.4068
ADM	2.74481	2.48981	12.651	4.41918e-35	5.25669e-34	68.3791
CENPM	1.14384	0.406687	12.65	4.4677e-35	5.30948e-34	68.3683
CDCP1	1.7112	1.456	12.6478	4.58121e-35	5.43934e-34	68.3434
DTYMK	1.87732	1.34379	12.6476	4.59573e-35	5.45153e-34	68.3402
GPR108	2.54859	3.11504	12.6433	4.82949e-35	5.72352e-34	68.2909
CD58	2.63536	3.89018	12.6429	4.85328e-35	5.7464e-34	68.2861
KCTD12	1.63689	2.32508	12.6376	5.16138e-35	6.10556e-34	68.2249
GSAP	2.11672	2.14372	12.6223	6.15815e-35	7.27797e-34	68.0496
RUVBL2	2.23629	2.18144	12.6196	6.35438e-35	7.50297e-34	68.0184
UQCR11	2.28794	5.22565	12.6114	6.98543e-35	8.24049e-34	67.9244
GIMAP2	2.05719	1.56718	12.5962	8.33428e-35	9.82266e-34	67.7491
MECR	1.54991	0.843507	12.5927	8.68143e-35	1.0213e-33	67.7085
NDUFA13	2.62885	5.79247	12.5863	9.34026e-35	1.0978e-33	67.6359
TP53I3	1.54838	0.846131	12.585	9.48425e-35	1.1137e-33	67.6207
PRKAG1	2.35454	2.27045	12.5846	9.52747e-35	1.11776e-33	67.6162
SF3B14	2.54561	3.30239	12.5804	1.00035e-34	1.17146e-33	67.5678
LY96	2.63375	3.0317	12.577	1.04026e-34	1.21708e-33	67.5289
CNIH1	2.5527	3.13767	12.5763	1.04935e-34	1.2266e-33	67.5203
RGS10	2.49931	4.95683	12.5722	1.09922e-34	1.28373e-33	67.4742
CH25H	1.84378	0.941554	12.5705	1.12163e-34	1.30871e-33	67.4541
MRPS24	2.62964	3.20672	12.5674	1.16205e-34	1.35463e-33	67.419
STOML2	2.39442	2.76144	12.5654	1.18923e-34	1.38505e-33	67.396
MRPL3	2.4429	2.85848	12.5568	1.31339e-34	1.52828e-33	67.2974
AP2M1	2.35098	5.19371	12.5551	1.34008e-34	1.55791e-33	67.2774
RHEB	2.47701	3.91642	12.5543	1.35169e-34	1.56999e-33	67.2688
PRPS2	2.08305	2.06681	12.5533	1.36714e-34	1.5865e-33	67.2576
NDUFB8	2.46199	5.00909	12.5522	1.385e-34	1.60577e-33	67.2447
DAGLB	2.10141	2.14741	12.5517	1.39268e-34	1.61214e-33	67.2392
ETFB	2.46602	3.11017	12.5517	1.393e-34	1.61214e-33	67.2389
ZNF385A	2.32905	3.2125	12.5452	1.50133e-34	1.73594e-33	67.1646
NDUFA3	2.67154	4.32859	12.5451	1.50295e-34	1.73625e-33	67.1635
RAB6A	2.43432	3.48199	12.5442	1.519e-34	1.7532e-33	67.153
CCL3L3	2.10742	2.08776	12.5377	1.637e-34	1.8877e-33	67.0787
PDIA6	2.49838	5.09105	12.5319	1.74997e-34	2.01616e-33	67.0124
LXN	1.28453	0.548948	12.5272	1.84714e-34	2.12621e-33	66.9587
GALC	2.05008	1.9476	12.5244	1.90724e-34	2.19322e-33	66.9269
RAB1A	2.52894	5.48945	12.5244	1.90878e-34	2.19322e-33	66.9261
ENOSF1	1.74866	1.32755	12.5205	1.99534e-34	2.29062e-33	66.8821
DOK1	2.1994	2.33811	12.5157	2.10981e-34	2.41986e-33	66.8267
POLR2I	2.32917	2.03236	12.512	2.19972e-34	2.52073e-33	66.7853
ATL3	1.79395	1.89287	12.5067	2.33778e-34	2.67655e-33	66.7248
CCDC53	2.41567	2.50002	12.5056	2.36782e-34	2.70852e-33	66.7121
APOPT1	1.98832	1.63792	12.491	2.80249e-34	3.20288e-33	66.5448
TCEB1	2.37014	3.57421	12.4883	2.88914e-34	3.29897e-33	66.5145
ECHDC2	1.40009	0.732152	12.4867	2.94401e-34	3.35863e-33	66.4959
MTMR2	1.47885	0.933126	12.4863	2.95745e-34	3.37096e-33	66.4913
IER3IP1	1.9474	2.10258	12.4843	3.02476e-34	3.44463e-33	66.469
POLR3GL	1.88213	1.42428	12.4827	3.07988e-34	3.50429e-33	66.4511
BMP2K	1.74503	1.48952	12.4759	3.33211e-34	3.78791e-33	66.3729
MVB12A	1.843	1.66117	12.4733	3.43051e-34	3.89632e-33	66.344
TPM1	1.49867	0.790816	12.4715	3.50236e-34	3.9744e-33	66.3234
ARPC1A	2.35882	2.45078	12.4624	3.89017e-34	4.40668e-33	66.2191
SLC2A3	2.70908	6.55683	12.4606	3.96886e-34	4.49185e-33	66.1992
ALDH18A1	1.34548	0.758646	12.4603	3.98274e-34	4.50359e-33	66.1958
ADORA3	1.78408	1.07741	12.4596	4.01737e-34	4.53834e-33	66.1872
ZBTB38	1.61028	1.1599	12.4595	4.02055e-34	4.53834e-33	66.1864
B3GNT7	1.53929	1.07529	12.45	4.48478e-34	5.05345e-33	66.0779
MRPS36	1.9966	1.86432	12.4488	4.54518e-34	5.11702e-33	66.0646
SNRPE	2.69614	3.34521	12.4478	4.59535e-34	5.16897e-33	66.0537
SEC11A	2.649	4.75848	12.4346	5.34955e-34	6.00677e-33	65.9028
PDHA1	2.66766	3.33909	12.4336	5.40861e-34	6.06777e-33	65.8919
AARS	1.77468	1.37892	12.4295	5.66768e-34	6.35286e-33	65.8455
ICT1	1.76227	1.10709	12.4218	6.19071e-34	6.927e-33	65.7578
SEPP1	1.87719	0.893676	12.4204	6.29182e-34	7.034e-33	65.7417
MORN2	1.32779	0.564498	12.4126	6.87808e-34	7.68272e-33	65.6533
CAMK1	1.71797	1.2295	12.4122	6.91254e-34	7.71449e-33	65.6483
TTC38	1.52906	1.01096	12.4082	7.23341e-34	8.06557e-33	65.6033
SAMSN1	2.36715	3.60567	12.4077	7.27032e-34	8.09968e-33	65.5982
SGTB	1.36336	0.895617	12.4062	7.40015e-34	8.23717e-33	65.5806
RGS16	1.38404	0.695792	12.4048	7.52078e-34	8.36418e-33	65.5646
MTSS1	2.13967	2.05771	12.4021	7.75512e-34	8.61732e-33	65.5341
ITGAV	1.79388	1.32593	12.3991	8.02748e-34	8.90453e-33	65.4998
MRPL22	2.20702	1.91626	12.3956	8.35338e-34	9.25803e-33	65.4603
NANS	2.4912	4.16157	12.3856	9.36327e-34	1.03594e-32	65.347
MRPL44	1.82311	1.47571	12.3851	9.41452e-34	1.04071e-32	65.3416
GAL3ST4	1.67285	1.05817	12.372	1.09247e-33	1.20661e-32	65.1939
CNPY2	2.4946	2.85659	12.3567	1.30121e-33	1.43468e-32	65.0203
SGSH	2.0748	1.98924	12.3517	1.37661e-33	1.51651e-32	64.9643
EMC4	2.66529	3.9475	12.3482	1.434e-33	1.57838e-32	64.9238
SNAPIN	2.34169	3.00394	12.3453	1.48172e-33	1.62951e-32	64.8913
ESYT1	2.21648	2.48147	12.3422	1.53405e-33	1.68562e-32	64.8568
MTAP	1.56801	0.981826	12.3418	1.54203e-33	1.69293e-32	64.8517
UBE2V2	2.48123	3.26205	12.3372	1.62468e-33	1.78215e-32	64.7998
RARS	2.06313	1.92049	12.3197	1.98157e-33	2.17176e-32	64.6027
IKBKE	1.77372	1.3564	12.3192	1.99213e-33	2.18147e-32	64.5974
DPY30	2.24458	2.11535	12.3095	2.22415e-33	2.43347e-32	64.488
LTBR	2.44424	3.86684	12.3077	2.27026e-33	2.4818e-32	64.4677
TMEM52B	1.80513	1.5848	12.3005	2.46383e-33	2.68883e-32	64.3864
RABL5	1.01854	0.375913	12.2978	2.53927e-33	2.7688e-32	64.3565
COX20	2.21559	2.78995	12.2933	2.67411e-33	2.91335e-32	64.3051
AP1S1	1.09457	0.691397	12.2929	2.6871e-33	2.92502e-32	64.3003
MRPL35	1.61704	1.02712	12.2903	2.7661e-33	3.00845e-32	64.2715
NABP2	1.54084	1.04746	12.2893	2.79916e-33	3.04183e-32	64.2597
TBL2	1.81269	1.32629	12.2887	2.81551e-33	3.05701e-32	64.2539
SORT1	1.56079	1.34723	12.2867	2.88271e-33	3.12733e-32	64.2305
TADA3	1.87221	1.99707	12.2862	2.89765e-33	3.14087e-32	64.2254
PTPN12	1.84144	1.60166	12.2856	2.9173e-33	3.1595e-32	64.2187
ITPA	2.4419	2.9268	12.283	3.00506e-33	3.2518e-32	64.1893
DRAM2	2.67545	3.86129	12.2821	3.0341e-33	3.28046e-32	64.1797
NDUFS7	2.54344	4.89556	12.2789	3.14902e-33	3.39898e-32	64.1428
TMEM14C	2.49412	3.4664	12.2728	3.37289e-33	3.63755e-32	64.0746
MRPL51	2.48245	3.17195	12.2724	3.38737e-33	3.65011e-32	64.0704
DYNLRB1	2.56505	3.95239	12.2708	3.45095e-33	3.71549e-32	64.0519
RALB	2.18539	2.60891	12.2688	3.52939e-33	3.79676e-32	64.0296
SRPRB	2.05907	2.23675	12.2683	3.54869e-33	3.81433e-32	64.0242
SMIM20	2.05882	1.63302	12.2661	3.63905e-33	3.90817e-32	63.9992
GCSH	1.35263	0.715472	12.2657	3.65555e-33	3.92261e-32	63.9947
BHLHE41	1.25211	0.622491	12.2644	3.70802e-33	3.97558e-32	63.9806
ACAD9	1.7869	1.48315	12.2618	3.819e-33	4.09115e-32	63.9513
TMEM14B	2.46829	3.50703	12.2581	3.98201e-33	4.26221e-32	63.9098
GALK2	1.67318	1.12384	12.2501	4.36235e-33	4.66543e-32	63.8192
HDDC3	1.58338	0.923833	12.249	4.41689e-33	4.71981e-32	63.8069
NAGA	2.39361	4.88752	12.2484	4.44384e-33	4.74466e-32	63.8009
PPM1M	2.04099	2.21868	12.2479	4.46875e-33	4.76729e-32	63.7953
KCNAB2	2.1914	3.77461	12.2469	4.52087e-33	4.81888e-32	63.7838
TKT	2.44119	5.82373	12.2446	4.63866e-33	4.94033e-32	63.7583
HSD17B12	1.91398	2.16606	12.2423	4.76118e-33	5.0624e-32	63.7324
GMFB	1.9389	1.95062	12.2374	5.03093e-33	5.34479e-32	63.6777
IL17RA	1.77032	1.99069	12.227	5.65772e-33	6.00571e-32	63.5611
SGK3	1.83155	1.71207	12.2163	6.38471e-33	6.7718e-32	63.4411
JUN	2.14324	3.26295	12.2116	6.73426e-33	7.13665e-32	63.3882
NCLN	2.04039	2.08872	12.2104	6.82354e-33	7.22529e-32	63.3751
DAD1	2.61888	5.11392	12.2085	6.97639e-33	7.38105e-32	63.3531
ZDHHC12	2.3424	2.53189	12.2057	7.20007e-33	7.61141e-32	63.3218
TIMM13	2.43683	3.54129	12.2035	7.37593e-33	7.7909e-32	63.2979
PDLIM5	2.26345	2.71232	12.202	7.50716e-33	7.92299e-32	63.2803
PET100	2.77241	3.97623	12.2005	7.62832e-33	8.04423e-32	63.2645
RPP21	2.05196	1.56435	12.1953	8.08832e-33	8.52231e-32	63.2063
LAMTOR5	2.75503	4.7329	12.1949	8.12955e-33	8.55872e-32	63.2013
DYRK4	1.95562	1.41823	12.1899	8.59438e-33	9.04066e-32	63.1461
MINPP1	1.41236	0.846904	12.1871	8.87058e-33	9.32356e-32	63.1147
FLNA	2.02146	5.73267	12.1834	9.25428e-33	9.71888e-32	63.0726
PA2G4	2.28329	3.77492	12.1808	9.52723e-33	9.99736e-32	63.0438
FUNDC2	2.49235	3.02467	12.1804	9.56606e-33	1.00299e-31	63.0398
ARL3	1.12524	0.727189	12.1793	9.68383e-33	1.01451e-31	63.0276
RRAGA	2.11818	2.07076	12.1758	1.00794e-32	1.05509e-31	62.9879
MAPKAP1	1.99936	2.00911	12.1739	1.02929e-32	1.07656e-31	62.9671
PDXK	1.84936	1.82839	12.1729	1.0407e-32	1.0876e-31	62.9561
BOLA2B	2.2381	2.376	12.1728	1.04279e-32	1.0889e-31	62.9541
NDUFB4	2.59178	4.44789	12.1723	1.04873e-32	1.0938e-31	62.9485
IL4I1	2.75219	3.74968	12.1722	1.04919e-32	1.0938e-31	62.9481
CDC20	1.09515	0.362848	12.1705	1.0695e-32	1.11407e-31	62.929
ARRDC3	2.30607	3.1687	12.161	1.18977e-32	1.23834e-31	62.8232
CPNE8	1.86077	1.86151	12.1555	1.26587e-32	1.31649e-31	62.7617
CCT3	2.5676	4.3942	12.1488	1.36499e-32	1.41727e-31	62.6869
SNX6	2.45006	4.04369	12.1469	1.39456e-32	1.4468e-31	62.6656
GATM	1.64433	1.00334	12.1431	1.45464e-32	1.50791e-31	62.6237
QARS	2.64428	4.03236	12.1417	1.47782e-32	1.53071e-31	62.608
CKAP5	1.66299	1.4353	12.1413	1.48418e-32	1.53605e-31	62.6037
TBL3	1.89758	1.45264	12.1402	1.50362e-32	1.55491e-31	62.5908
TMBIM4	2.28082	5.28056	12.1388	1.52753e-32	1.57836e-31	62.5752
DNMT1	2.42062	3.54788	12.1375	1.54941e-32	1.59968e-31	62.5611
HMBS	1.90728	1.48455	12.1355	1.58455e-32	1.63465e-31	62.5388
FAM127B	1.86772	1.53036	12.1312	1.66199e-32	1.71316e-31	62.4914
NDUFA10	2.58207	4.20061	12.1279	1.7256e-32	1.7773e-31	62.4541
EFTUD2	2.40438	3.36495	12.1218	1.84716e-32	1.90097e-31	62.3866
SH3BGRL	2.29662	6.29394	12.1212	1.85975e-32	1.9124e-31	62.3798
DYNC1I2	2.10386	3.06388	12.1174	1.94168e-32	1.99432e-31	62.337
FXN	1.50927	0.84873	12.1173	1.94253e-32	1.99432e-31	62.3366
RPF2	1.90302	1.6818	12.112	2.06148e-32	2.11475e-31	62.2776
TUBB	2.49979	5.88345	12.1099	2.1101e-32	2.16289e-31	62.2545
C19orf60	2.5529	4.04476	12.107	2.18132e-32	2.23411e-31	62.2215
HAVCR2	2.37401	4.23674	12.1036	2.26594e-32	2.31893e-31	62.1837
S100A6	2.0122	8.62329	12.1013	2.32467e-32	2.37713e-31	62.1583
THYN1	2.13096	1.93453	12.1011	2.32845e-32	2.3791e-31	62.1567
RP11-841O20.2	2.09994	2.92597	12.0873	2.71715e-32	2.77184e-31	62.0035
TNFAIP8L2	2.2055	2.08169	12.0834	2.83989e-32	2.89475e-31	61.9596
C17orf58	1.2038	0.596971	12.0824	2.8706e-32	2.92372e-31	61.949
NDUFS6	2.05563	3.10505	12.0811	2.91265e-32	2.9642e-31	61.9345
MRPL33	2.43171	2.86491	12.0762	3.07666e-32	3.12863e-31	61.8802
NHLRC3	1.77836	1.77728	12.0743	3.14527e-32	3.19333e-31	61.8583
WDR12	1.81587	1.18778	12.0731	3.18457e-32	3.23068e-31	61.8459
EMC7	2.52877	3.6805	12.0658	3.45837e-32	3.5029e-31	61.7641
COX6B1	2.46663	5.91129	12.0614	3.63048e-32	3.67432e-31	61.7159
GSS	2.0279	1.81478	12.0612	3.63705e-32	3.67807e-31	61.7141
DPM2	2.0582	2.13884	12.0602	3.6796e-32	3.71817e-31	61.7025
POP4	2.31	2.22793	12.0561	3.85044e-32	3.88773e-31	61.6575
COG4	1.82214	1.52944	12.0464	4.2942e-32	4.33238e-31	61.5492
GRAMD1A	1.60762	1.16489	12.0327	5.00172e-32	5.04222e-31	61.3978
EXT2	1.74437	1.40582	12.0319	5.04493e-32	5.08178e-31	61.3893
SELT	2.5208	5.51581	12.0305	5.124e-32	5.15738e-31	61.3739
PCMT1	2.489	3.5954	12.0294	5.18535e-32	5.21504e-31	61.3621
PNPLA6	2.11192	2.93172	12.025	5.44951e-32	5.47642e-31	61.3127
ARL1	2.07619	1.96202	12.0157	6.03994e-32	6.05553e-31	61.2106
AIMP2	1.99249	1.77143	12.0113	6.34219e-32	6.35359e-31	61.1622
TANGO2	2.08769	2.01674	12.0053	6.77995e-32	6.78683e-31	61.0959
ACER3	2.07955	2.18438	12.0042	6.86252e-32	6.86412e-31	61.0839
RNF135	2.05756	2.37877	12.003	6.95838e-32	6.95458e-31	61.0701
FUCA1	2.06609	1.78088	12.0023	7.00863e-32	6.99935e-31	61.063
PHF21A	2.02031	2.30019	11.9991	7.26673e-32	7.25146e-31	61.0271
NDUFA11	2.55073	4.91438	11.9941	7.68259e-32	7.66049e-31	60.9719
POLR2L	2.09522	3.59849	11.9934	7.74357e-32	7.71529e-31	60.964
CISD1	1.75888	1.28124	11.9916	7.89388e-32	7.85285e-31	60.945
PLA2G7	1.95159	1.59392	11.991	7.95027e-32	7.90282e-31	60.9379
FIBP	2.38656	2.9916	11.9893	8.10472e-32	8.0501e-31	60.9188
DNAJC11	1.77379	1.48734	11.9861	8.39295e-32	8.32994e-31	60.8841
SPTSSA	1.29001	0.834371	11.985	8.49345e-32	8.42316e-31	60.8723
VTI1B	2.58909	3.44319	11.9819	8.792e-32	8.7125e-31	60.838
UBE2T	1.10584	0.426675	11.9813	8.85408e-32	8.76725e-31	60.831
CD99	2.05242	4.86172	11.978	9.18699e-32	9.08988e-31	60.7944
RP11-290F20.3	2.30062	3.17328	11.9763	9.36005e-32	9.25397e-31	60.7759
ATP6V1A	2.19605	3.29423	11.975	9.49435e-32	9.37951e-31	60.7617
CKS1B	1.77597	1.34456	11.9741	9.5869e-32	9.46365e-31	60.7521
EVI2A	2.39981	3.85279	11.9684	1.02215e-31	1.00823e-30	60.6885
ALG8	2.04699	1.71912	11.9671	1.03647e-31	1.02158e-30	60.6747
MRPL21	2.20887	2.18181	11.9627	1.08809e-31	1.07162e-30	60.6265
DLD	2.19958	2.93117	11.9586	1.13848e-31	1.12039e-30	60.5815
CINP	2.11706	1.88316	11.9534	1.20632e-31	1.18548e-30	60.5241
BABAM1	2.41012	3.14282	11.9534	1.20647e-31	1.18548e-30	60.524
BCAP31	2.35433	5.64212	11.9522	1.22283e-31	1.20064e-30	60.5106
MRPL47	1.98608	1.83571	11.9391	1.41296e-31	1.38626e-30	60.3672
CHCHD5	2.01053	1.84655	11.9369	1.44818e-31	1.41972e-30	60.3427
TARS	2.18812	2.3137	11.9325	1.52033e-31	1.48932e-30	60.2945
COX7A2	2.71258	6.10325	11.9303	1.55864e-31	1.52568e-30	60.2698
SRP9	2.47919	5.1626	11.9269	1.61818e-31	1.58276e-30	60.2326
SLC2A9	1.68063	1.3144	11.9266	1.62298e-31	1.58624e-30	60.2296
ATP6V0A1	2.2703	2.91908	11.919	1.76616e-31	1.72486e-30	60.1457
MRPL38	2.07	2.25227	11.9177	1.79143e-31	1.74821e-30	60.1316
SMUG1	1.80645	1.2503	11.9119	1.91012e-31	1.86262e-30	60.068
SCO1	1.60795	1.12025	11.9102	1.94458e-31	1.89478e-30	60.0502
PPFIBP2	1.69173	1.25168	11.91	1.95024e-31	1.89886e-30	60.0473
C6orf89	1.83943	1.81063	11.9097	1.9559e-31	1.90292e-30	60.0445
REEP5	2.54152	5.07718	11.9041	2.08106e-31	2.02316e-30	59.9829
ARL6IP4	2.51282	5.07423	11.9037	2.09044e-31	2.03074e-30	59.9785
BCAP29	2.05532	1.92273	11.9011	2.15086e-31	2.08785e-30	59.9502
EIF4E	2.20933	3.19257	11.8968	2.25589e-31	2.18815e-30	59.9029
ADSS	1.83898	1.83636	11.8961	2.27301e-31	2.20308e-30	59.8954
DGCR6L	2.08738	2.03065	11.8934	2.34125e-31	2.26751e-30	59.866
LINC00493	2.38496	2.7113	11.8858	2.54769e-31	2.46558e-30	59.7822
HMGCL	1.95963	1.64409	11.8845	2.58418e-31	2.49902e-30	59.768
FAM210A	1.70643	1.39615	11.8782	2.77075e-31	2.67741e-30	59.6989
OCIAD1	2.329	3.34423	11.8718	2.97177e-31	2.86735e-30	59.6294
GIMAP1	1.28384	0.917297	11.8664	3.15377e-31	3.04066e-30	59.5704
ERI3	1.65516	1.27865	11.8605	3.36547e-31	3.24233e-30	59.5059
C4orf48	2.29279	3.23302	11.8577	3.47041e-31	3.34092e-30	59.4754
SOD1	2.52151	4.49724	11.8494	3.80177e-31	3.65718e-30	59.3849
TMEM256	2.14227	2.08411	11.8441	4.03061e-31	3.8744e-30	59.3269
CXCL2	3.0039	3.37885	11.8435	4.05596e-31	3.89584e-30	59.3207
ABHD12	1.93315	1.90807	11.8414	4.15192e-31	3.98503e-30	59.2975
ZMYM6NB	2.28127	2.39018	11.8369	4.36472e-31	4.18302e-30	59.2479
MNDA	2.35896	4.95691	11.8249	4.97884e-31	4.76802e-30	59.1173
TMEM179B	2.58099	4.1311	11.8161	5.48133e-31	5.2453e-30	59.0219
DEF8	2.09105	2.01046	11.8151	5.54068e-31	5.29815e-30	59.0112
CMPK1	1.89775	2.07701	11.8126	5.69753e-31	5.44407e-30	58.9835
SDHC	2.38057	3.66351	11.809	5.92742e-31	5.65952e-30	58.9442
YIPF3	2.41564	3.29395	11.8045	6.22661e-31	5.9401e-30	58.8954
NDUFA12	2.64081	3.86394	11.8044	6.23055e-31	5.9401e-30	58.8947
MRPL4	2.05593	2.46206	11.7984	6.65674e-31	6.3417e-30	58.8291
LIMK1	1.66509	1.65668	11.7966	6.78544e-31	6.45952e-30	58.8101
MPC1	2.40732	3.06944	11.7964	6.80566e-31	6.47396e-30	58.8071
UBXN2B	1.86333	2.04521	11.7949	6.91955e-31	6.57742e-30	58.7907
PRPSAP1	1.67837	1.26383	11.7929	7.068e-31	6.71355e-30	58.7696
TSPAN3	2.36331	3.7725	11.7906	7.24762e-31	6.87907e-30	58.7447
PHAX	1.71237	1.15766	11.789	7.38139e-31	7.00086e-30	58.7266
GFM1	1.81823	1.62469	11.7887	7.40528e-31	7.01833e-30	58.7234
APEX1	2.4413	4.6512	11.7827	7.90069e-31	7.48231e-30	58.6591
ATP5F1	2.65884	5.99402	11.7812	8.03792e-31	7.60666e-30	58.642
PPIL1	1.42037	0.790822	11.7768	8.43635e-31	7.97783e-30	58.594
HAT1	2.08592	2.086	11.7736	8.72994e-31	8.24937e-30	58.5601
RP3-469D22.1	1.24235	1.41687	11.7686	9.22696e-31	8.7062e-30	58.5051
GYPC	1.86536	1.99061	11.7664	9.44573e-31	8.89953e-30	58.4819
ATG9A	1.70854	1.35308	11.7584	1.03165e-30	9.71286e-30	58.3944
IFNAR1	2.2043	2.94556	11.7579	1.03626e-30	9.74902e-30	58.39
CCDC90B	2.11737	2.00378	11.7549	1.07135e-30	1.00718e-29	58.3569
GM2A	2.04407	3.33369	11.7515	1.1116e-30	1.04425e-29	58.3203
PRPF31	2.06554	2.10285	11.7466	1.17252e-30	1.10068e-29	58.2674
MPDU1	2.30378	3.29506	11.7463	1.17715e-30	1.10421e-29	58.2635
CLN5	1.65649	1.31902	11.7441	1.20574e-30	1.1302e-29	58.2397
DENND3	2.07503	2.8001	11.7372	1.29949e-30	1.2163e-29	58.1654
MCOLN1	2.10907	2.44538	11.7357	1.32149e-30	1.23599e-29	58.1487
COMMD2	1.88848	1.60164	11.7352	1.3278e-30	1.24099e-29	58.144
EIF1AX	1.99912	2.82626	11.7307	1.39552e-30	1.30333e-29	58.0946
DCAF12	1.76035	1.72218	11.7266	1.45909e-30	1.36171e-29	58.0504
LCP2	1.93776	4.74704	11.7258	1.47134e-30	1.37214e-29	58.0421
TSN	1.9718	1.95906	11.7251	1.48387e-30	1.38283e-29	58.0337
LYPLA1	2.1459	2.76851	11.7245	1.4928e-30	1.38962e-29	58.0278
NCSTN	2.38124	4.10744	11.7224	1.52721e-30	1.42011e-29	58.0052
HSBP1	2.19246	3.93611	11.7218	1.53806e-30	1.42917e-29	57.9981
RNF7	2.56066	4.29383	11.7202	1.56404e-30	1.45225e-29	57.9815
BROX	1.98408	3.64632	11.7171	1.61747e-30	1.50079e-29	57.9482
DENND2D	1.75307	1.31728	11.7166	1.62737e-30	1.50888e-29	57.9421
EIF3CL	1.90537	3.84568	11.7136	1.6809e-30	1.55738e-29	57.91
FABP5P7	1.96182	2.17729	11.7098	1.75287e-30	1.6229e-29	57.8684
ICMT	1.58299	1.23992	11.7063	1.82046e-30	1.68426e-29	57.8309
LILRB4	2.29606	6.14633	11.7047	1.85219e-30	1.71237e-29	57.8137
PFKL	2.19282	4.78856	11.7034	1.87889e-30	1.73581e-29	57.7995
HAUS1	1.8851	1.48302	11.6949	2.06082e-30	1.90251e-29	57.7078
PPP1R7	2.12731	2.3603	11.6911	2.14837e-30	1.98048e-29	57.6666
C16orf70	1.89074	1.71897	11.6891	2.19594e-30	2.02288e-29	57.6448
APEH	2.39557	3.10378	11.688	2.22113e-30	2.04462e-29	57.6335
CTDSP2	1.71214	1.86284	11.6865	2.25895e-30	2.07794e-29	57.6168
C2CD5	1.57577	1.32523	11.6849	2.29695e-30	2.11138e-29	57.6002
NDUFS8	2.49192	4.23339	11.6768	2.50919e-30	2.30483e-29	57.5125
POLR2F	2.14943	2.07237	11.6736	2.59797e-30	2.38467e-29	57.478
MAD2L1	1.23326	0.564794	11.6563	3.13311e-30	2.87381e-29	57.2922
VAPA	2.32073	5.68386	11.6562	3.1363e-30	2.87468e-29	57.2912
SHCBP1	1.01574	0.441058	11.6525	3.26723e-30	2.99254e-29	57.2506
ALG1	1.53985	1.04608	11.6489	3.39578e-30	3.10807e-29	57.2124
TMEM60	1.82708	1.46515	11.6377	3.83345e-30	3.50365e-29	57.0921
POLR2J2	1.32693	1.25658	11.637	3.86523e-30	3.53019e-29	57.0839
TMPO	1.91694	2.04545	11.6323	4.06652e-30	3.70875e-29	57.0335
COQ3	1.01076	0.403694	11.6309	4.12923e-30	3.76327e-29	57.0183
ACAA2	2.20134	2.57762	11.6236	4.46815e-30	4.06926e-29	56.9401
SEC22C	1.46589	0.95503	11.6177	4.7595e-30	4.33152e-29	56.8774
AFG3L2	1.36469	1.03453	11.6166	4.819e-30	4.38256e-29	56.8651
ACTR1A	2.22096	3.69688	11.6142	4.94421e-30	4.49006e-29	56.8396
MDP1	1.65521	1.13504	11.6132	4.9977e-30	4.53542e-29	56.829
MIEF1	1.34507	0.91497	11.6128	5.02036e-30	4.55277e-29	56.8245
UNC13D	1.90219	2.07493	11.6124	5.0447e-30	4.5716e-29	56.8197
COPS8	1.9667	1.84688	11.6122	5.05299e-30	4.57589e-29	56.8181
PSMB2	1.98807	3.29932	11.6119	5.06788e-30	4.58613e-29	56.8151
CYB561D2	2.23621	2.48415	11.6058	5.41654e-30	4.89819e-29	56.7491
POLD2	2.12328	2.14577	11.6012	5.69154e-30	5.14325e-29	56.7
RPL23AP79	1.67191	1.53738	11.601	5.70153e-30	5.14864e-29	56.6983
RAF1	2.09169	2.7285	11.6008	5.71363e-30	5.15594e-29	56.6962
RMDN1	1.95332	1.784	11.5902	6.40851e-30	5.77893e-29	56.5823
FKBP3	2.05694	2.2497	11.5889	6.50111e-30	5.85831e-29	56.5681
YIF1B	2.3699	3.65807	11.5852	6.76589e-30	6.09263e-29	56.5285
FARSB	1.66817	1.42169	11.5833	6.90391e-30	6.21255e-29	56.5084
GLIPR2	2.26908	4.42378	11.583	6.92413e-30	6.22638e-29	56.5055
RP6-109B7.3	1.15426	0.569075	11.578	7.31153e-30	6.57013e-29	56.4515
JKAMP	2.29061	2.60765	11.5761	7.46644e-30	6.70464e-29	56.4307
SCAMP3	2.28052	2.94912	11.5698	7.98434e-30	7.16467e-29	56.3642
IRF5	2.08271	3.11196	11.5665	8.27769e-30	7.41753e-29	56.3284
SIRT2	1.99074	2.42604	11.5632	8.57563e-30	7.67914e-29	56.2933
TXNIP	2.50735	5.85713	11.5572	9.14831e-30	8.18053e-29	56.2292
PRMT5	1.91245	1.59433	11.5538	9.49533e-30	8.47902e-29	56.1923
GGTA1P	1.59589	1.08678	11.5515	9.72333e-30	8.67656e-29	56.1687
SNRPD1	2.26907	3.46398	11.5495	9.93577e-30	8.85997e-29	56.1473
SETD7	1.25531	0.873313	11.5476	1.01437e-29	9.03912e-29	56.1268
MRPS12	2.06969	2.01174	11.547	1.02078e-29	9.0899e-29	56.1205
IL1RAP	1.8298	1.61007	11.5418	1.0794e-29	9.6052e-29	56.0651
SLC25A19	2.38437	3.03333	11.5404	1.09682e-29	9.75347e-29	56.0492
TACC3	1.72299	1.41686	11.5378	1.12686e-29	1.00136e-28	56.0224
GALNS	1.70729	1.48148	11.5355	1.1558e-29	1.02638e-28	55.9973
DBI	2.4877	5.99199	11.5343	1.17021e-29	1.03845e-28	55.985
DHRS7B	1.44648	0.85497	11.5324	1.19463e-29	1.05939e-28	55.9645
USP14	1.86436	1.87619	11.5304	1.22021e-29	1.08132e-28	55.9435
CACYBP	2.38011	3.97765	11.5288	1.24227e-29	1.10011e-28	55.9257
COMMD5	1.90122	1.79402	11.5201	1.36344e-29	1.20575e-28	55.8334
SNX4	2.00604	2.00551	11.5195	1.37233e-29	1.21278e-28	55.8269
VPS28	2.49695	5.01869	11.5161	1.42422e-29	1.25776e-28	55.7901
MCTS1	2.13726	2.27861	11.5143	1.45109e-29	1.28061e-28	55.7716
PGM1	1.51422	1.08177	11.5133	1.46706e-29	1.29382e-28	55.7607
HTATIP2	2.11578	2.21526	11.5103	1.51487e-29	1.33506e-28	55.7289
UQCRH	2.53738	5.52704	11.5083	1.54769e-29	1.36211e-28	55.7077
GGA1	1.94871	2.46648	11.5082	1.54975e-29	1.363e-28	55.7063
C19orf48	1.74871	1.34807	11.5018	1.6601e-29	1.45904e-28	55.6381
CUEDC2	2.3392	3.00159	11.4901	1.88061e-29	1.65171e-28	55.5144
POLR2H	1.93635	1.61201	11.4891	1.90117e-29	1.66863e-28	55.5036
GNPAT	1.78125	1.61504	11.4868	1.94966e-29	1.71002e-28	55.4786
GBE1	1.69811	1.41009	11.4828	2.0339e-29	1.78269e-28	55.4367
OAT	2.12703	2.50917	11.4779	2.14325e-29	1.87725e-28	55.3847
CASP4	2.53387	4.90075	11.4752	2.20609e-29	1.92966e-28	55.3561
NDUFA5	2.11047	2.86999	11.4748	2.2172e-29	1.93805e-28	55.3511
EMP3	1.95114	6.90096	11.4741	2.23273e-29	1.95029e-28	55.3442
MTIF2	1.5764	1.45195	11.472	2.28398e-29	1.99234e-28	55.3217
PTGES3	2.19737	5.78728	11.4618	2.54632e-29	2.21967e-28	55.2138
C21orf59	1.69261	1.3869	11.457	2.68311e-29	2.33733e-28	55.1619
NAA50	1.95598	2.29829	11.456	2.70928e-29	2.35853e-28	55.1523
G3BP1	2.09979	3.56534	11.455	2.73932e-29	2.38306e-28	55.1414
VTA1	2.18155	2.70562	11.4545	2.75564e-29	2.39563e-28	55.1355
FHL3	1.71608	1.288	11.4524	2.81551e-29	2.44602e-28	55.1141
IDH3B	2.31498	4.13648	11.449	2.92129e-29	2.5362e-28	55.0776
CCPG1	1.90034	1.83418	11.4457	3.02648e-29	2.62575e-28	55.0425
HDHD1	1.5034	0.981759	11.4386	3.26488e-29	2.83067e-28	54.9673
DCLRE1B	1.04918	0.587237	11.4385	3.26824e-29	2.83166e-28	54.9663
DCTD	2.02499	2.07835	11.4342	3.42176e-29	2.96267e-28	54.9207
C19orf53	2.44662	4.06447	11.4315	3.52218e-29	3.04757e-28	54.892
PSMC3	2.37949	3.74988	11.4307	3.55268e-29	3.07188e-28	54.8835
ZMAT5	1.86269	1.61667	11.4291	3.61317e-29	3.12208e-28	54.8667
PSMD4	2.5241	4.83385	11.4289	3.62025e-29	3.12609e-28	54.8648
CDC25B	1.17321	0.658531	11.4286	3.63042e-29	3.13276e-28	54.862
COMMD7	2.20854	2.49094	11.4232	3.84675e-29	3.3172e-28	54.8046
CCDC47	2.08252	2.7345	11.4176	4.08431e-29	3.5197e-28	54.7452
KCNJ2	1.28635	0.948912	11.416	4.15384e-29	3.57721e-28	54.7284
C14orf119	2.28118	2.76954	11.4014	4.85526e-29	4.17846e-28	54.5737
OSTM1	1.89435	2.16271	11.4011	4.86713e-29	4.18587e-28	54.5713
C19orf59	2.1046	1.74505	11.3919	5.36829e-29	4.61069e-28	54.4741
UFC1	2.3432	4.03075	11.3905	5.45105e-29	4.67864e-28	54.4589
NDUFV1	2.47756	4.29912	11.3901	5.47186e-29	4.69335e-28	54.4551
PLIN2	2.69093	4.69771	11.3865	5.68768e-29	4.87521e-28	54.4167
PLEC	1.48978	2.61781	11.3749	6.43737e-29	5.51044e-28	54.2939
LSMD1	2.29755	2.94279	11.3723	6.61774e-29	5.66106e-28	54.2665
INF2	1.73337	1.79255	11.3697	6.79872e-29	5.812e-28	54.2398
ZMPSTE24	1.64722	1.55662	11.3655	7.1142e-29	6.07764e-28	54.1948
RP11-294J22.6	1.96116	2.41914	11.3645	7.18532e-29	6.13431e-28	54.1849
ATP6V0D1	2.15097	5.96736	11.3596	7.56745e-29	6.45625e-28	54.1335
ACTR1B	1.52904	1.17855	11.3583	7.6739e-29	6.54271e-28	54.1197
HEBP1	1.93221	1.82372	11.3511	8.283e-29	7.05734e-28	54.0439
DHRS3	2.46804	3.19408	11.3479	8.5699e-29	7.29693e-28	54.0102
IDH3G	2.36086	3.68053	11.3476	8.60008e-29	7.31777e-28	54.0067
IQGAP1	1.77471	5.17798	11.3471	8.64595e-29	7.35193e-28	54.0014
PTPLAD1	1.39421	0.949002	11.3412	9.20034e-29	7.81816e-28	53.9398
LY86	2.34735	3.86767	11.3408	9.24272e-29	7.84896e-28	53.9352
PSMD14	2.14967	2.77334	11.3381	9.50675e-29	8.06784e-28	53.9073
SHFM1	2.14656	4.16454	11.3375	9.56853e-29	8.1149e-28	53.9009
MS4A7	2.29394	4.20091	11.333	1.00394e-28	8.5086e-28	53.8532
ESD	2.37494	3.74366	11.3324	1.00998e-28	8.55416e-28	53.8473
ACP5	2.56449	3.33984	11.3312	1.02298e-28	8.65852e-28	53.8346
CMKLR1	1.8458	1.80258	11.3271	1.0689e-28	9.04125e-28	53.791
HNRNPLL	1.48319	1.36825	11.3217	1.13107e-28	9.56075e-28	53.735
MFSD11	1.66662	1.53632	11.3202	1.14945e-28	9.70971e-28	53.719
C7orf60	1.28926	0.85104	11.3183	1.17279e-28	9.90042e-28	53.6991
NDUFA9	2.1543	3.3277	11.3167	1.193e-28	1.00643e-27	53.6821
SDF4	1.83101	2.09866	11.3145	1.22088e-28	1.02928e-27	53.6592
C10orf11	1.62579	1.34695	11.2958	1.48813e-28	1.25294e-27	53.4629
HMOX2	2.04141	2.19707	11.2898	1.5847e-28	1.33338e-27	53.4006
ACAD8	1.50246	1.0229	11.2876	1.62325e-28	1.36491e-27	53.3767
OXA1L	2.37183	4.38543	11.2847	1.67237e-28	1.40529e-27	53.3472
IL6	1.19938	0.478966	11.2799	1.76064e-28	1.4785e-27	53.2962
AVPI1	2.07298	2.16757	11.2742	1.86983e-28	1.56814e-27	53.2365
VMA21	1.848	2.2626	11.271	1.93419e-28	1.62e-27	53.2029
COA4	2.07144	2.48019	11.266	2.03876e-28	1.70647e-27	53.1507
MTF1	1.62407	1.44333	11.2576	2.22781e-28	1.86348e-27	53.0628
AKR7A2	2.09154	2.34891	11.2517	2.3693e-28	1.98054e-27	53.0017
REEP4	1.99999	2.12964	11.2449	2.54471e-28	2.12578e-27	52.9309
P4HB	2.12842	6.77805	11.2434	2.58632e-28	2.15914e-27	52.9148
KEAP1	1.94575	2.01814	11.2381	2.7345e-28	2.27988e-27	52.8596
GPN1	1.81596	1.64874	11.2329	2.88926e-28	2.40585e-27	52.805
EPB41L2	1.68618	1.58862	11.2329	2.88935e-28	2.40585e-27	52.805
ATP5G3	2.29518	6.49152	11.2323	2.90501e-28	2.41733e-27	52.7996
GTF2H3	1.31635	0.841131	11.2296	2.98968e-28	2.48456e-27	52.7711
IFFO1	1.66659	1.59089	11.2278	3.04728e-28	2.53078e-27	52.7522
UNG	1.05916	0.520067	11.2256	3.11682e-28	2.58686e-27	52.7298
ANXA7	2.27386	4.13369	11.2221	3.23652e-28	2.68273e-27	52.6925
PRADC1	1.50246	0.999831	11.2133	3.5472e-28	2.93836e-27	52.6016
GARS	2.0917	2.76406	11.2132	3.55254e-28	2.94088e-27	52.6001
TFPT	1.68026	1.50998	11.2111	3.63124e-28	3.00409e-27	52.5784
MINK1	1.18261	1.07946	11.206	3.83072e-28	3.16504e-27	52.5253
PDHB	2.14853	2.70736	11.2006	4.0536e-28	3.34703e-27	52.4693
TWF1	1.91334	1.87654	11.2005	4.06099e-28	3.35041e-27	52.4675
CXCL16	2.26969	5.40203	11.2004	4.06292e-28	3.35041e-27	52.467
CWC15	1.81906	2.00963	11.2	4.0806e-28	3.36283e-27	52.4627
PCGF1	1.43349	0.891935	11.1986	4.14147e-28	3.4108e-27	52.448
PIH1D1	2.20031	2.62508	11.198	4.16873e-28	3.43104e-27	52.4415
KIAA1841	1.15286	0.714559	11.1978	4.17559e-28	3.43449e-27	52.4399
PPCS	2.2323	3.39596	11.1953	4.2869e-28	3.52378e-27	52.4138
CAPZB	1.79318	6.61004	11.1923	4.42295e-28	3.63096e-27	52.3828
GMPR2	2.19463	2.24205	11.1919	4.44312e-28	3.64518e-27	52.3783
TP53I11	1.9464	2.41762	11.1903	4.5181e-28	3.70432e-27	52.3617
PLAUR	2.28282	7.78668	11.1864	4.708e-28	3.85756e-27	52.3209
CDKN3	1.05605	0.376052	11.1804	5.00973e-28	4.10215e-27	52.2593
TXNL1	2.15346	3.13717	11.179	5.08453e-28	4.16075e-27	52.2446
DRG1	2.05261	2.26042	11.1777	5.15216e-28	4.2134e-27	52.2315
PUF60	2.31147	3.89131	11.1772	5.18137e-28	4.23459e-27	52.2259
RNASEH2A	1.47359	0.959861	11.1768	5.20471e-28	4.25096e-27	52.2214
HDAC2	2.11832	2.69871	11.1752	5.28904e-28	4.31708e-27	52.2055
GGH	1.42601	0.853664	11.1743	5.34245e-28	4.3579e-27	52.1955
NDUFV2	2.39853	5.3937	11.1721	5.46809e-28	4.45756e-27	52.1725
GORAB	1.02222	0.497703	11.1685	5.67605e-28	4.62415e-27	52.1355
ERGIC3	2.39689	4.71811	11.1626	6.03909e-28	4.91677e-27	52.074
INSIG2	1.67171	1.42763	11.1619	6.08268e-28	4.94913e-27	52.0669
ADIPOR1	2.2363	4.49134	11.1612	6.12714e-28	4.98213e-27	52.0597
VPS29	2.41004	5.52764	11.1555	6.5057e-28	5.2866e-27	52.0002
APH1A	1.868	2.49577	11.154	6.60245e-28	5.36182e-27	51.9856
FCGR3B	1.59534	1.97492	11.1524	6.71708e-28	5.44801e-27	51.9685
TMEM256-PLSCR3	1.31585	1.05209	11.1499	6.89197e-28	5.58633e-27	51.943
YIPF1	1.85951	1.88595	11.1493	6.93498e-28	5.61764e-27	51.9369
TMEM18	1.84189	1.58826	11.1467	7.12774e-28	5.77014e-27	51.9097
MYL6B	1.46425	1.11171	11.142	7.48727e-28	6.05737e-27	51.8609
GLRX3	2.24384	3.16817	11.1405	7.60824e-28	6.15135e-27	51.845
AP2A2	1.47554	1.44505	11.1337	8.16536e-28	6.59348e-27	51.7749
ERAL1	1.73608	1.40248	11.1322	8.29808e-28	6.69643e-27	51.759
ASAP1	1.71403	2.48083	11.1299	8.49399e-28	6.85021e-27	51.7358
PHB	2.2363	3.86658	11.1291	8.56518e-28	6.90328e-27	51.7275
RABGGTA	2.03647	2.01255	11.1226	9.16603e-28	7.38291e-27	51.6603
PPA2	2.23366	2.98756	11.1221	9.21312e-28	7.41618e-27	51.6552
TCF7L2	1.27293	1.07175	11.1217	9.25682e-28	7.44669e-27	51.6506
MYO1F	1.85151	4.96229	11.1178	9.63991e-28	7.74514e-27	51.6104
SF3B3	1.97405	2.25738	11.1129	1.01485e-27	8.14868e-27	51.5594
RP11-977G19.10	1.19435	0.877878	11.1111	1.03392e-27	8.29659e-27	51.5409
S100A13	1.09961	0.498688	11.111	1.03509e-27	8.30076e-27	51.5398
KIAA0196	1.77966	1.74582	11.1039	1.1139e-27	8.92723e-27	51.4671
GTF2E1	1.1995	0.679256	11.0996	1.16479e-27	9.32924e-27	51.4228
ATP5C1	2.39682	5.9003	11.0988	1.17475e-27	9.4031e-27	51.4143
RPS6KA1	2.16548	3.25131	11.097	1.19765e-27	9.58045e-27	51.3952
PSMG2	2.33495	3.69463	11.0642	1.68296e-27	1.34375e-26	51.0579
METTL17	2.22232	2.56618	11.0642	1.68444e-27	1.34409e-26	51.0571
LSM3	1.39287	1.75151	11.0621	1.72153e-27	1.37283e-26	51.0355
CHURC1	2.26898	3.50155	11.0577	1.80213e-27	1.43622e-26	50.9901
TRPV2	2.29022	3.23437	11.0561	1.83187e-27	1.45901e-26	50.9739
ZNF106	1.98043	3.66787	11.0548	1.85595e-27	1.47727e-26	50.9609
CAPRIN1	2.06429	3.58325	11.053	1.89146e-27	1.50367e-26	50.9422
ARL11	1.42299	1.24736	11.0497	1.95713e-27	1.55484e-26	50.9083
MLF1IP	1.11828	0.544002	11.0496	1.95946e-27	1.55484e-26	50.9071
BANF1	2.23203	4.64327	11.0481	1.98955e-27	1.57676e-26	50.892
RPA3	1.5927	1.27565	11.0436	2.08524e-27	1.65158e-26	50.8455
RAP1B	2.2012	5.27568	11.0426	2.10764e-27	1.66829e-26	50.8349
SNX11	1.69056	1.41331	11.0392	2.18306e-27	1.72692e-26	50.8
C5orf22	1.32221	0.893476	11.0354	2.26956e-27	1.79424e-26	50.7615
FUOM	2.16769	2.385	11.0296	2.41024e-27	1.90311e-26	50.7019
AKAP10	1.69752	1.74247	11.0251	2.52492e-27	1.99243e-26	50.6558
ASB13	1.26106	0.768216	11.02	2.6631e-27	2.10018e-26	50.603
SOCS6	1.24175	0.777358	11.0162	2.76763e-27	2.18128e-26	50.5648
IL15RA	1.62169	1.25989	11.0113	2.91225e-27	2.28962e-26	50.5143
CTDSP1	1.65655	1.96459	11.0082	3.0069e-27	2.36259e-26	50.4826
SCAMP1	1.5241	1.20709	11.0081	3.01251e-27	2.36546e-26	50.4808
ISOC2	1.56763	1.21308	11.008	3.01424e-27	2.36546e-26	50.4802
SARS	2.19483	3.48371	11.0075	3.02971e-27	2.37469e-26	50.4751
ANP32B	2.07212	3.89799	11.0067	3.05429e-27	2.39249e-26	50.4671
PFKP	2.02463	2.72143	11.0059	3.07974e-27	2.41096e-26	50.4589
GPATCH4	1.49304	1.04656	11.0043	3.13163e-27	2.45008e-26	50.4423
IL21R	1.3655	0.99873	11.0041	3.13762e-27	2.45328e-26	50.4404
ARFIP1	1.5554	1.26618	11.0007	3.2503e-27	2.53983e-26	50.4055
GCA	2.26054	3.89061	10.9979	3.34447e-27	2.61182e-26	50.3772
WDR61	2.12289	2.77861	10.9978	3.34833e-27	2.61325e-26	50.376
FAM206A	1.47193	1.00699	10.9932	3.51219e-27	2.73946e-26	50.3287
ABCD4	2.03132	2.10478	10.9882	3.69645e-27	2.88144e-26	50.278
DMAP1	1.57007	1.20241	10.9872	3.73845e-27	2.9124e-26	50.2668
MPC2	1.99383	2.28035	10.985	3.82319e-27	2.97661e-26	50.2446
NDUFA7	1.81711	2.096	10.9837	3.87277e-27	3.01338e-26	50.2318
RFT1	1.73078	1.46401	10.9836	3.8783e-27	3.01586e-26	50.2304
PCNA	1.81003	1.51264	10.9832	3.89432e-27	3.02648e-26	50.2263
SCAMP2	2.14688	4.57741	10.9788	4.07477e-27	3.1648e-26	50.1814
GPS1	2.22358	3.15441	10.978	4.10754e-27	3.18831e-26	50.1734
WDR55	1.67456	1.90551	10.9775	4.13113e-27	3.20469e-26	50.1678
MTFR1L	1.76068	1.53818	10.9751	4.235e-27	3.28328e-26	50.1432
MRPS27	1.71924	1.65152	10.9712	4.40628e-27	3.414e-26	50.1039
TTC4	1.32169	0.878083	10.9657	4.66497e-27	3.61225e-26	50.0473
POLR2M	1.62034	1.45453	10.9643	4.73201e-27	3.66195e-26	50.0332
LAMTOR3	2.2042	2.96367	10.9642	4.73494e-27	3.66201e-26	50.0326
FNTB	1.20591	0.749933	10.9629	4.80282e-27	3.71227e-26	50.0184
FXYD5	1.96371	6.9449	10.9522	5.35792e-27	4.13883e-26	49.91
PHACTR2	1.41596	1.58515	10.9478	5.60854e-27	4.32982e-26	49.8647
COQ6	1.44671	0.909407	10.9467	5.67486e-27	4.37839e-26	49.8531
SH3BGRL3	1.14045	9.72894	10.9457	5.72923e-27	4.41767e-26	49.8436
RBMS1P1	1.05722	0.786711	10.9449	5.77831e-27	4.45284e-26	49.8352
MRPL2	1.70709	1.43362	10.9437	5.84983e-27	4.50525e-26	49.823
ABHD5	1.71413	1.48197	10.9407	6.03297e-27	4.6435e-26	49.7924
NUDCD3	1.57052	1.34689	10.9381	6.19617e-27	4.7634e-26	49.766
EMG1	1.80323	1.7418	10.9368	6.28116e-27	4.82584e-26	49.7525
KLHL18	1.67188	1.44923	10.9361	6.32585e-27	4.85727e-26	49.7454
ATF6	1.48538	2.07391	10.9351	6.39236e-27	4.9054e-26	49.7351
EIF2B3	1.58422	1.19721	10.9339	6.4691e-27	4.96132e-26	49.7232
MRPL9	2.03764	2.135	10.9246	7.12242e-27	5.45584e-26	49.6279
STARD3	2.03448	2.55963	10.9235	7.20089e-27	5.51266e-26	49.617
NDUFAF4	1.5896	1.12627	10.9096	8.30708e-27	6.34539e-26	49.4754
WDR34	1.02296	0.470635	10.9095	8.31641e-27	6.3477e-26	49.4743
ISCA2	1.97408	2.00033	10.9069	8.53458e-27	6.51035e-26	49.4486
SMIM19	1.79187	1.58564	10.9057	8.64611e-27	6.5915e-26	49.4357
NUDT21	2.02465	2.35067	10.9044	8.7585e-27	6.67322e-26	49.4229
C1GALT1C1	1.74948	1.52774	10.9008	9.09052e-27	6.91796e-26	49.3861
UBR7	1.54845	1.24649	10.8959	9.55352e-27	7.26169e-26	49.3368
FKBP8	1.31553	1.58083	10.8955	9.59183e-27	7.28649e-26	49.3329
ALOX5AP	2.47661	5.63019	10.8944	9.70854e-27	7.36642e-26	49.3209
APEX2	1.31366	0.945514	10.8926	9.88751e-27	7.49778e-26	49.3028
KIAA1737	1.07698	0.598513	10.8921	9.93862e-27	7.53209e-26	49.2977
PON2	1.96847	2.21148	10.8839	1.08036e-26	8.18277e-26	49.215
TIMM17A	2.00737	2.66351	10.8799	1.12595e-26	8.52309e-26	49.174
HEXA	2.37575	4.34871	10.8796	1.12994e-26	8.54824e-26	49.1705
CD99L2	1.22906	0.899008	10.8756	1.17598e-26	8.89129e-26	49.1309
CIB1	2.11291	4.7079	10.8746	1.1883e-26	8.97913e-26	49.1206
CLEC2B	1.99703	3.13139	10.8728	1.2108e-26	9.14378e-26	49.102
PIEZO1	1.90297	2.07216	10.8608	1.36924e-26	1.03281e-25	48.9801
SNRPD3	2.08048	3.4163	10.8597	1.3839e-26	1.04264e-25	48.9696
DNASE2	2.10872	2.44954	10.8593	1.39064e-26	1.04711e-25	48.9647
PDAP1	1.67073	2.70893	10.8587	1.39906e-26	1.05282e-25	48.9588
PSENEN	2.22156	3.16856	10.8583	1.40373e-26	1.05572e-25	48.9555
MTMR6	1.42579	1.40758	10.8559	1.43892e-26	1.08155e-25	48.9309
WBP2	1.99475	4.01346	10.8535	1.47485e-26	1.10791e-25	48.9065
MRPS5	2.06076	2.72431	10.8462	1.58886e-26	1.19216e-25	48.8327
CRTAP	2.27471	4.49286	10.843	1.64245e-26	1.23093e-25	48.7998
NDUFAF5	1.11492	0.554365	10.8408	1.67849e-26	1.2572e-25	48.7783
AURKA	1.04813	0.48266	10.8394	1.70376e-26	1.27464e-25	48.7635
MRPS21	1.94178	3.04955	10.8392	1.70636e-26	1.27584e-25	48.762
GOLT1B	1.81733	1.91559	10.8383	1.72169e-26	1.28655e-25	48.7531
PSMD7	2.19737	3.97206	10.8347	1.78624e-26	1.33323e-25	48.7166
SF3A3	2.12449	2.87768	10.8325	1.82737e-26	1.36314e-25	48.6941
TPRKB	1.82735	1.76011	10.8279	1.91539e-26	1.42797e-25	48.6475
ANKRD52	1.16741	0.965447	10.8278	1.91653e-26	1.42799e-25	48.6469
EIF2S1	2.21283	3.22149	10.8247	1.97825e-26	1.47312e-25	48.6155
CCNB1	1.12761	0.476651	10.8211	2.05174e-26	1.52695e-25	48.5793
RRP1	1.4371	1.20177	10.8177	2.12501e-26	1.58057e-25	48.5445
RNFT1	1.89984	1.969	10.8164	2.1538e-26	1.60106e-25	48.5312
TPCN1	1.8579	2.28541	10.8153	2.17713e-26	1.61746e-25	48.5205
PDHX	1.42822	1.13353	10.8128	2.23371e-26	1.65853e-25	48.4951
MTND2P28	1.51083	6.48211	10.8112	2.26984e-26	1.68438e-25	48.4792
SEH1L	1.77839	2.01105	10.8109	2.27742e-26	1.68903e-25	48.4759
LST1	2.16393	6.42896	10.8106	2.28356e-26	1.69261e-25	48.4732
PTRH1	1.32077	0.78205	10.8067	2.37703e-26	1.75985e-25	48.4335
CBX3	2.00361	4.31836	10.8036	2.45231e-26	1.81454e-25	48.4026
TMEM160	1.76	1.82117	10.8022	2.48931e-26	1.84086e-25	48.3877
YARS	1.89149	2.24401	10.8004	2.53449e-26	1.87318e-25	48.3699
LIMK2	1.52179	1.40041	10.7989	2.57421e-26	1.90144e-25	48.3545
TM2D2	1.91616	1.96076	10.797	2.62312e-26	1.93645e-25	48.3359
POLD3	1.31986	0.863265	10.7948	2.68176e-26	1.97861e-25	48.3139
ATG5	1.54999	1.52063	10.7926	2.7421e-26	2.02197e-25	48.2919
GLA	2.53052	4.46828	10.7905	2.80132e-26	2.06326e-25	48.2707
PCYOX1	1.01498	0.568289	10.7872	2.89779e-26	2.13309e-25	48.2372
SSNA1	2.03959	2.55429	10.7871	2.90012e-26	2.13358e-25	48.2364
MAN1B1	1.7885	1.82427	10.7842	2.98832e-26	2.19594e-25	48.2067
SARNP	2.1801	3.31663	10.7802	3.11302e-26	2.28627e-25	48.1662
GNPTAB	1.45977	1.57084	10.7749	3.28505e-26	2.40985e-25	48.1129
NBR1	1.68507	2.10869	10.7741	3.3107e-26	2.42728e-25	48.1052
TMEM101	1.65498	1.42588	10.7705	3.43458e-26	2.51667e-25	48.0688
MRPS10	1.65037	1.77784	10.7703	3.43945e-26	2.5188e-25	48.0674
TIMP2	1.38404	1.41604	10.7698	3.45769e-26	2.5307e-25	48.0621
ATP6V0B	2.0782	7.40899	10.763	3.70655e-26	2.7113e-25	47.9933
SLC39A4	1.54966	1.12801	10.7628	3.71265e-26	2.71421e-25	47.9916
URM1	1.49887	1.71969	10.7618	3.75027e-26	2.74015e-25	47.9816
KCTD10	1.75536	1.80635	10.7611	3.77708e-26	2.75817e-25	47.9746
TTC1	1.91166	2.27178	10.761	3.78158e-26	2.75989e-25	47.9734
TUBB6	2.14041	3.03906	10.7587	3.87089e-26	2.82346e-25	47.9503
PHB2	2.22278	4.12215	10.7573	3.92723e-26	2.8613e-25	47.9359
C19orf10	2.17535	5.26925	10.7542	4.05299e-26	2.95125e-25	47.9047
GIMAP8	1.32928	1.03653	10.7539	4.0642e-26	2.95773e-25	47.902
AASDHPPT	1.67661	1.63077	10.7514	4.16846e-26	3.03189e-25	47.8769
VPS11	1.76144	1.78726	10.7504	4.21155e-26	3.06149e-25	47.8667
ANP32E	1.95755	2.89086	10.7474	4.34208e-26	3.15459e-25	47.8364
C12orf10	2.03626	2.15305	10.7468	4.36625e-26	3.17035e-25	47.8309
METAP1	1.5451	1.43719	10.7465	4.38219e-26	3.18013e-25	47.8273
LAMP2	2.07993	4.91203	10.742	4.58389e-26	3.32461e-25	47.7827
ITSN1	1.41621	1.03261	10.7415	4.60576e-26	3.33859e-25	47.778
NDUFAF2	1.48185	1.1473	10.7407	4.64526e-26	3.36532e-25	47.7696
NDUFAF3	2.23867	3.66735	10.7389	4.72881e-26	3.42391e-25	47.7519
RAD23A	1.8482	3.82651	10.7352	4.90988e-26	3.55301e-25	47.7147
DPP3	1.81925	1.88177	10.7326	5.04346e-26	3.64762e-25	47.6881
ZCRB1	1.8989	2.08534	10.7322	5.06067e-26	3.658e-25	47.6847
DPP9	1.80675	2.37622	10.7309	5.12919e-26	3.70336e-25	47.6714
PRKCD	1.86679	2.70969	10.7252	5.43618e-26	3.92156e-25	47.6138
TRPM4	1.37721	1.16352	10.7251	5.43752e-26	3.92156e-25	47.6135
BFAR	1.77765	1.78593	10.7219	5.61691e-26	4.04866e-25	47.5814
RAB35	1.28932	1.25341	10.7181	5.83959e-26	4.20444e-25	47.5428
ABL2	1.55719	1.51916	10.7135	6.11634e-26	4.40123e-25	47.497
TLR1	1.88473	2.10506	10.7132	6.13244e-26	4.41033e-25	47.4944
C18orf32	2.24206	3.67469	10.71	6.33325e-26	4.5522e-25	47.4624
ABCC5	1.29472	0.917606	10.7045	6.70019e-26	4.81325e-25	47.4066
EIF4E2	2.12617	3.25042	10.7042	6.72061e-26	4.82522e-25	47.4036
NMD3	1.66582	1.62747	10.7008	6.95486e-26	4.99061e-25	47.3697
CLN6	1.18155	0.781935	10.6967	7.24726e-26	5.19752e-25	47.3289
BLMH	1.45603	1.11324	10.695	7.36946e-26	5.27925e-25	47.3123
MRPL42	1.77141	1.58649	10.6936	7.47897e-26	5.35471e-25	47.2977
PVRL2	1.55159	1.55708	10.6903	7.73294e-26	5.53345e-25	47.2646
MYO5A	1.67268	1.9903	10.6849	8.15891e-26	5.83176e-25	47.2115
MIPEP	1.02894	0.518289	10.6834	8.29061e-26	5.91929e-25	47.1956
DLAT	1.30272	0.960762	10.6774	8.80052e-26	6.27986e-25	47.1365
VCAN	2.26521	3.81148	10.6772	8.82244e-26	6.292e-25	47.134
RP11-6N17.6	1.53177	1.3127	10.6765	8.88472e-26	6.3329e-25	47.127
CPEB4	1.35804	1.50715	10.676	8.92579e-26	6.35863e-25	47.1225
BCS1L	1.48662	0.981016	10.6755	8.9739e-26	6.38936e-25	47.1171
MLH1	1.59783	1.40389	10.6751	9.00642e-26	6.40895e-25	47.1136
SDF2L1	2.19425	2.70502	10.6738	9.12423e-26	6.48918e-25	47.1007
TOMM22	1.96891	3.36596	10.6722	9.27364e-26	6.59179e-25	47.0846
LAMTOR4	2.36179	5.76442	10.6717	9.32184e-26	6.62238e-25	47.0795
PRCP	2.11787	3.63083	10.6709	9.40242e-26	6.67593e-25	47.0709
MRPL28	2.10549	2.73109	10.6706	9.43033e-26	6.69204e-25	47.068
METTL5	1.89934	1.7891	10.6681	9.67102e-26	6.85905e-25	47.043
PSMC4	2.15864	3.17279	10.6678	9.70049e-26	6.87614e-25	47.04
SHKBP1	2.18944	4.60627	10.6645	1.00216e-25	7.09593e-25	47.0077
BCKDHA	2.07683	2.87021	10.6617	1.03104e-25	7.29238e-25	46.9796
C15orf38-AP3S2	1.58436	1.65267	10.6527	1.12884e-25	7.97529e-25	46.8898
SAE1	1.84571	2.02661	10.6485	1.17753e-25	8.31468e-25	46.848
TGM2	1.90314	2.32576	10.6481	1.18229e-25	8.3437e-25	46.844
NUBP2	1.93741	2.2351	10.6475	1.18911e-25	8.3872e-25	46.8383
TXNDC9	1.63731	1.42462	10.6452	1.21654e-25	8.57126e-25	46.8157
IGSF8	1.05957	0.711753	10.6309	1.40463e-25	9.89104e-25	46.6733
CTTNBP2NL	1.70708	1.8744	10.6285	1.43969e-25	1.01268e-24	46.6488
TMEM50A	2.19	4.82077	10.6278	1.44961e-25	1.0191e-24	46.642
SLC19A1	1.47006	1.32457	10.6255	1.48346e-25	1.04233e-24	46.6192
ACP1	2.17059	3.3309	10.6235	1.51323e-25	1.06266e-24	46.5995
TMEM230	2.19613	4.27918	10.623	1.52114e-25	1.06763e-24	46.5943
RER1	2.2124	4.66271	10.6207	1.55664e-25	1.09194e-24	46.5715
POLR2J	2.2018	3.37017	10.6206	1.55856e-25	1.0927e-24	46.5702
EGR1	2.14654	3.79244	10.6203	1.56336e-25	1.09546e-24	46.5672
FAM98A	1.17174	0.702267	10.6183	1.59422e-25	1.11648e-24	46.5478
GTDC1	1.41861	0.993096	10.609	1.75055e-25	1.22529e-24	46.4552
ASNSD1	1.55011	1.26666	10.6058	1.8067e-25	1.2639e-24	46.4239
GLE1	1.4643	1.27444	10.6055	1.81297e-25	1.2676e-24	46.4204
SRD5A3	1.50269	1.20155	10.6021	1.87546e-25	1.31058e-24	46.3869
HN1	2.26348	3.42752	10.6017	1.88246e-25	1.31475e-24	46.3832
MRPL18	2.17543	3.23626	10.5977	1.95988e-25	1.36808e-24	46.3433
HS1BP3	1.41256	1.09485	10.5952	2.00952e-25	1.40196e-24	46.3185
PNP	2.20463	3.06083	10.5945	2.02355e-25	1.41098e-24	46.3116
PPP2R4	1.63791	2.37418	10.5936	2.04249e-25	1.42342e-24	46.3024
COX16	1.81175	2.44161	10.5895	2.12748e-25	1.48104e-24	46.262
UBXN8	1.1238	0.609704	10.5887	2.14352e-25	1.49139e-24	46.2545
PSMB1	2.22207	6.38971	10.5837	2.25491e-25	1.56804e-24	46.2043
TMEM222	1.50253	1.18539	10.5831	2.26735e-25	1.57584e-24	46.1989
PKIB	1.6619	1.36077	10.583	2.27083e-25	1.5774e-24	46.1974
ACTR10	2.14683	2.75606	10.5824	2.2831e-25	1.58507e-24	46.192
ACTR3	1.92557	6.76351	10.5818	2.29784e-25	1.59443e-24	46.1857
SMYD2	1.29004	0.81685	10.5729	2.51155e-25	1.74179e-24	46.0976
SZRD1	1.70229	2.67504	10.5711	2.55606e-25	1.77169e-24	46.0802
ARPC5	1.7556	7.14857	10.5706	2.56943e-25	1.78e-24	46.075
PEAK1	1.23253	1.02638	10.5696	2.59528e-25	1.79654e-24	46.0651
LYRM4	1.62008	1.62224	10.5696	2.59611e-25	1.79654e-24	46.0648
ZNF511	1.8408	1.78126	10.5694	2.60154e-25	1.79933e-24	46.0627
RFK	1.51553	1.23567	10.5641	2.74293e-25	1.8961e-24	46.0103
RNF26	1.11802	0.741318	10.5624	2.78836e-25	1.92646e-24	45.994
AURKAIP1	2.16366	3.7125	10.5596	2.86933e-25	1.98027e-24	45.9656
DSCR3	1.83746	2.32415	10.5587	2.89323e-25	1.99569e-24	45.9574
TRAPPC3	2.06	2.97371	10.5582	2.90802e-25	2.00482e-24	45.9524
FBXW5	1.92545	2.91021	10.5575	2.92895e-25	2.01816e-24	45.9453
SMIM7	2.09286	3.24128	10.5572	2.93647e-25	2.02226e-24	45.9427
DCTN3	2.24138	3.25776	10.5539	3.03672e-25	2.08971e-24	45.9095
SCAND1	2.11554	3.55804	10.5538	3.03768e-25	2.08971e-24	45.9092
LRPPRC	1.63475	1.91689	10.5517	3.10183e-25	2.13269e-24	45.8885
GAA	1.95989	3.56628	10.5506	3.13848e-25	2.15674e-24	45.8768
WDR13	1.81584	1.72408	10.5442	3.34528e-25	2.29762e-24	45.8136
STX12	1.96501	2.83003	10.5424	3.40377e-25	2.33654e-24	45.7964
ARL15	1.23734	0.868386	10.5351	3.66086e-25	2.51033e-24	45.7243
LMAN1	1.46941	1.60989	10.5334	3.72315e-25	2.55168e-24	45.7076
NDUFA2	2.07263	3.22742	10.5324	3.76119e-25	2.57637e-24	45.6975
MYOF	1.73436	2.51768	10.5268	3.97786e-25	2.72334e-24	45.6421
TMEM219	2.30801	4.58205	10.526	4.01077e-25	2.7444e-24	45.6339
NTMT1	1.85811	2.02375	10.5218	4.17814e-25	2.85741e-24	45.5934
ADK	1.69518	1.76692	10.5192	4.28825e-25	2.93114e-24	45.5676
ECI2	1.50179	1.16537	10.5186	4.31599e-25	2.94853e-24	45.5612
PSTPIP2	1.81441	2.30195	10.5168	4.39373e-25	3.00004e-24	45.5436
TIMMDC1	2.02988	2.61814	10.515	4.47175e-25	3.05169e-24	45.5261
BSG	1.8207	5.04144	10.5138	4.52604e-25	3.08546e-24	45.5142
CLTB	1.54943	1.3383	10.5137	4.53091e-25	3.08714e-24	45.5131
CHCHD7	1.93055	2.21046	10.5127	4.57454e-25	3.11521e-24	45.5036
CRAT	1.3852	0.999111	10.511	4.65176e-25	3.16611e-24	45.487
BUD31	2.35669	4.05608	10.5066	4.86081e-25	3.30489e-24	45.4435
MRRF	1.77792	1.81914	10.5056	4.91254e-25	3.33829e-24	45.433
TFG	2.0434	2.96892	10.5027	5.05572e-25	3.43195e-24	45.4046
TMOD3	1.67766	2.27593	10.5	5.18891e-25	3.51864e-24	45.3788
XPOT	1.36101	1.19742	10.4929	5.56827e-25	3.77189e-24	45.3089
RNF14	1.53084	1.3132	10.4805	6.29674e-25	4.2631e-24	45.1871
NCKIPSD	1.19989	0.880526	10.4797	6.3496e-25	4.29662e-24	45.1789
CBX1	1.06892	0.674365	10.4765	6.55647e-25	4.43427e-24	45.1471
AIFM1	1.58216	1.43615	10.4747	6.67017e-25	4.50878e-24	45.1301
TRNAU1AP	1.69242	1.67679	10.4742	6.7061e-25	4.53068e-24	45.1248
MCRS1	1.76467	1.89957	10.4739	6.72705e-25	4.54244e-24	45.1217
LRRC58	1.13393	1.18325	10.4735	6.75395e-25	4.5582e-24	45.1177
PSMD1	2.00505	2.82357	10.4727	6.80489e-25	4.59017e-24	45.1103
NIPSNAP3A	1.84356	2.18297	10.4668	7.21733e-25	4.86581e-24	45.052
MRPL32	1.78769	1.77319	10.4657	7.29457e-25	4.9153e-24	45.0414
TMEM167A	2.36361	4.03981	10.4608	7.6545e-25	5.15242e-24	44.9937
MRPS33	1.85853	1.85187	10.46	7.72037e-25	5.19404e-24	44.9853
RNF41	1.55638	1.36411	10.4572	7.93376e-25	5.3348e-24	44.9583
NRIP3	1.15161	0.73023	10.4536	8.22254e-25	5.52608e-24	44.9228
SERPINB1	1.98848	5.36538	10.4531	8.26296e-25	5.55033e-24	44.918
MRPL41	1.54724	1.83542	10.4527	8.2949e-25	5.56888e-24	44.9142
BDH2	1.15203	0.637255	10.4522	8.33911e-25	5.59562e-24	44.9089
CTC-518P12.6	1.37307	1.55025	10.4512	8.42205e-25	5.64833e-24	44.8991
TSR1	1.37473	1.16916	10.4496	8.55233e-25	5.7327e-24	44.8839
APOA1BP	1.90296	2.20096	10.4481	8.68037e-25	5.81549e-24	44.8692
IL8	2.7352	4.14552	10.4475	8.73843e-25	5.85133e-24	44.8626
YWHAQ	2.07402	4.01615	10.4473	8.74812e-25	5.85476e-24	44.8615
ASGR1	1.49679	1.27605	10.4467	8.80566e-25	5.89019e-24	44.855
POLR1D	2.11298	3.61258	10.4442	9.02087e-25	6.031e-24	44.8311
AGPAT2	1.84936	1.9106	10.4437	9.06675e-25	6.05851e-24	44.826
UBE2D4	1.3873	1.19916	10.4398	9.42151e-25	6.29229e-24	44.788
CHMP2A	2.24949	4.82803	10.4397	9.43626e-25	6.29887e-24	44.7865
SF3B5	2.23658	4.01368	10.439	9.49616e-25	6.33555e-24	44.7802
MRPL39	1.66347	1.48077	10.4385	9.54492e-25	6.36477e-24	44.7751
RIC8A	1.80397	1.99042	10.4328	1.0098e-24	6.73011e-24	44.7194
DDB2	1.46486	1.27524	10.4319	1.01928e-24	6.78972e-24	44.7101
OSTF1	2.07404	4.60239	10.4277	1.06176e-24	7.06901e-24	44.6697
CDKN2AIP	1.25443	0.851663	10.4272	1.06732e-24	7.10233e-24	44.6645
LSM2	1.82412	1.9632	10.427	1.06923e-24	7.11138e-24	44.6627
UCKL1	1.43767	1.24171	10.4257	1.08329e-24	7.20114e-24	44.6498
RP1-232L22__B.1	1.29001	1.86582	10.4172	1.17772e-24	7.82485e-24	44.567
NTAN1	1.58359	1.27414	10.4168	1.18298e-24	7.85573e-24	44.5626
PPP2R5D	1.58773	1.53755	10.4151	1.20258e-24	7.9817e-24	44.5463
EIF3I	2.14426	4.56973	10.4118	1.24207e-24	8.23956e-24	44.5143
PLGRKT	1.73046	1.79831	10.4116	1.24506e-24	8.25511e-24	44.5119
DBR1	1.19204	0.788609	10.4101	1.26369e-24	8.37429e-24	44.4972
ITFG1	1.88396	2.50635	10.4066	1.30772e-24	8.65713e-24	44.4633
CHTOP	1.967	2.76366	10.4058	1.31793e-24	8.72027e-24	44.4556
FTSJ2	1.46087	1.18349	10.4047	1.33252e-24	8.81222e-24	44.4447
COPG1	2.01865	2.96305	10.4026	1.36078e-24	8.98987e-24	44.4239
TMEM9	1.42189	1.04102	10.4	1.39625e-24	9.21942e-24	44.3984
C11orf48	2.0034	2.47858	10.3932	1.4929e-24	9.84238e-24	44.3322
LSM6	1.92642	2.34108	10.3911	1.5232e-24	1.0037e-23	44.3123
APPL2	1.27022	0.961022	10.3895	1.54741e-24	1.01913e-23	44.2966
TBC1D9B	1.91059	3.53995	10.3891	1.55383e-24	1.02283e-23	44.2925
MTHFD2	2.21561	4.49463	10.3884	1.56444e-24	1.02928e-23	44.2858
C4orf27	1.47013	1.1708	10.3855	1.60972e-24	1.05799e-23	44.2576
RIOK3	2.05875	3.09454	10.3842	1.63101e-24	1.07143e-23	44.2445
TXNRD1	1.77726	2.18822	10.3765	1.75889e-24	1.15485e-23	44.1698
RAB27A	1.30585	0.913984	10.3743	1.79696e-24	1.17864e-23	44.1486
CDC123	2.05952	2.97155	10.3741	1.80164e-24	1.1811e-23	44.146
IPO11	1.2357	0.806372	10.3726	1.82711e-24	1.19719e-23	44.1321
ITGB1P1	1.3146	1.34741	10.3719	1.83999e-24	1.20502e-23	44.1251
TMCO4	1.24392	0.882449	10.3694	1.88656e-24	1.23489e-23	44.1004
SMIM12	1.95747	2.42973	10.3666	1.93871e-24	1.26837e-23	44.0734
PRKCH	1.28516	1.01108	10.3639	1.99035e-24	1.30149e-23	44.0474
PIM1	2.05266	2.67863	10.3595	2.0782e-24	1.35825e-23	44.0046
POLR2K	1.9157	2.41611	10.3587	2.09487e-24	1.36775e-23	43.9967
VWA5A	1.06907	0.589764	10.356	2.15015e-24	1.40313e-23	43.9709
STXBP2	1.88047	5.35326	10.3523	2.23178e-24	1.45565e-23	43.934
MINA	1.47276	1.31058	10.3487	2.31036e-24	1.50614e-23	43.8997
CD86	2.03685	4.69666	10.3486	2.3125e-24	1.50677e-23	43.8988
RIPK3	1.41309	1.07964	10.3454	2.38785e-24	1.55429e-23	43.8671
TBC1D23	1.48292	1.41371	10.3453	2.38936e-24	1.55448e-23	43.8664
TIMM23	1.99395	2.66143	10.345	2.39518e-24	1.55748e-23	43.864
PSMB6	2.24415	5.65319	10.343	2.44388e-24	1.58753e-23	43.8441
RBFA	1.43045	1.2258	10.3383	2.55822e-24	1.66096e-23	43.7988
SLC17A5	1.34332	1.14959	10.3381	2.56395e-24	1.66384e-23	43.7966
MTPAP	1.74229	2.35717	10.3379	2.56864e-24	1.66604e-23	43.7948
BLCAP	1.80768	2.27894	10.3376	2.57765e-24	1.67104e-23	43.7913
MLEC	1.49931	1.53914	10.3372	2.58639e-24	1.67586e-23	43.788
RBX1	1.8798	4.31911	10.3326	2.70469e-24	1.75163e-23	43.7437
SPIN1	1.49458	1.42279	10.3324	2.71197e-24	1.75546e-23	43.741
SLC35F2	1.07214	0.728549	10.3301	2.77363e-24	1.79446e-23	43.7188
DCAF11	1.75207	2.01148	10.3283	2.82332e-24	1.82569e-23	43.7012
ITGB1BP1	2.04352	2.58403	10.3259	2.88922e-24	1.86736e-23	43.6783
SCARB1	1.71244	2.04338	10.324	2.94379e-24	1.90167e-23	43.6598
NDUFC2	2.31356	4.80964	10.3224	2.98905e-24	1.92897e-23	43.6447
NOC2L	1.7481	2.26485	10.3197	3.07134e-24	1.98107e-23	43.6178
PIGN	1.34377	1.03276	10.3143	3.23722e-24	2.08702e-23	43.5657
SGTA	1.70958	2.21358	10.3134	3.26503e-24	2.1039e-23	43.5572
GLRX	2.22041	4.03126	10.3128	3.28364e-24	2.11482e-23	43.5516
ERGIC2	2.06927	2.33559	10.3124	3.29785e-24	2.12291e-23	43.5473
TAF9	2.23126	3.40424	10.3115	3.32666e-24	2.14038e-23	43.5387
COPS5	1.95058	2.4801	10.3111	3.33796e-24	2.14657e-23	43.5354
TCAIM	1.42086	1.12678	10.3109	3.34684e-24	2.1512e-23	43.5327
TMEM199	1.54578	1.41568	10.3108	3.34951e-24	2.15184e-23	43.532
RPL26L1	1.63933	1.48163	10.3106	3.35501e-24	2.15429e-23	43.5303
FAM105A	1.92711	2.83158	10.3094	3.39553e-24	2.17923e-23	43.5184
RAB10	2.03678	4.96816	10.2926	3.99984e-24	2.56578e-23	43.3563
GSKIP	1.20786	0.772249	10.29	4.10207e-24	2.63004e-23	43.3313
SURF4	2.02672	3.90053	10.2869	4.22809e-24	2.70948e-23	43.3013
GPR141	1.19361	0.964498	10.2851	4.30631e-24	2.75823e-23	43.2832
RAB18	2.03356	2.75147	10.2844	4.33402e-24	2.77459e-23	43.2768
NME1-NME2	2.09873	6.86954	10.2823	4.42611e-24	2.83214e-23	43.256
SLC3A2	2.20325	5.41275	10.2794	4.5491e-24	2.90938e-23	43.2289
C16orf62	1.73956	2.15659	10.2778	4.62383e-24	2.9557e-23	43.2127
G0S2	2.95533	3.64278	10.2739	4.79967e-24	3.06588e-23	43.1758
TOLLIP	1.83081	2.34858	10.2739	4.80097e-24	3.06588e-23	43.1755
MRPL46	1.37969	1.01335	10.2734	4.82424e-24	3.07921e-23	43.1707
TMEM33	1.73666	3.08724	10.2729	4.84804e-24	3.09285e-23	43.1658
PREP	1.36049	1.16552	10.2698	4.99662e-24	3.18606e-23	43.136
ARRB1	1.6049	1.71773	10.2675	5.11272e-24	3.25733e-23	43.1132
MRPL36	1.83154	1.84602	10.2648	5.24713e-24	3.34081e-23	43.0875
SERPINB8	1.72498	1.71442	10.2615	5.41983e-24	3.44906e-23	43.0555
NGFRAP1	1.11946	0.593041	10.2608	5.45592e-24	3.4703e-23	43.0489
FASTKD2	1.33086	1.05609	10.2601	5.49421e-24	3.49292e-23	43.042
PRPF6	1.60389	2.14386	10.2587	5.56942e-24	3.53898e-23	43.0285
PAK1IP1	1.39136	1.18262	10.2583	5.58921e-24	3.5498e-23	43.025
SH3GLB1	2.01451	3.44632	10.2578	5.61706e-24	3.56572e-23	43.0201
GALNT11	1.366	1.11459	10.2527	5.90379e-24	3.74218e-23	42.9708
COPB2	1.90031	2.89282	10.2515	5.97086e-24	3.78282e-23	42.9596
MRFAP1L1	1.59479	1.52162	10.2512	5.99158e-24	3.79408e-23	42.9562
ARL6IP5	1.99953	5.61578	10.2463	6.28481e-24	3.97779e-23	42.9089
UNC45A	1.5336	1.41914	10.2451	6.35373e-24	4.01943e-23	42.8981
CDC27	1.75014	1.81725	10.2441	6.41747e-24	4.05775e-23	42.8882
SMC2	1.07941	0.709613	10.2435	6.45502e-24	4.07948e-23	42.8824
MICA	1.08266	0.689365	10.2431	6.48063e-24	4.09365e-23	42.8785
EMC6	1.91411	2.1807	10.2406	6.64037e-24	4.19249e-23	42.8544
MLKL	1.57734	1.44183	10.2351	7.00676e-24	4.41947e-23	42.8012
TCF12	1.90382	2.45479	10.2342	7.06358e-24	4.45311e-23	42.7932
MPHOSPH9	1.29594	0.97003	10.2301	7.3548e-24	4.63215e-23	42.7532
RPUSD3	1.77974	1.83432	10.2292	7.41995e-24	4.67089e-23	42.7445
PLA2G4C	1.42883	1.05986	10.2291	7.42623e-24	4.67255e-23	42.7436
ICAM1	2.18276	5.60904	10.2286	7.45824e-24	4.69039e-23	42.7394
NDC1	1.16491	0.779831	10.2284	7.47359e-24	4.6957e-23	42.7373
FECH	1.35095	1.06703	10.2284	7.47401e-24	4.6957e-23	42.7373
ZYX	1.55048	5.11207	10.2274	7.54762e-24	4.73962e-23	42.7276
OVCA2	1.90006	2.54808	10.2268	7.59213e-24	4.76524e-23	42.7218
PMVK	1.67645	1.929	10.2168	8.36865e-24	5.24779e-23	42.6253
ENY2	2.325	4.39401	10.2168	8.36912e-24	5.24779e-23	42.6253
CTD-2545M3.8	1.21021	0.746808	10.2164	8.40241e-24	5.26609e-23	42.6214
PIN4	1.37271	1.36854	10.2141	8.59145e-24	5.38093e-23	42.5993
PDCD10	1.98342	2.69525	10.2064	9.25464e-24	5.78889e-23	42.5257
CYP27A1	1.54031	1.21459	10.1981	1.00296e-23	6.27056e-23	42.4461
FAM32A	2.14351	3.79631	10.1971	1.01263e-23	6.32553e-23	42.4366
TMEM59	2.00956	5.85089	10.1971	1.01274e-23	6.32553e-23	42.4365
SLC8B1	1.93096	2.91097	10.1931	1.05291e-23	6.57324e-23	42.398
MAD2L1BP	1.35574	0.943132	10.1921	1.0626e-23	6.63053e-23	42.3889
PHPT1	2.08513	3.46341	10.1905	1.07961e-23	6.7301e-23	42.3732
GBP2	2.05231	4.04349	10.1886	1.09914e-23	6.84855e-23	42.3555
CEP170	2.02214	3.47047	10.1873	1.11302e-23	6.93166e-23	42.343
NNT	1.49552	1.59319	10.1871	1.11557e-23	6.94414e-23	42.3408
EPB41L3	1.56738	2.29898	10.1831	1.15993e-23	7.21677e-23	42.3022
STAU1	1.69035	2.83428	10.181	1.18363e-23	7.36063e-23	42.2821
GYS1	1.50777	1.767	10.1795	1.20007e-23	7.45927e-23	42.2685
STX10	1.85225	2.30878	10.1795	1.20101e-23	7.46148e-23	42.2677
TNFAIP8	2.03397	3.17236	10.1784	1.21337e-23	7.53462e-23	42.2576
NARFL	1.3778	1.0733	10.1749	1.25546e-23	7.79222e-23	42.2238
TATDN1	1.45361	1.23565	10.1736	1.27115e-23	7.88201e-23	42.2115
POLD4	2.13111	5.20244	10.1675	1.34823e-23	8.35588e-23	42.1533
MLST8	1.5777	1.3879	10.167	1.35456e-23	8.39105e-23	42.1486
EFR3A	1.44735	1.57226	10.1637	1.39857e-23	8.65949e-23	42.117
NUP37	1.41706	1.06645	10.1631	1.40636e-23	8.70354e-23	42.1115
PPP2R1A	1.94643	4.4405	10.1522	1.56287e-23	9.66747e-23	42.007
SAYSD1	1.10532	0.748464	10.1513	1.57665e-23	9.74801e-23	41.9983
OGFOD1	1.36156	1.1359	10.149	1.61164e-23	9.95956e-23	41.9766
DNAJC8	2.03525	4.00372	10.1487	1.616e-23	9.98168e-23	41.9739
TMED7	1.79098	2.51914	10.1477	1.63174e-23	1.00719e-22	41.9643
TXNDC15	1.84414	1.98081	10.1477	1.63218e-23	1.00719e-22	41.9641
C7orf49	1.63713	1.66047	10.1454	1.66946e-23	1.0292e-22	41.9417
MBD4	1.63333	1.87446	10.1409	1.74247e-23	1.0737e-22	41.8993
DEK	1.96003	4.22559	10.1379	1.79471e-23	1.10483e-22	41.8701
CCT7	2.16561	4.5501	10.1377	1.79718e-23	1.10582e-22	41.8687
AC069363.1	1.05853	0.89925	10.1311	1.9152e-23	1.17787e-22	41.8058
YIPF5	1.7103	1.85765	10.1289	1.95578e-23	1.20225e-22	41.785
EYA3	1.58456	2.1382	10.128	1.97356e-23	1.2126e-22	41.7761
HGS	2.00288	3.80692	10.1274	1.98409e-23	1.21849e-22	41.7708
NUDT14	1.55733	1.29354	10.1248	2.03597e-23	1.24975e-22	41.7452
ATG3	2.02311	5.38634	10.1225	2.0803e-23	1.27635e-22	41.7239
CENPW	1.35246	0.912606	10.1202	2.1262e-23	1.30389e-22	41.7023
TMEM184C	1.46385	1.45098	10.1172	2.19015e-23	1.34246e-22	41.673
LCMT1	1.64992	1.50162	10.1154	2.22783e-23	1.3649e-22	41.6561
NFE2L1	1.07673	1.0694	10.1098	2.35042e-23	1.43932e-22	41.6031
DCAF13	1.70125	1.75563	10.1059	2.43991e-23	1.49341e-22	41.5661
COX14	1.98328	2.72616	10.0987	2.61598e-23	1.60042e-22	41.4971
UBQLN2	1.51427	1.70277	10.0957	2.69134e-23	1.64573e-22	41.469
XRN2	1.73435	2.83119	10.0934	2.7507e-23	1.68043e-22	41.4474
CYBA	1.94241	5.52485	10.092	2.7886e-23	1.70278e-22	41.4339
CCR5	1.62269	1.85577	10.0911	2.81285e-23	1.71676e-22	41.4253
CCDC115	1.83352	2.31489	10.0908	2.8213e-23	1.7211e-22	41.4223
DNMT3A	1.09871	0.873936	10.0901	2.83998e-23	1.73167e-22	41.4158
MR1	1.64332	1.84819	10.09	2.84402e-23	1.73331e-22	41.4144
RANBP1	2.02594	2.83438	10.0885	2.88534e-23	1.75682e-22	41.4001
MRPL20	2.08505	3.62053	10.0878	2.90296e-23	1.76671e-22	41.3941
RABL3	1.22691	0.873664	10.0855	2.96927e-23	1.80621e-22	41.3717
SLC35B1	1.96574	2.69025	10.0841	3.00932e-23	1.8297e-22	41.3585
SPAG7	2.05522	2.80882	10.0839	3.01332e-23	1.83127e-22	41.3572
H2AFZ	2.27241	5.56794	10.0836	3.02292e-23	1.83623e-22	41.354
PQLC3	1.95177	2.49452	10.0831	3.03785e-23	1.84443e-22	41.3491
TSC22D1	1.79704	1.61895	10.0816	3.0815e-23	1.87005e-22	41.335
MED16	1.45091	1.40052	10.0811	3.09622e-23	1.87809e-22	41.3303
COX7C	2.05942	6.93094	10.0793	3.14958e-23	1.90955e-22	41.3134
IQCG	1.02524	0.605816	10.076	3.25241e-23	1.97097e-22	41.2816
TMOD2	1.05438	0.746723	10.0751	3.27913e-23	1.98622e-22	41.2735
MCUR1	1.1155	0.909909	10.0674	3.53028e-23	2.13701e-22	41.2004
FLII	2.10545	5.48321	10.0674	3.53141e-23	2.13701e-22	41.2001
HADH	1.45614	1.40571	10.0638	3.65395e-23	2.21012e-22	41.1664
MTX2	1.51623	1.28819	10.0633	3.6729e-23	2.22054e-22	41.1613
COPS3	2.07229	2.84126	10.0617	3.72786e-23	2.2527e-22	41.1466
CCDC159	1.50002	1.31693	10.0599	3.79431e-23	2.29178e-22	41.1291
RWDD2B	1.26153	0.921904	10.058	3.86244e-23	2.33183e-22	41.1115
MAFB	1.61465	2.45924	10.0566	3.91451e-23	2.35993e-22	41.0982
YEATS2	1.27881	1.51888	10.0543	4.00256e-23	2.41188e-22	41.0762
POMP	1.61907	5.91359	10.0537	4.02558e-23	2.42461e-22	41.0705
COPZ1	2.16012	4.60383	10.0533	4.04112e-23	2.43283e-22	41.0667
HADHA	1.9347	4.4365	10.051	4.13252e-23	2.48669e-22	41.0446
RASSF1	1.86901	2.40888	10.0493	4.19724e-23	2.52445e-22	41.0292
CACUL1	1.67677	3.06169	10.0493	4.20056e-23	2.52526e-22	41.0284
MEAF6	1.86425	2.4847	10.0469	4.29809e-23	2.58268e-22	41.0057
CCDC93	1.47352	1.56456	10.0436	4.43342e-23	2.66275e-22	40.975
PIGC	1.33023	0.971076	10.0403	4.57586e-23	2.74701e-22	40.9437
SLC4A2	1.71636	1.8186	10.04	4.58773e-23	2.75285e-22	40.9411
CIAPIN1	1.72394	1.81441	10.0384	4.66176e-23	2.79596e-22	40.9253
FCAR	1.55588	1.3103	10.035	4.8153e-23	2.88535e-22	40.8932
VPS18	1.17853	0.931741	10.0343	4.84479e-23	2.90031e-22	40.8872
TOMM20	1.81495	4.14727	10.032	4.95242e-23	2.96336e-22	40.8654
RAE1	1.54574	1.55427	10.0313	4.98803e-23	2.98328e-22	40.8583
P2RX7	1.64414	1.82295	10.029	5.09901e-23	3.04823e-22	40.8366
UBE2D1	1.77701	2.46075	10.0274	5.1762e-23	3.09294e-22	40.8217
COQ5	1.45089	1.14704	10.0258	5.25809e-23	3.14041e-22	40.8062
DNAJC10	1.58895	2.0328	10.0199	5.55908e-23	3.31554e-22	40.7511
RCN1	1.49508	1.4218	10.0189	5.61461e-23	3.3471e-22	40.7412
PLEKHB2	1.88577	4.36601	10.0155	5.79641e-23	3.45387e-22	40.7097
RASA3	1.24615	1.25024	10.0138	5.89534e-23	3.51119e-22	40.693
MRPL45	1.52934	1.38437	10.0118	6.00832e-23	3.57682e-22	40.6742
STIP1	2.07264	4.01595	10.0116	6.01724e-23	3.58047e-22	40.6727
RP11-403P17.3	1.73782	2.39612	10.0095	6.13824e-23	3.65078e-22	40.653
DCTN1	1.86608	2.88287	10.0081	6.22169e-23	3.69869e-22	40.6396
AP1M1	1.93966	3.45429	10.0039	6.47759e-23	3.84725e-22	40.5997
IRAK3	1.51541	2.02323	10.003	6.53147e-23	3.87745e-22	40.5915
SRA1	1.97482	3.79964	10.0018	6.6046e-23	3.91905e-22	40.5805
DTD1	1.53534	1.44664	9.99451	7.08178e-23	4.19998e-22	40.5115
VPS4B	1.63812	1.98062	9.99447	7.08458e-23	4.19998e-22	40.5111
STARD3NL	1.77414	1.96852	9.99437	7.09091e-23	4.20102e-22	40.5102
SH3BP2	1.54724	3.20753	9.99276	7.20038e-23	4.26272e-22	40.4951
ERCC2	1.08474	0.67393	9.99254	7.21558e-23	4.26975e-22	40.493
YEATS4	1.25149	0.833138	9.9863	7.6573e-23	4.52486e-22	40.4342
MRPS28	1.71142	1.66397	9.9848	7.76674e-23	4.58742e-22	40.4201
FTSJ1	1.56849	1.66664	9.98413	7.81641e-23	4.61463e-22	40.4138
KAT5	1.67215	1.77729	9.98009	8.12235e-23	4.79304e-22	40.3758
ALDH9A1	1.61551	1.59753	9.97409	8.59939e-23	5.07222e-22	40.3193
TDP2	1.39437	1.23147	9.97234	8.74321e-23	5.15467e-22	40.3029
ZNF330	1.65587	1.70261	9.97172	8.7951e-23	5.18289e-22	40.2971
PANK4	1.20732	0.887666	9.97133	8.82786e-23	5.1998e-22	40.2934
ATF7	1.61269	1.95743	9.96262	9.58889e-23	5.64547e-22	40.2116
TSR2	1.61753	1.68106	9.95968	9.85968e-23	5.80223e-22	40.184
NFU1	1.56629	1.3773	9.95925	9.90035e-23	5.82349e-22	40.1799
NFYC	1.9096	2.9655	9.95669	1.01438e-22	5.96125e-22	40.1559
PSMD12	1.78216	2.66423	9.95619	1.01916e-22	5.98655e-22	40.1513
POLR2G	2.13456	3.58189	9.95488	1.03197e-22	6.05907e-22	40.1389
WSB2	1.3407	1.57044	9.95469	1.03383e-22	6.0672e-22	40.1371
ZBTB8OS	1.9177	2.27243	9.95378	1.04275e-22	6.11671e-22	40.1286
ECSIT	1.53422	1.30963	9.94996	1.08118e-22	6.33415e-22	40.0928
MRPL55	2.08723	2.61578	9.94676	1.11447e-22	6.52253e-22	40.0628
PPP5C	1.35016	1.30649	9.93643	1.22913e-22	7.18047e-22	39.9659
TSNAX	1.64902	2.11124	9.93545	1.2406e-22	7.24091e-22	39.9567
INTS10	1.87609	2.26646	9.93322	1.26702e-22	7.3917e-22	39.9358
PIGS	1.86144	2.54981	9.93039	1.30141e-22	7.58892e-22	39.9093
PIGP	1.45514	1.13859	9.92583	1.3588e-22	7.91993e-22	39.8666
PARP1	1.67205	2.28594	9.92341	1.39034e-22	8.10012e-22	39.8439
NME6	1.38734	1.03881	9.92259	1.40113e-22	8.15924e-22	39.8363
ARMCX1	1.19074	0.796802	9.92219	1.40643e-22	8.18641e-22	39.8326
AGGF1	1.38357	1.35791	9.91738	1.4719e-22	8.56362e-22	39.7875
TRIAP1	1.51317	1.32868	9.91609	1.48989e-22	8.66434e-22	39.7755
ITM2B	1.48203	8.1	9.91046	1.57127e-22	9.12515e-22	39.7229
TMEM189	1.51977	1.70141	9.90599	1.63906e-22	9.51025e-22	39.6811
GHITM	1.98116	5.14708	9.90533	1.64941e-22	9.566e-22	39.6749
FAM118B	1.42617	1.21407	9.90444	1.66322e-22	9.64169e-22	39.6666
SDHA	2.03317	3.48651	9.89972	1.73906e-22	1.00768e-21	39.6225
UBXN11	1.6497	3.99953	9.89785	1.76998e-22	1.02514e-21	39.6051
THOC5	1.27627	0.945187	9.89657	1.79157e-22	1.03717e-21	39.5931
NF2	1.40645	1.77764	9.89601	1.80107e-22	1.04138e-21	39.5878
PSMF1	2.13579	4.6635	9.89323	1.84891e-22	1.06796e-21	39.5619
LARS	1.82372	2.81634	9.89243	1.86285e-22	1.07504e-21	39.5545
AL353354.2	1.93376	3.02819	9.88647	1.97054e-22	1.13616e-21	39.4989
ANAPC15	1.77226	1.8133	9.88365	2.02365e-22	1.16626e-21	39.4725
BTK	1.95464	3.21324	9.8835	2.02662e-22	1.16696e-21	39.4711
ZFPL1	1.28395	0.959184	9.88349	2.02669e-22	1.16696e-21	39.4711
TOMM6	2.192	4.60334	9.87766	2.14126e-22	1.23238e-21	39.4167
POLL	1.18633	0.822817	9.87572	2.18059e-22	1.25445e-21	39.3987
ANKRD22	1.78341	1.96867	9.8754	2.18736e-22	1.25778e-21	39.3956
RP11-386G11.10	1.78195	6.49929	9.87524	2.19051e-22	1.25903e-21	39.3942
AC007318.5	1.14348	1.85137	9.87289	2.23949e-22	1.28661e-21	39.3723
FLOT2	1.79232	2.92129	9.87061	2.28828e-22	1.31405e-21	39.351
PARVB	1.09566	1.47569	9.8694	2.31435e-22	1.32842e-21	39.3397
COMMD8	1.68792	1.9333	9.86351	2.44642e-22	1.4036e-21	39.2848
BNIP1	1.17499	0.901911	9.86194	2.48281e-22	1.42384e-21	39.2702
CNDP2	2.01954	5.27325	9.86064	2.51321e-22	1.43999e-21	39.2582
PYURF	1.93632	3.19667	9.85926	2.5461e-22	1.45818e-21	39.2453
USP5	1.38911	1.5019	9.85889	2.55496e-22	1.4626e-21	39.2419
[truncated: 1,670 more rows]
